# Supplementary material for: Synthesis and In Vitro Cytotoxic Properties of Polycarbo-Substituted 4-(Arylamino)quinazolines
Source: PubMed Central journal article supplement (PMC6274161; doi:10.3390/molecules21101366), 2016-10-14
Supplement: molecules-21-01366-s001.pdf [file molecules-21-01366-s001.pdf]

# Supplementary Materials: Synthesis and In Vitro Cytotoxic Properties of Polycarbo-Substituted 4-(Arylamino)quinazolines

Hugues Kamdem Paumo, Tshepiso Jan Makhafola and Malose Jack Mphahlele

## 1. Detailed Experimental Section

### 1.1. Generalised Procedure for the Aminination of **1a–d**

A stirred mixture of **1** (1 equiv.), 3-fluoroaniline (1.1 equiv.) and concentrated HCl (0.01 g, 0.27 mmol) in 3:1 THF-isopropanol (5 mL/mmol of **1**) was heated at 70 °C for 5 h and then allowed to cool to RT. The reaction mixture was quenched with an ice-cold water and the product was extracted into ethyl acetate. The organic layers were washed with an aqueous solution of NaHCO<sub>3</sub>, dried over anhydrous MgSO<sub>4</sub>, filtered and evaporated under reduced pressure to afford **2** as a solid. The following products (**2a–d**) were prepared in this fashion:

*Bromo-N-(3-fluorophenyl)-8-iodo-2-phenylquinazolin-4-amine (2a)*: Yellow solid (1.07 g, 92%), mp. 199–200 °C;  $\nu_{\max}$  (ATR) 445, 551, 701, 770, 957, 1128, 1306, 1397, 1448, 1541, 1590, 1616, 3424 cm<sup>-1</sup>;  $\delta_{\text{H}}$  (500 MHz, DMSO-*d*<sub>6</sub>) 7.02 (td, *J* = 2.5 and 8.0 Hz, 1H), 7.50 (q, *J* = 8.0 Hz, 1H), 7.55–7.58 (m, 3H), 7.75 (d, *J* = 8.5 Hz, 1H), 7.95 (dt, *J* = 2.0 and 11.5 Hz, 1H), 8.48–8.49 (m, 2H), 8.57 (d, *J* = 1.5 Hz, 1H), 8.89 (d, *J* = 1.5 Hz, 1H), 10.13 (s, 1H);  $\delta_{\text{C}}$  (125 MHz, DMSO-*d*<sub>6</sub>) 105.2, 109.3 (d, <sup>2</sup>*J*<sub>CF</sub> = 26.5 Hz), 110.8 (d, <sup>2</sup>*J*<sub>CF</sub> = 20.9 Hz), 115.7, 118.2 (d, <sup>4</sup>*J*<sub>CF</sub> = 2.8 Hz), 119.4, 126.3, 128.5, 129.1, 130.6 (d, <sup>3</sup>*J*<sub>CF</sub> = 8.5 Hz), 131.5, 137.9, 141.2 (d, <sup>3</sup>*J*<sub>CF</sub> = 11.3 Hz), 145.2, 149.2, 157.9, 160.5, 162.4 (d, <sup>1</sup>*J*<sub>CF</sub> = 239.8 Hz); *m/z* 520 (100, MH<sup>+</sup>); HRMS (ES): MH<sup>+</sup>, found 519.9230. C<sub>20</sub>H<sub>13</sub>BrFIN<sub>3</sub><sup>+</sup> requires 519.9243.

*6-Bromo-N-(3-fluorophenyl)-2-(4-fluorophenyl)-8-iodoquinazolin-4-amine (2b)*: Yellow solid (1.03 g, 89%), mp. 248–249 °C;  $\nu_{\max}$  (ATR) 446, 522, 559, 682, 709, 794, 961, 1145, 1303, 1395, 1444, 1546, 1586, 1611, 3452 cm<sup>-1</sup>;  $\delta_{\text{H}}$  (500 MHz, DMSO-*d*<sub>6</sub>) 7.00 (td, *J* = 2.0 and 8.0 Hz, 1H), 7.37 (t, *J* = 2.0 and 9.0 Hz, 2H), 7.48 (q, *J* = 8.0 Hz, 1H), 7.71 (dd, *J* = 1.5 and 8.5 Hz, 1H), 7.86 (dt, *J* = 2.5 and 11.5 Hz, 1H), 8.46 (t, *J* = 9.0 Hz, 2H), 8.51 (d, *J* = 2.0 Hz, 1H), 8.82 (d, *J* = 2.0 Hz, 1H), 10.08 (s, 1H);  $\delta_{\text{C}}$  (125 MHz, DMSO-*d*<sub>6</sub>) 105.0, 109.3 (d, <sup>2</sup>*J*<sub>CF</sub> = 26.6 Hz), 110.9 (d, <sup>2</sup>*J*<sub>CF</sub> = 20.9 Hz), 115.5, 116.0 (d, <sup>2</sup>*J*<sub>CF</sub> = 21.7 Hz), 118.2 (d, <sup>4</sup>*J*<sub>CF</sub> = 2.8 Hz), 119.3, 126.3, 130.5 (d, <sup>3</sup>*J*<sub>CF</sub> = 9.3 Hz), 130.7 (d, <sup>3</sup>*J*<sub>CF</sub> = 9.5 Hz), 134.3 (d, <sup>4</sup>*J*<sub>CF</sub> = 2.8 Hz), 141.1 (d, <sup>3</sup>*J*<sub>CF</sub> = 11.3 Hz), 145.1, 149.0, 157.9, 159.4, 162.4 (d, <sup>1</sup>*J*<sub>CF</sub> = 239.8 Hz), 164.5 (d, <sup>1</sup>*J*<sub>CF</sub> = 246.5 Hz); *m/z* 539 (100, MH<sup>+</sup>); HRMS (ES): MH<sup>+</sup>, found 538.9250. C<sub>20</sub>H<sub>12</sub>BrF<sub>2</sub>IN<sub>3</sub><sup>+</sup> requires 538.9129.

*6-Bromo-2-(4-chlorophenyl)-N-(3-fluorophenyl)-8-iodoquinazolin-4-amine (2c)*: Yellow solid (1.08 g, 94%), mp. 236–237 °C;  $\nu_{\max}$  (ATR) 438, 480, 550, 669, 701, 775, 964, 1131, 1299, 1387, 1458, 1542, 1587, 1602, 3428 cm<sup>-1</sup>;  $\delta_{\text{H}}$  (500 MHz, DMSO-*d*<sub>6</sub>) 7.02 (td, *J* = 2.5 and 8.0 Hz, 1H), 7.49 (q, *J* = 8.5 Hz, 1H), 7.63 (d, *J* = 8.5 Hz, 2H), 7.72 (dd, *J* = 1.5 and 8.0 Hz, 1H), 7.86 (dt, *J* = 2.5 and 11.5 Hz, 1H), 8.43 (d, *J* = 8.5 Hz, 2H), 8.56 (d, *J* = 2.0 Hz, 1H), 8.82 (d, *J* = 2.0 Hz, 1H), 10.14 (s, 1H);  $\delta_{\text{C}}$  (125 MHz, DMSO-*d*<sub>6</sub>) 105.1, 109.4 (d, <sup>2</sup>*J*<sub>CF</sub> = 25.6 Hz), 110.9 (d, <sup>2</sup>*J*<sub>CF</sub> = 20.9 Hz), 115.8, 118.3 (d, <sup>4</sup>*J*<sub>CF</sub> = 2.8 Hz), 119.5, 126.4, 129.2, 130.1, 130.5 (d, <sup>3</sup>*J*<sub>CF</sub> = 8.6 Hz), 136.3, 136.8, 141.0 (d, <sup>3</sup>*J*<sub>CF</sub> = 10.3 Hz), 145.2, 149.1, 158.0, 159.5, 162.4 (d, <sup>1</sup>*J*<sub>CF</sub> = 239.8 Hz); *m/z* 555 (100, MH<sup>+</sup>); HRMS (ES): MH<sup>+</sup>, found 554.9409. C<sub>20</sub>H<sub>12</sub>BrClFIN<sub>3</sub><sup>+</sup> requires 554.9407.

*6-Bromo-N-(3-fluorophenyl)-8-iodo-2-(4-methoxyphenyl)quinazolin-4-amine (2d)*: Yellow solid (1.04 g, 90%), mp. 181–183 °C;  $\nu_{\max}$  (ATR) 444, 551, 675, 762, 792, 959, 1128, 1164, 1242, 1408, 1458, 1542, 1588, 1609, 2830, 2933, 3413 cm<sup>-1</sup>;  $\delta_{\text{H}}$  (500 MHz, DMSO-*d*<sub>6</sub>) 3.83 (s, 3H), 6.98 (td, *J* = 2.5 and 8.5 Hz, 1H), 7.08 (d, *J* = 8.5 Hz, 2H), 7.47 (q, *J* = 8.5 Hz, 1H), 7.72 (dd, *J* = 1.5 and 8.0 Hz, 1H), 7.92 (dt, *J* = 2.5 and 11.5 Hz, 1H), 8.39 (d, *J* = 9.0 Hz, 2H), 8.49 (d, *J* = 2.0 Hz, 1H), 8.81 (d, *J* = 2.0 Hz, 1H), 10.01 (s, 1H);  $\delta_{\text{C}}$  (125 MHz, DMSO-*d*<sub>6</sub>) 55.8, 104.9, 109.1 (d, <sup>2</sup>*J*<sub>CF</sub> = 26.3 Hz), 110.7 (d, <sup>2</sup>*J*<sub>CF</sub> = 20.6 Hz), 114.4, 115.3, 118.1 (d, <sup>4</sup>*J*<sub>CF</sub> = 2.8 Hz), 118.7, 126.2, 130.2, 130.3, 130.5 (d, <sup>3</sup>*J*<sub>CF</sub> = 8.6 Hz), 141.2 (d, <sup>3</sup>*J*<sub>CF</sub> = 10.3 Hz), 144.9, 149.2, 157.7, 160.3, 162.1, 162.4 (d, <sup>1</sup>*J*<sub>CF</sub> = 239.3 Hz); *m/z* 550 (100, MH<sup>+</sup>); HRMS (ES): MH<sup>+</sup>, found 549.9417. C<sub>21</sub>H<sub>15</sub>BrFIN<sub>3</sub>O<sup>+</sup> requires 549.9427.

### 1.2 Generalised Procedure for the One-Pot Two-Step Sequential Amination and Suzuki-Miyaura Cross-Coupling of **1a–d**

A stirred mixture of **1a** (0.50 g, 1.12 mmol), 3-fluoroaniline (0.14 g, 1.23 mmol) and concentrated HCl (0.01 g, 0.27 mmol) in 3:1 THF-isopropanol (*v/v*, 10 mL) was heated at 70 °C for 5 h until the starting material was completely consumed (thin layer chromatography monitoring) and then cooled to RT. The cooled mixture was treated sequentially with Pd(PPh<sub>3</sub>)<sub>4</sub> (0.064 g, 0.056 mmol) and a solution of K<sub>2</sub>CO<sub>3</sub> (0.46 g, 3.36 mmol) in water (5 mL) followed by purging with argon gas for 30 min. A solution of 4-methoxyphenylboronic acid (0.20 g, 1.34 mmol) in THF (5 mL) was then injected using a syringe. The reaction mixture was stirred at 70 °C for additional 3 h and then quenched with an ice-cold water. The product was extracted into ethyl acetate and the combined organic layers were washed with water, dried over MgSO<sub>4</sub>, filtered and evaporated under reduced pressure. The residue was purified by column chromatography on silica gel to afford **3a** as a solid. Compounds **3b–d** were also prepared in this fashion from the corresponding substrates.

**6-Bromo-N-(3-fluorophenyl)-8-(4-methoxyphenyl)-2-phenylquinazolin-4-amine (3a)**: Yellow solid (0.45 g, 82%), *R<sub>f</sub>* (toluene) 0.40, mp. 210–211 °C;  $\nu_{\max}$  (ATR) 450, 501, 565, 676, 717, 773, 829, 975, 1061, 1147, 1289, 1351, 1395, 1440, 1557, 1607, 2846, 3018, 3426 cm<sup>-1</sup>;  $\delta_{\text{H}}$  (500 MHz, DMSO-*d*<sub>6</sub>) 3.86 (s, 3H), 7.00 (td, *J* = 2.0 and 8.5 Hz, 1H), 7.10 (d, *J* = 8.5 Hz, 2H), 7.50 (m, 4H), 7.77 (d, *J* = 8.5 Hz, 2H), 7.79 (d, *J* = 8.5 Hz, 1H), 7.97 (d, *J* = 2.5 Hz, 1H), 8.00 (dt, *J* = 2.0 and 8.5 Hz, 1H), 8.30–8.32 (m, 2H), 8.82 (d, *J* = 2.0 Hz, 1H), 10.04 (s, 1H);  $\delta_{\text{C}}$  (125 MHz, DMSO-*d*<sub>6</sub>) 55.6, 109.1 (d, <sup>2</sup>*J*<sub>CF</sub> = 26.6 Hz), 110.3 (d, <sup>2</sup>*J*<sub>CF</sub> = 20.8 Hz), 113.7, 116.2, 118.0 (d, <sup>4</sup>*J*<sub>CF</sub> = 2.7 Hz), 119.0, 124.5, 128.3, 129.0, 129.3, 129.7, 130.5 (d, <sup>3</sup>*J*<sub>CF</sub> = 9.5 Hz), 131.0, 132.5, 135.9, 138.5, 141.3 (d, <sup>3</sup>*J*<sub>CF</sub> = 10.3 Hz), 147.3, 157.7, 158.9, 159.5, 162.5 (d, <sup>1</sup>*J*<sub>CF</sub> = 239.0 Hz); *m/z* 500 (100, MH<sup>+</sup>); HRMS (ES): MH<sup>+</sup>, found 500.0780. C<sub>27</sub>H<sub>20</sub>BrFN<sub>3</sub>O<sup>+</sup> requires 500.0774.

**6-Bromo-N-(3-fluorophenyl)-2-(4-fluorophenyl)-8-(4-methoxyphenyl)-quinazolin-4-amine (3b)**: Yellow solid (0.41 g, 74%), *R<sub>f</sub>* (toluene) 0.56, mp. 215–217 °C;  $\nu_{\max}$  (ATR) 556, 565, 576, 673, 752, 762, 825, 1162, 1249, 1419, 1489, 1507, 1533, 1559, 1610, 2836, 2922, 3459 cm<sup>-1</sup>;  $\delta_{\text{H}}$  (500 MHz, DMSO-*d*<sub>6</sub>) 3.81 (s, 3H), 7.00 (td, *J* = 2.0 and 8.0 Hz, 1H), 7.05 (d, *J* = 9.0 Hz, 2H), 7.35 (t, *J* = 9.0 Hz, 2H), 7.49 (q, *J* = 8.0 Hz, 1H), 7.77 (d, *J* = 8.0 Hz, 1H), 7.82 (t, *J* = 8.0 Hz, 2H), 7.96–7.99 (m, 2H), 8.22 (d, *J* = 8.5 Hz, 2H), 8.83 (d, *J* = 2.0 Hz, 1H), 10.01 (s, 1H);  $\delta_{\text{C}}$  (125 MHz, DMSO-*d*<sub>6</sub>) 55.7, 109.0 (d, <sup>2</sup>*J*<sub>CF</sub> = 25.5 Hz), 110.4 (d, <sup>2</sup>*J*<sub>CF</sub> = 20.9 Hz), 114.4, 115.0 (d, <sup>2</sup>*J*<sub>CF</sub> = 21.7 Hz), 115.9, 118.0 (d, <sup>4</sup>*J*<sub>CF</sub> = 2.8 Hz), 118.3, 125.1, 130.0, 130.5 (d, <sup>3</sup>*J*<sub>CF</sub> = 9.5 Hz), 130.8, 133.2 (d, <sup>3</sup>*J*<sub>CF</sub> = 9.5 Hz), 133.8 (d, <sup>4</sup>*J*<sub>CF</sub> = 2.7 Hz), 136.2, 140.1, 141.5 (d, <sup>3</sup>*J*<sub>CF</sub> = 11.3 Hz), 147.4, 157.5, 159.0, 161.8, 162.4 (d, <sup>1</sup>*J*<sub>CF</sub> = 243.6 Hz), 162.5 (d, <sup>1</sup>*J*<sub>CF</sub> = 240.0 Hz); *m/z* 518 (100, MH<sup>+</sup>); HRMS (ES): MH<sup>+</sup>, found 518.0681. C<sub>27</sub>H<sub>19</sub>BrF<sub>2</sub>N<sub>3</sub>O<sup>+</sup> requires 518.0680.

**6-Bromo-2-(4-chlorophenyl)-N-(3-fluorophenyl)-8-(4-methoxyphenyl)quinazolin-4-amine (3c)**: Yellow solid (0.44 g, 79%), *R<sub>f</sub>* (toluene) 0.57, mp. 245–246 °C;  $\nu_{\max}$  (ATR) 488, 565, 745, 770, 801, 832, 1012, 1086, 1145, 1246, 1348, 1404, 1463, 1489, 1510, 1529, 1555, 1606, 2841, 3423 cm<sup>-1</sup>;  $\delta_{\text{H}}$  (500 MHz, DMSO-*d*<sub>6</sub>) 3.85 (s, 3H), 7.00 (td, *J* = 2.0 and 8.0 Hz, 1H), 7.08 (d, *J* = 8.0 Hz, 2H), 7.49 (q, *J* = 8.0 Hz, 1H), 7.56 (d, *J* = 8.5 Hz, 2H), 7.73 (d, *J* = 8.5 Hz, 2H), 7.76 (dd, *J* = 1.5 and 8.0 Hz, 1H), 7.91 (dt, *J* = 2.5 and 11.5 Hz, 1H), 7.97 (d, *J* = 2.5 Hz, 1H), 8.26 (d, *J* = 8.5 Hz, 2H), 8.80 (d, *J* = 2.5 Hz, 1H), 10.06 (s, 1H);  $\delta_{\text{C}}$  (125 MHz, DMSO-*d*<sub>6</sub>) 55.6, 109.2 (d, <sup>2</sup>*J*<sub>CF</sub> = 26.3 Hz), 110.6 (d, <sup>2</sup>*J*<sub>CF</sub> = 20.6 Hz), 113.7, 116.2, 118.3 (d, <sup>4</sup>*J*<sub>CF</sub> = 2.8 Hz), 119.2, 124.5, 129.1, 129.6, 129.9, 130.5 (d, <sup>3</sup>*J*<sub>CF</sub> = 9.1 Hz), 132.4, 135.8, 136.0, 137.4, 141.2, 141.3 (d, <sup>3</sup>*J*<sub>CF</sub> = 13.7 Hz), 147.2, 157.8, 158.0, 159.5, 162.4 (d, <sup>1</sup>*J*<sub>CF</sub> = 239.3 Hz); *m/z* 534 (100, MH<sup>+</sup>); HRMS (ES): MH<sup>+</sup>, found 534.0399. C<sub>27</sub>H<sub>19</sub>BrClFN<sub>3</sub>O<sup>+</sup> requires 534.0384.

**6-Bromo-N-(3-fluorophenyl)-2,8-bis(4-methoxyphenyl)quinazolin-4-amine (3d)**: Yellow solid (0.45 g, 80%), *R<sub>f</sub>* (toluene) 0.26, mp. 212–213 °C;  $\nu_{\max}$  (ATR) 521, 576, 752, 804, 831, 1164, 1239, 1346, 1418, 1509, 1526, 1559, 1592, 1608, 2837, 2936, 3006, 3406 cm<sup>-1</sup>;  $\delta_{\text{H}}$  (500 MHz, DMSO-*d*<sub>6</sub>) 3.79 (s, 3H), 3.84 (s, 3H), 6.98 (td, *J* = 2.0 and 8.0 Hz, 1H), 7.02 (d, *J* = 8.5 Hz, 2H), 7.07 (d, *J* = 9.0 Hz, 2H), 7.47 (q, *J* = 8.0 Hz, 1H), 7.73 (d, *J* = 9.0 Hz, 2H), 7.76 (dd, *J* = 1.5 and 8.0 Hz, 1H), 7.91 (d, *J* = 1.5 Hz, 1H), 7.97 (dt, *J* = 2.5 and 11.5 Hz, 1H), 8.23 (d, *J* = 9.0 Hz, 2H), 8.76 (d, *J* = 1.5 Hz, 1H), 9.96 (s, 1H);  $\delta_{\text{C}}$  (125 MHz, DMSO-*d*<sub>6</sub>) 55.6, 55.7, 109.0 (d, <sup>2</sup>*J*<sub>CF</sub> = 25.6 Hz), 110.3 (d, <sup>2</sup>*J*<sub>CF</sub> = 20.8 Hz), 113.7, 114.3, 115.9, 117.9 (d, <sup>4</sup>*J*<sub>CF</sub> = 2.7 Hz), 118.4, 124.4, 129.7, 129.9, 130.5 (d, <sup>3</sup>*J*<sub>CF</sub> = 9.5 Hz), 130.9, 132.4, 135.7, 141.0, 141.5 (d, <sup>3</sup>*J*<sub>CF</sub> = 10.3 Hz), 147.4, 157.5,

158.8, 159.5, 161.8, 162.4 (d,  $^1J_{CF} = 239.8$  Hz);  $m/z$  530 (100,  $MH^+$ ); HRMS (ES):  $MH^+$ , found 530.0891.  $C_{28}H_{22}BrFN_3O_2^+$  requires 530.0879.

### 1.3. A General Procedure for the One-Pot Two-Step Sequential Amination and Sonogashira Cross-Coupling of **1a–d**

A stirred mixture of **1a** (0.40 g, 0.89 mmol), 3-fluoroaniline (0.11 g, 0.98 mmol) and concentrated HCl (0.01 g, 0.27 mmol) in 3:1 THF-isopropanol (v/v, 10 mL) in a two necked flask equipped with rubber septum and a condenser fitted with calcium chloride tube was heated at 70 °C for 5 h. After cooling, Pd(PPh<sub>3</sub>)<sub>4</sub> (0.051 g, 0.044 mmol), CuI (0.008 g, 0.044 mmol) K<sub>2</sub>CO<sub>3</sub> (0.37 g, 2.67 mmol) and 3-butyn-2-ol (0.081 g, 1.15 mmol) in THF (5 mL) were introduced to the mixture under argon atmosphere. A balloon filled with argon was fitted to the top of the condenser and the mixture was stirred for additional 18 h at RT under argon atmosphere. The mixture was quenched with an ice-cold water and the product was extracted into ethyl acetate. The combined organic layers were washed with water, dried over anhyd. MgSO<sub>4</sub>, filtered and evaporated under reduced pressure. The residue was purified by column chromatography on silica gel to afford **4a**. Compounds **4b–d** were also prepared from the corresponding substrates in this fashion.

*4-[6-Bromo-4-(3-fluorophenylamino)-2-phenylquinazolin-8-yl]but-3-yn-2-ol (4a)*: Orange solid (0.26 g, 63%),  $R_f$  (9:1 toluene-ethyl acetate) 0.26, mp. 172–174 °C;  $\nu_{max}$  (ATR) 539, 697, 712, 782, 861, 1071, 1142, 1368, 1470, 1524, 1556, 1612, 2924, 3070, 3308, 3478  $cm^{-1}$ ;  $\delta_H$  (500 MHz, DMSO-*d*<sub>6</sub>) 1.51 (d,  $J = 6.5$  Hz, 3H), 4.76 (d,  $J = 6.0$  Hz, 1H), 5.60 (d,  $J = 6.0$  Hz, 1H), 7.00 (td,  $J = 2.5$  and 8.0 Hz, 1H), 7.51 (q,  $J = 8.0$  Hz, 1H), 7.52–7.59 (m, 3H), 7.74 (d,  $J = 8.0$  Hz, 1H), 7.95 (dt,  $J = 2.0$  and 11.5 Hz, 1H), 8.05 (d,  $J = 2.0$  Hz, 1H), 8.46–8.49 (m, 2H), 8.83 (d,  $J = 2.0$  Hz, 1H), 10.06 (s, 1H);  $\delta_C$  (125 MHz, DMSO-*d*<sub>6</sub>) 24.9, 57.1, 78.6, 101.2, 109.0 (d,  $^2J_{CF} = 25.6$  Hz), 110.5 (d,  $^2J_{CF} = 20.8$  Hz), 115.5, 117.8, 117.9 (d,  $^4J_{CF} = 2.8$  Hz), 119.1, 128.2, 128.3, 128.7, 130.3 (d,  $^3J_{CF} = 9.5$  Hz), 131.1, 137.8, 138.9, 140.9 (d,  $^3J_{CF} = 11.3$  Hz), 150.9, 157.3, 159.5, 162.2 (d,  $^1J_{CF} = 239.0$  Hz);  $m/z$  462 (100,  $MH^+$ ); HRMS (ES):  $MH^+$ , found 462.0620.  $C_{24}H_{18}BrFN_3O^+$  requires 462.0617.

*4-[6-Bromo-2-(4-fluorophenyl)-4-(3-fluorophenylamino)quinazolin-8-yl]but-3-yn-2-ol (4b)*: Orange solid (0.29 g, 72%),  $R_f$  (9:1 toluene-ethyl acetate) 0.30, mp. 194–196 °C;  $\nu_{max}$  (ATR) 414, 581, 675, 769, 803, 844, 1098, 1147, 1221, 1350, 1471, 1527, 1558, 1611, 3073, 3360, 3471  $cm^{-1}$ ;  $\delta_H$  (500 MHz, DMSO-*d*<sub>6</sub>) 1.52 (d,  $J = 7.0$  Hz, 3H), 4.76 (p,  $J = 6.0$  Hz, 1H), 5.61 (d,  $J = 6.0$  Hz, 1H), 7.01 (td,  $J = 2.0$  and 8.0 Hz, 1H), 7.37 (t,  $J = 8.5$  Hz, 2H), 7.49 (q,  $J = 8.5$  Hz, 1H), 7.73 (d,  $J = 8.0$  Hz, 1H), 7.89 (dt,  $J = 2.5$  and 11.5 Hz, 1H), 8.05 (d,  $J = 2.0$  Hz, 1H), 8.50 (t,  $J = 8.0$  Hz, 2H), 8.82 (d,  $J = 2.0$  Hz, 1H), 10.07 (s, 1H);  $\delta_C$  (125 MHz, DMSO-*d*<sub>6</sub>) 25.1, 57.4, 78.9, 101.4, 109.3 (d,  $^2J_{CF} = 25.6$  Hz), 110.8 (d,  $^2J_{CF} = 19.9$  Hz), 115.7, 116.0 (d,  $^2J_{CF} = 21.7$  Hz), 118.1 (d,  $^4J_{CF} = 2.8$  Hz), 118.3, 124.3, 126.1, 130.6 (d,  $^3J_{CF} = 9.5$  Hz), 130.8 (d,  $^3J_{CF} = 8.5$  Hz), 134.6 (d,  $^4J_{CF} = 2.7$  Hz), 139.2, 141.0 (d,  $^3J_{CF} = 10.3$  Hz), 150.1, 157.6, 158.8, 162.4 (d,  $^1J_{CF} = 239.8$  Hz), 164.4 (d,  $^1J_{CF} = 247.5$  Hz);  $m/z$  480 (100,  $MH^+$ ); HRMS (ES):  $MH^+$ , found 480.0526.  $C_{24}H_{17}BrF_2N_3O^+$  requires 480.0523.

*4-[6-Bromo-2-(4-chlorophenyl)-4-(3-fluorophenylamino)quinazolin-8-yl]but-3-yn-2-ol (4c)*: Orange solid (0.28 g, 68%),  $R_f$  (9:1 toluene-ethyl acetate) 0.55, mp. 211–213 °C;  $\nu_{max}$  (ATR) 486, 676, 741, 768, 802, 842, 1086, 1099, 1142, 1348, 1365, 1466, 1488, 1528, 1557, 1611, 3073, 3350, 3467  $cm^{-1}$ ;  $\delta_H$  (500 MHz, DMSO-*d*<sub>6</sub>) 1.52 (d,  $J = 7.0$  Hz, 3H), 4.76 (p,  $J = 6.0$  Hz, 1H), 5.61 (d,  $J = 6.0$  Hz, 1H), 7.02 (td,  $J = 2.5$  and 8.5 Hz, 1H), 7.50 (q,  $J = 8.0$  Hz, 1H), 7.62 (d,  $J = 8.5$  Hz, 2H), 7.74 (dd,  $J = 1.5$  and 8.5 Hz, 1H), 7.88 (dt,  $J = 2.5$  and 12.0 Hz, 1H), 8.07 (d,  $J = 2.0$  Hz, 1H), 8.45 (d,  $J = 8.0$  Hz, 2H), 8.84 (d,  $J = 2.0$  Hz, 1H), 10.12 (s, 1H);  $\delta_C$  (125 MHz, DMSO-*d*<sub>6</sub>) 25.1, 57.4, 78.8, 101.5, 109.3 (d,  $^2J_{CF} = 25.6$  Hz), 110.9 (d,  $^2J_{CF} = 20.7$  Hz), 115.8, 118.3, 118.4 (d,  $^4J_{CF} = 2.8$  Hz), 124.3, 126.1, 129.1, 130.1, 130.6 (d,  $^3J_{CF} = 9.5$  Hz), 141.0 (d,  $^3J_{CF} = 10.3$  Hz), 136.2, 137.0, 139.3, 150.1, 157.6, 158.8, 162.4 (d,  $^1J_{CF} = 239.8$  Hz);  $m/z$  496 (100,  $MH^+$ ); HRMS (ES):  $MH^+$ , found 496.0220.  $C_{24}H_{17}BrClFN_3O^+$  requires 497.0228.

*4-[6-Bromo-4-(3-fluorophenylamino)-2-(4-methoxyphenyl)quinazolin-8-yl]but-3-yn-2-ol (4d)*: Yellow solid (0.24 g, 59%),  $R_f$  (9:1 toluene-ethyl acetate) 0.20, mp. 163–164 °C;  $\nu_{max}$  (ATR) 412, 536, 582, 674, 768, 799, 839, 869, 1028, 1144, 1162, 1242, 1348, 1362, 1418, 1488, 1528, 1588, 1608, 2926, 3069, 3359  $cm^{-1}$ ;  $\delta_H$  (500 MHz, DMSO-*d*<sub>6</sub>) 1.52 (d,  $J = 7.0$  Hz, 3H), 3.84 (s, 3H), 4.76 (p,  $J = 5.5$  Hz, 1H), 5.62 (d,  $J = 5.0$  Hz, 1H), 7.00 (td,  $J = 1.5$  and 8.5 Hz, 1H), 7.09 (d,  $J = 9.0$  Hz, 2H), 7.49 (q,  $J = 8.0$  Hz, 1H), 7.74 (dd,  $J = 2.0$

and 8.5 Hz, 1H), 7.92 (dt,  $J = 2.5$  and  $11.5$  Hz, 1H), 8.03 (d,  $J = 2.0$  Hz, 1H), 8.43 (d,  $J = 9.0$  Hz, 2H), 8.81 (d,  $J = 2.5$  Hz, 1H), 10.02 (s, 1H);  $\delta_c$  (125 MHz, DMSO- $d_6$ ) 25.1, 55.8, 57.4, 79.0, 101.2, 109.1 (d,  $^2J_{CF} = 25.6$  Hz), 110.6 (d,  $^2J_{CF} = 20.8$  Hz), 114.4, 115.5, 117.4, 118.1 (d,  $^4J_{CF} = 1.9$  Hz), 124.1, 126.1, 128.6, 130.2, 130.5 (d,  $^3J_{CF} = 7.6$  Hz), 139.1, 141.2 (d,  $^3J_{CF} = 10.3$  Hz), 150.3, 157.4, 159.6, 162.1, 162.4 (d,  $^1J_{CF} = 239.8$  Hz);  $m/z$  492 (100,  $MH^+$ ); HRMS (ES):  $MH^+$ , found 492.0724.  $C_{25}H_{20}BrFN_3O_2^+$  requires 492.0723.

#### 1.4. Generalised Procedure for the One-Pot Three-Step Sequential Amination and Bis-Suzuki–Miyaura Cross-Coupling of **1a–d**

A stirred mixture of **1a** (0.50 g, 1.12 mmol), 3-fluoroaniline (0.14 g, 1.23 mmol) and concentrated HCl (0.01 g, 0.27 mmol) in 3:1 THF-isopropanol ( $v/v$ , 10 mL) in a two necked flask equipped with rubber septum and a condenser fitted with calcium chloride tube was heated at 70 °C for 5 h. After cooling, 4-methoxyphenylboronic acid (0.20 g, 1.34 mmol), Pd(PPh<sub>3</sub>)<sub>4</sub> (0.064 g, 0.056 mmol) and K<sub>2</sub>CO<sub>3</sub> (0.46 g, 3.36 mmol) were introduced to the mixture under argon atmosphere. A balloon filled with argon was fitted to the top of the condenser and the stirred mixture was heated at 70 °C for 3 h. A solution of 4-fluorophenylboronic acid (0.20 g, 1.45 mmol) in THF (5 mL) was then introduced via a syringe and heating was continued at this temperature under argon atmosphere for additional 3 h. The mixture was, in turn, quenched with an ice-cold water and the product was extracted into ethyl acetate. The combined organic layers were washed with water, dried over anhydrous MgSO<sub>4</sub>, filtered and evaporated under reduced pressure. The residue was purified by column chromatography on silica gel to afford **5a**. Compounds **5b–d** were also prepared in this fashion from their corresponding substrates.

*6-(4-Fluorophenyl)-N-(3-fluorophenyl)-8-(4-methoxyphenyl)-2-phenylquinazolin-4-amine (5a)*: Yellow solid (0.43 g, 75%),  $R_f$  (toluene) 0.41, mp. 206–207 °C;  $\nu_{max}$  (ATR) 500, 521, 617, 699, 811, 830, 1147, 1249, 1475, 1488, 1511, 1527, 1567, 1605, 2838, 2958, 3060, 3417  $cm^{-1}$ ;  $\delta_H$  (500 MHz, DMSO- $d_6$ ) 3.86 (s, 3H), 7.01 (td,  $J = 2.5$  and  $8.5$  Hz, 1H), 7.12 (d,  $J = 9.0$  Hz, 2H), 7.41 (t,  $J = 8.5$  Hz, 2H), 7.48–7.54 (m, 4H), 7.80 (dd,  $J = 2.0$  and  $8.5$  Hz, 1H), 7.86 (d,  $J = 8.5$  Hz, 2H), 8.00–8.04 (m, 3H), 8.15 (d,  $J = 2.0$  Hz, 1H), 8.35 (d,  $J = 8.0$  Hz, 2H), 8.78 (d,  $J = 2.0$  Hz, 1H), 10.11 (s, 1H);  $\delta_c$  (125 MHz, DMSO- $d_6$ ) 55.6, 109.2 (d,  $^2J_{CF} = 25.6$  Hz), 110.4 (d,  $^2J_{CF} = 20.8$  Hz), 113.6, 115.1, 116.2 (d,  $^2J_{CF} = 21.7$  Hz), 118.1 (d,  $^4J_{CF} = 2.8$  Hz), 119.6, 128.2, 128.9, 129.7, 129.8, 130.4 (d,  $^3J_{CF} = 9.5$  Hz), 130.8, 131.1, 132.2, 132.5, 136.2 (d,  $^4J_{CF} = 2.7$  Hz), 136.8, 138.8, 139.5, 141.6 (d,  $^3J_{CF} = 11.3$  Hz), 147.6, 158.5, 158.7, 159.3, 162.5 (d,  $^1J_{CF} = 239.8$  Hz), 162.6 (d,  $^1J_{CF} = 243.7$  Hz);  $m/z$  516 (100,  $MH^+$ ); HRMS (ES):  $MH^+$ , found 516.1895.  $C_{33}H_{24}F_2N_3O^+$  requires 516.1887.

*N-(3-Fluorophenyl)-2,6-bis(4-fluorophenyl)-8-(4-methoxyphenyl)quinazolin-4-amine (5b)*: Brown solid (0.44 g, 76%),  $R_f$  (toluene) 0.42, mp. 227–228 °C;  $\nu_{max}$  (ATR) 437, 527, 587, 750, 804, 824, 1141, 1181, 1213, 1247, 1507, 1574, 1596, 1617, 2926, 2956, 3460  $cm^{-1}$ ;  $\delta_H$  (500 MHz, DMSO- $d_6$ ) 3.84 (s, 3H), 7.00 (td,  $J = 2.5$  and  $8.0$  Hz, 1H), 7.09 (d,  $J = 8.5$  Hz, 2H), 7.32 (t,  $J = 8.5$  Hz, 2H), 7.38 (t,  $J = 8.5$  Hz, 2H), 7.49 (q,  $J = 8.0$  Hz, 1H), 7.75 (d,  $J = 8.0$  Hz, 1H), 7.82 (d,  $J = 8.5$  Hz, 2H), 7.93 (dt,  $J = 2.5$  and  $11.5$  Hz, 1H), 7.99 (t,  $J = 8.0$  Hz, 2H), 8.11 (d,  $J = 1.5$  Hz, 1H), 8.34 (t,  $J = 8.0$  Hz, 2H), 8.75 (d,  $J = 1.5$  Hz, 1H), 10.10 (s, 1H);  $\delta_c$  (125 MHz, DMSO- $d_6$ ) 55.6, 109.0 (d,  $^2J_{CF} = 25.6$  Hz), 110.5 (d,  $^2J_{CF} = 20.8$  Hz), 113.6, 115.0, 115.9 (d,  $^2J_{CF} = 20.8$  Hz), 116.2 (d,  $^2J_{CF} = 20.8$  Hz), 118.3 (d,  $^4J_{CF} = 2.7$  Hz), 119.7, 129.7 (d,  $^3J_{CF} = 7.6$  Hz), 130.4 (d,  $^3J_{CF} = 8.5$  Hz), 130.5 (d,  $^3J_{CF} = 9.5$  Hz), 131.0, 132.3, 132.5, 135.2 (d,  $^4J_{CF} = 2.7$  Hz), 136.2 (d,  $^4J_{CF} = 2.6$  Hz), 136.9, 139.5, 141.5 (d,  $^3J_{CF} = 11.3$  Hz), 147.5, 157.6, 158.7, 159.2, 162.5 (d,  $^1J_{CF} = 240.0$  Hz), 162.6 (d,  $^1J_{CF} = 243.6$  Hz), 164.1 (d,  $^1J_{CF} = 245.6$  Hz);  $m/z$  534 (100,  $MH^+$ ); HRMS (ES):  $MH^+$ , found 534.1793.  $C_{33}H_{23}F_3N_3O^+$  requires 534.1798.

*2-(4-Chlorophenyl)-N-(3-fluorophenyl)-6-(4-fluorophenyl)-8-(4-methoxyphenyl) quinazolin-4-amine (5c)*: Brown solid (0.38 g, 68%),  $R_f$  (toluene) 0.54, mp. 213–214 °C;  $\nu_{max}$  (ATR) 433, 521, 528, 553, 745, 803, 825, 1142, 1214, 1246, 1396, 1489, 1508, 1563, 1602, 2925, 2956, 3441  $cm^{-1}$ ;  $\delta_H$  (500 MHz, DMSO- $d_6$ ) 3.86 (s, 3H), 7.00 (td,  $J = 2.5$  and  $8.5$  Hz, 1H), 7.09 (d,  $J = 8.5$  Hz, 2H), 7.39 (t,  $J = 9.0$  Hz, 2H), 7.50 (q,  $J = 8.5$  Hz, 1H), 7.56 (d,  $J = 9.0$  Hz, 2H), 7.75 (d,  $J = 8.0$  Hz, 1H), 7.82 (d,  $J = 9.0$  Hz, 2H), 7.92 (dt,  $J = 2.5$  and  $11.5$  Hz, 1H), 8.00 (d,  $J = 9.0$  Hz, 2H), 8.13 (d,  $J = 2.5$  Hz, 1H), 8.30 (d,  $J = 8.0$  Hz, 2H), 8.75 (d,  $J = 2.5$  Hz, 1H), 10.11 (s, 1H);  $\delta_c$  (125 MHz, DMSO- $d_6$ ) 55.6, 109.3 (d,  $^2J_{CF} = 25.6$  Hz), 110.6 (d,  $^2J_{CF} = 20.8$  Hz), 113.7, 115.1, 116.2 (d,  $^2J_{CF} = 20.7$  Hz), 118.3 (d,  $^4J_{CF} = 2.8$  Hz), 119.6, 129.0, 129.7, 129.8, 129.8, 130.5 (d,  $^3J_{CF} = 9.1$

Hz), 131.0, 132.3, 132.5, 135.6, 136.2 (d,  $^4J_{CF} = 2.7$  Hz), 137.7, 139.5, 141.5 (d,  $^3J_{CF} = 11.3$  Hz), 147.4, 157.6, 158.7, 159.3, 162.5 (d,  $^1J_{CF} = 239.8$  Hz), 162.6 (d,  $^1J_{CF} = 243.7$  Hz);  $m/z$  550 (100, MH<sup>+</sup>); HRMS (ES): MH<sup>+</sup>, found 550.1516. C<sub>33</sub>H<sub>23</sub>ClF<sub>2</sub>N<sub>3</sub>O<sup>+</sup> requires 550.1498.

*N*-(3-Fluorophenyl)-6-(4-fluorophenyl)-2,8-bis(4-methoxyphenyl)quinazolin-4-amine (**5d**): Brown solid (0.37 g, 66%),  $R_f$  (9:1 toluene-ethyl acetate) 0.71, mp. 196–197 °C;  $\nu_{max}$  (ATR) 520, 591, 770, 802, 822, 1033, 1157, 1244, 1401, 1415, 1506, 1604, 2834, 2905, 2932, 3454 cm<sup>-1</sup>;  $\delta_H$  (500 MHz, DMSO-*d*<sub>6</sub>) 3.80 (s, 3H), 3.85 (s, 3H), 6.99 (td,  $J = 1.5$  and 8.5 Hz, 1H), 7.04 (d,  $J = 8.5$  Hz, 2H), 7.09 (d,  $J = 8.5$  Hz, 2H), 7.38 (t,  $J = 8.5$  Hz, 2H), 7.49 (q,  $J = 8.0$  Hz, 1H), 7.77 (dd,  $J = 1.5$  and 8.0 Hz, 1H), 7.83 (d,  $J = 8.5$  Hz, 2H), 7.97–8.00 (m, 3H), 8.09 (d,  $J = 1.5$  Hz, 1H), 8.27 (d,  $J = 9.0$  Hz, 2H), 8.73 (d,  $J = 1.5$  Hz, 1H), 10.03 (s, 1H);  $\delta_c$  (125 MHz, DMSO-*d*<sub>6</sub>) 55.6, 55.7, 109.1 (d,  $^2J_{CF} = 25.6$  Hz), 110.3 (d,  $^2J_{CF} = 20.8$  Hz), 113.6, 114.3, 114.8, 116.2 (d,  $^2J_{CF} = 21.8$  Hz), 118.1 (d,  $^4J_{CF} = 2.7$  Hz), 119.6, 129.7, 129.8, 129.9, 130.4 (d,  $^3J_{CF} = 9.5$  Hz), 131.2 (d,  $^3J_{CF} = 11.3$  Hz), 132.2, 132.5, 136.3 (d,  $^4J_{CF} = 2.8$  Hz), 136.4, 139.2, 141.7 (d,  $^3J_{CF} = 10.3$  Hz), 147.5, 158.4, 158.5, 159.2, 161.6, 162.5 (d,  $^1J_{CF} = 239.8$  Hz), 162.6 (d,  $^1J_{CF} = 243.6$  Hz);  $m/z$  546 (100, MH<sup>+</sup>); HRMS (ES): MH<sup>+</sup>, found 546.1992. C<sub>33</sub>H<sub>24</sub>F<sub>2</sub>N<sub>3</sub>O<sup>+</sup> requires 546.1993.

### 1.5. Generalised Procedure for the One-Pot Three-Step Sequential Amination and Subsequent Sonogashira and Stille Cross-Coupling of **1a–d**

A stirred mixture of **1a** (0.30 g, 0.67 mmol), 3-fluoroaniline (0.082 g, 0.74 mmol) and concentrated HCl (0.01 g, 0.27 mmol) in 3:1 THF-isopropanol (*v/v*, 10 mL) in a two necked flask equipped with rubber septum and a condenser fitted with calcium chloride tube was heated at 70 °C for 5 h. After cooling to RT, Pd(PPh<sub>3</sub>)<sub>4</sub> (0.040 g, 0.03 mmol), CuI (0.006 g, 0.033 mmol), K<sub>2</sub>CO<sub>3</sub> (0.28 g, 2.01 mmol) and phenylacetylene (0.08 g, 0.80 mmol) in THF (5 mL) were introduced to the mixture under argon atmosphere. A balloon filled with argon was connected to the top of the condenser and stirring was continued for additional 18 h at r.t. under argon atmosphere. A solution of tributylstannylfuran (0.29 g, 0.80 mmol) in THF (5 mL) was introduced to the mixture via a syringe and the stirred mixture was, in turn, heated at 70 °C for 1 h. The mixture was quenched with an ice-cold water and the product was extracted into ethyl acetate. The combined organic layers were washed with water, dried over anhydrous MgSO<sub>4</sub>, filtered and evaporated under reduced pressure. The residue was purified by column chromatography on silica gel to afford **6a**. Compounds **6a–d** were also prepared in this fashion.

*N*-(3-Fluorophenyl)-6-(furan-2-yl)-2-phenyl-8-(phenylethynyl)quinazolin-4-amine (**6a**): Yellow solid (0.16 g, 51%),  $R_f$  (toluene) 0.35, mp. 117–119 °C;  $\nu_{max}$  (ATR) 519, 590, 675, 688, 754, 861, 983, 1148, 1352, 1399, 1488, 1526, 1562, 1615, 2208, 2852, 2923, 3442 cm<sup>-1</sup>;  $\delta_H$  (500 MHz, DMSO-*d*<sub>6</sub>) 6.72 (dd,  $J = 2.0$  and 3.5 Hz, 1H), 7.01 (td,  $J = 2.5$  and 8.5 Hz, 1H), 7.26 (d,  $J = 3.5$  Hz, 1H), 7.47–7.59 (m, 7H), 7.70 (dd,  $J = 2.0$  and 8.0 Hz, 2H), 7.79 (d,  $J = 8.0$  Hz, 1H), 7.91 (d,  $J = 2.0$  Hz, 1H), 7.96 (dt,  $J = 2.5$  and 11.5 Hz, 1H), 8.44 (d,  $J = 2.0$  Hz, 1H), 8.51 (dd,  $J = 2.0$  and 8.5 Hz, 2H), 8.86 (d,  $J = 2.0$  Hz, 1H), 10.23 (s, 1H);  $\delta_c$  (125 MHz, DMSO-*d*<sub>6</sub>) 87.5, 95.9, 108.3, 109.5 (d,  $^2J_{CF} = 25.5$  Hz), 110.7 (d,  $^2J_{CF} = 21.7$  Hz), 113.1, 115.0, 117.6, 118.4 (d,  $^4J_{CF} = 2.8$  Hz), 122.6, 123.1, 128.0, 128.3, 129.1, 129.4, 129.5, 130.5 (d,  $^3J_{CF} = 9.5$  Hz), 131.1, 131.9, 132.6, 138.3 (d,  $^4J_{CF} = 2.8$  Hz), 141.4 (d,  $^3J_{CF} = 10.5$  Hz), 144.3, 150.4, 152.2, 158.4, 159.3, 162.4 (d,  $^1J_{CF} = 239.8$  Hz);  $m/z$  482 (100, MH<sup>+</sup>); HRMS (ES): MH<sup>+</sup>, found 482.1670. C<sub>32</sub>H<sub>20</sub>FN<sub>3</sub>O<sup>+</sup> requires 482.1669.

*N*-(3-Fluorophenyl)-2-(4-fluorophenyl)-6-(furan-2-yl)-8-(phenylethynyl)quinazolin-4-amine (**6b**): Yellow solid (0.19 g, 60%),  $R_f$  (toluene) 0.41, mp. 175–178 °C;  $\nu_{max}$  (ATR) 449, 521, 571, 590, 675, 690, 733, 757, 984, 1018, 1147, 1218, 1397, 1488, 1509, 1525, 1567, 1616, 3053, 3437 cm<sup>-1</sup>;  $\delta_H$  (500 MHz, DMSO-*d*<sub>6</sub>) 6.71 (dd,  $J = 1.5$  and 3.5 Hz, 1H), 7.01 (td,  $J = 2.0$  and 8.0 Hz, 1H), 7.25 (d,  $J = 3.5$  Hz, 1H), 7.39 (t,  $J = 9.0$  Hz, 2H), 7.44–7.54 (m, 4H), 7.70 (dd,  $J = 2.0$  and 8.0 Hz, 2H), 7.76 (dd,  $J = 2.0$  and 8.0 Hz, 1H), 7.90 (d,  $J = 2.0$  Hz, 1H), 7.91 (dt,  $J = 2.5$  and 11.5 Hz, 1H), 8.43 (d,  $J = 2.0$  Hz, 1H), 8.51 (t,  $J = 8.5$  Hz, 2H), 8.85 (d,  $J = 2.0$  Hz, 1H), 10.23 (s, 1H);  $\delta_c$  (125 MHz, DMSO-*d*<sub>6</sub>) 87.4, 95.9, 108.3, 109.6 (d,  $^2J_{CF} = 26.5$  Hz), 110.8 (d,  $^2J_{CF} = 20.8$  Hz), 113.1, 114.9, 116.0 (d,  $^2J_{CF} = 21.8$  Hz), 117.6, 118.5 (d,  $^4J_{CF} = 2.7$  Hz), 122.6, 123.0, 128.0, 129.4, 129.5, 130.5 (d,  $^3J_{CF} = 9.5$  Hz), 130.6 (d,  $^3J_{CF} = 9.5$  Hz), 131.9, 132.5 (d,  $^4J_{CF} = 2.8$  Hz), 134.8 (d,  $^4J_{CF} = 2.8$  Hz), 141.3 (d,  $^3J_{CF} = 10.5$  Hz), 144.3, 150.3, 152.2, 158.5, 158.6, 162.4 (d,  $^1J_{CF} = 239.8$  Hz), 164.3 (d,  $^1J_{CF} = 246.6$  Hz);  $m/z$  500 (100, MH<sup>+</sup>); HRMS (ES): MH<sup>+</sup>, found 500.1575. C<sub>32</sub>H<sub>20</sub>F<sub>2</sub>N<sub>3</sub>O<sup>+</sup> requires 500.1574.

2-(4-Chlorophenyl)-N-(3-fluorophenyl)-6-(furan-2-yl)-8-(phenylethynyl)quinazolin-4-amine (**6c**): Yellow solid (0.17 g, 53%),  $R_f$  (toluene) 0.42, mp. 212–214 °C;  $\nu_{\max}$  (ATR) 491, 588, 674, 683, 740, 753, 800, 1013, 1086, 1147, 1349, 1394, 1488, 1526, 1559, 1583, 1615, 2211, 3447  $\text{cm}^{-1}$ ;  $\delta_H$  (500 MHz, DMSO- $d_6$ ) 6.72 (dd,  $J = 2.0$  and 3.5 Hz, 1H), 7.02 (td,  $J = 2.0$  and 8.0 Hz, 1H), 7.25 (d,  $J = 3.5$  Hz, 1H), 7.46–7.55 (m, 4H), 7.63 (d,  $J = 8.0$  Hz, 2H), 7.70 (dd,  $J = 2.0$  and 8.0 Hz, 2H), 7.77 (dd,  $J = 2.0$  and 8.0 Hz, 1H), 7.90 (dt,  $J = 2.5$  and 11.5 Hz, 1H), 7.91 (d,  $J = 2.0$  Hz, 1H), 8.43 (d,  $J = 2.0$  Hz, 1H), 8.47 (d,  $J = 9.0$  Hz, 2H), 8.85 (d,  $J = 2.0$  Hz, 1H), 10.25 (s, 1H);  $\delta_C$  (125 MHz, DMSO- $d_6$ ) 87.4, 95.9, 108.4, 109.6 (d,  $^2J_{CF} = 25.6$  Hz), 110.8 (d,  $^2J_{CF} = 20.8$  Hz), 113.1, 115.0, 117.6, 118.5 (d,  $^4J_{CF} = 2.7$  Hz), 122.6, 123.0, 128.1, 128.6, 129.2, 129.4, 129.9, 130.5 (d,  $^3J_{CF} = 9.5$  Hz), 131.9, 132.7 (d,  $^4J_{CF} = 2.8$  Hz), 135.9, 137.2, 141.3 (d,  $^3J_{CF} = 10.3$  Hz), 144.3, 150.3, 152.2, 158.4, 158.5, 162.4 (d,  $^1J_{CF} = 239.8$  Hz);  $m/z$  516 (100,  $\text{MH}^+$ ); HRMS (ES):  $\text{MH}^+$ , found 516.1200.  $\text{C}_{32}\text{H}_{19}\text{ClFN}_3\text{O}^+$  requires 516.1201.

N-(3-Fluorophenyl)-6-(furan-2-yl)-2-(4-methoxyphenyl)-8-(phenylethynyl)quinazolin-4-amine (**6d**): Yellow solid (0.20 g, 65%),  $R_f$  (9:1 toluene/ethyl acetate) 0.70, mp. 220–223 °C;  $\nu_{\max}$  (ATR)  $\text{cm}^{-1}$ ;  $\delta_H$  (500 MHz, DMSO- $d_6$ ) 3.84 (s, 3H), 6.71 (s, 1H), 7.01 (td,  $J = 2.5$  and 8.5 Hz, 1H), 7.12 (d,  $J = 8.5$  Hz, 2H), 7.23 (s, 1H), 7.48–7.52 (m, 4H), 7.70 (d,  $J = 8.0$  Hz, 2H), 7.77 (d,  $J = 8.0$  Hz, 1H), 7.90 (s, 1H), 7.96 (dt,  $J = 2.5$  and 11.5 Hz, 1H), 8.41 (s, 1H), 8.45 (d,  $J = 9.0$  Hz, 2H), 8.84 (s, 1H), 10.17 (s, 1H);  $\delta_C$  (125 MHz, DMSO- $d_6$ ) 55.8, 87.6, 95.7, 108.0, 109.4 (d,  $^2J_{CF} = 25.6$  Hz), 110.5 (d,  $^2J_{CF} = 19.8$  Hz), 113.0, 114.5, 114.7, 117.7, 118.3 (d,  $^4J_{CF} = 2.7$  Hz), 122.3, 123.1, 127.5, 129.4, 130.0, 130.4, 130.5 (d,  $^3J_{CF} = 9.5$  Hz), 130.8, 131.9, 136.3 (d,  $^4J_{CF} = 2.8$  Hz), 141.4 (d,  $^3J_{CF} = 10.3$  Hz), 144.2, 150.6, 152.3, 158.3, 159.2, 162.0, 162.4 (d,  $^1J_{CF} = 239.8$  Hz);  $m/z$  512 (100,  $\text{MH}^+$ ); HRMS (ES):  $\text{MH}^+$ , found 512.1776.  $\text{C}_{33}\text{H}_{23}\text{FN}_3\text{O}_2^+$  requires 512.1774.

#### 1.6. Generalised Procedure for the One-Pot Three-Step Sequential Amination, Sonogashira and Suzuki–Miyaura Cross-Coupling of **1b–d**

A stirred mixture of **1b** (0.30 g, 0.67 mmol), 3-fluoroaniline (0.08 g, 0.74 mmol) and concentrated HCl (0.01 g, 0.27 mmol) in 3:1 THF-isopropanol ( $v/v$ , 10 mL) in a two necked flask equipped with rubber septum and a condenser fitted with calcium chloride tube was heated at 70 °C for 5 h. After cooling to RT, Pd(PPh<sub>3</sub>)<sub>4</sub> (0.04 g, 0.03 mmol), CuI (0.006 g, 0.033 mmol), K<sub>2</sub>CO<sub>3</sub> (0.28 g, 2.01 mmol) and phenylacetylene (0.08 g, 0.80 mmol) in THF (5 mL) were introduced to the mixture under argon atmosphere. An argon-filled balloon was connected to the top of the condenser and the mixture was stirred for additional 18 h at r.t. under argon atmosphere. A solution of 4-fluorophenylboronic acid (0.11 g, 0.80 mmol) in water (5 mL) was introduced via a syringe and the stirred mixture was, in turn, heated at 70 °C for 2 h followed by quenching with an ice-cold water. The product was extracted into ethyl acetate and the combined organic layers were washed with water, dried over anhydrous MgSO<sub>4</sub>, filtered and evaporated under reduced pressure. The residue was purified by column chromatography on silica gel to afford **7a**. Compounds **7b** and **7c** were also prepared in this fashion from their corresponding substrates.

N-(3-Fluorophenyl)-2,6-bis(4-fluorophenyl)-8-(phenylethynyl)quinazolin-4-amine (**7a**): Yellow solid (0.20 g, 59%),  $R_f$  (toluene) 0.51, mp. 225–227 °C;  $\nu_{\max}$  (ATR) 518, 542, 589, 689, 753, 801, 837, 1152, 1207, 1411, 1444, 1508, 1529, 1568, 1596, 1619, 3452  $\text{cm}^{-1}$ ;  $\delta_H$  (500 MHz, DMSO- $d_6$ ) 7.03 (td,  $J = 2.5$  and 8.0 Hz, 1H), 7.41 (t,  $J = 9.0$  Hz, 4H), 7.47–7.51 (m, 4H), 7.70 (d,  $J = 8.0$  Hz, 2H), 7.75 (d,  $J = 8.5$  Hz, 1H), 7.91 (dt,  $J = 2.5$  and 11.5 Hz, 1H), 7.99 (t,  $J = 8.0$  Hz, 2H), 8.41 (d,  $J = 1.5$  Hz, 1H), 8.54 (t,  $J = 8.5$  Hz, 2H), 8.83 (d,  $J = 1.5$  Hz, 1H), 10.19 (s, 1H);  $\delta_C$  (125 MHz, DMSO- $d_6$ ) 87.8, 95.8, 109.6 (d,  $^2J_{CF} = 25.5$  Hz), 110.8 (d,  $^2J_{CF} = 20.8$  Hz), 114.8, 116.0 (d,  $^2J_{CF} = 21.8$  Hz), 116.3 (d,  $^2J_{CF} = 20.8$  Hz), 118.5 (d,  $^4J_{CF} = 1.9$  Hz), 121.5, 122.5, 123.1, 129.4, 129.5, 129.7, 130.0, 130.5 (d,  $^3J_{CF} = 9.4$  Hz), 130.6 (d,  $^3J_{CF} = 11.3$  Hz), 131.9, 134.9 (d,  $^4J_{CF} = 2.8$  Hz), 135.3 (d,  $^4J_{CF} = 3.7$  Hz), 135.7, 136.7, 141.2 (d,  $^3J_{CF} = 10.3$  Hz), 158.6, 158.7, 162.4 (d,  $^1J_{CF} = 232.3$  Hz), 162.7 (d,  $^1J_{CF} = 243.6$  Hz), 164.4 (d,  $^1J_{CF} = 239.0$  Hz);  $m/z$  528 (100,  $\text{MH}^+$ ); HRMS (ES):  $\text{MH}^+$ , found 528.1693.  $\text{C}_{34}\text{H}_{21}\text{F}_3\text{N}_3^+$  requires 528.1688.

2-(4-Chlorophenyl)-N-(3-fluorophenyl)-6-(4-fluorophenyl)-8-(phenylethynyl)quinazolin-4-amine (**7b**): Yellow solid (0.19 g, 56%),  $R_f$  (toluene) 0.57, mp. 218–219 °C;  $\nu_{\max}$  (ATR) 515, 543, 564, 689, 753, 799, 830, 1013, 1087, 1160, 1234, 1408, 1489, 1510, 1530, 1561, 1602, 1615, 3452  $\text{cm}^{-1}$ ;  $\delta_H$  (500 MHz, DMSO- $d_6$ ) 7.03 (td,  $J = 2.5$  and 8.5 Hz, 1H), 7.41 (t,  $J = 9.0$  Hz, 2H), 7.47–7.51 (m, 4H), 7.65 (d,  $J = 8.5$  Hz, 2H),

7.70 (d,  $J = 8.0$  Hz, 2H), 7.74 (d,  $J = 9.0$  Hz, 1H), 7.89 (dt,  $J = 2.5$  and  $11.5$  Hz, 1H), 8.00 (t,  $J = 8.5$  Hz, 2H), 8.42 (d,  $J = 1.5$  Hz, 1H), 8.49 (d,  $J = 8.5$  Hz, 2H), 8.84 (d,  $J = 1.5$  Hz, 1H), 10.22 (s, 1H);  $\delta_c$  (125 MHz, DMSO- $d_6$ ) 87.7, 95.9, 109.6 (d,  $^2J_{CF} = 25.5$  Hz), 110.9 (d,  $^2J_{CF} = 20.8$  Hz), 114.9, 116.4 (d,  $^2J_{CF} = 21.8$  Hz), 118.5 (d,  $^4J_{CF} = 2.7$  Hz), 121.5, 122.5, 123.1, 129.2, 129.4, 129.5, 129.7 (d,  $^3J_{CF} = 8.6$  Hz), 130.0, 130.6 (d,  $^3J_{CF} = 9.5$  Hz), 131.9, 135.4 (d,  $^4J_{CF} = 2.8$  Hz), 135.5 (d,  $^4J_{CF} = 3.7$  Hz), 136.0, 136.9, 137.3, 141.1 (d,  $^3J_{CF} = 11.3$  Hz), 150.3, 158.6, 158.7, 162.5 (d,  $^1J_{CF} = 240.8$  Hz), 162.8 (d,  $^1J_{CF} = 244.6$  Hz);  $m/z$  544 (100,  $MH^+$ ); HRMS (ES):  $MH^+$ , found 544.1393.  $C_{34}H_{21}ClF_2N_3^+$  requires 544.1392.

*N*-(3-Fluorophenyl)-6-(4-fluorophenyl)-2-(4-methoxyphenyl)-8-(phenylethynyl)-quinazolin-4-amine (7c): Yellow solid (0.20 g, 62%),  $R_f$  (9:1 toluene/ethyl acetate) 0.76, mp. 236–237 °C;  $\nu_{max}$  (ATR)  $cm^{-1}$ ;  $\delta_H$  (500 MHz, DMSO- $d_6$ ) 3.84 (s, 3H), 7.01 (td,  $J = 2.5$  and  $8.5$  Hz, 1H), 7.12 (d,  $J = 8.5$  Hz, 2H), 7.40 (t,  $J = 8.5$  Hz, 2H), 7.47–7.55 (m, 4H), 7.70 (dd,  $J = 1.5$  and  $8.0$  Hz, 2H), 7.75 (d,  $J = 8.0$  Hz, 1H), 7.93–8.01 (m, 3H), 8.39 (d,  $J = 2.0$  Hz, 1H), 8.47 (d,  $J = 8.5$  Hz, 2H), 8.81 (d,  $J = 2.0$  Hz, 1H), 10.13 (s, 1H);  $\delta_c$  (125 MHz, DMSO- $d_6$ ) 55.8 87.9, 95.0, 109.4 (d,  $^2J_{CF} = 25.6$  Hz), 110.6 (d,  $^2J_{CF} = 20.8$  Hz), 114.5, 114.6, 116.3 (d,  $^2J_{CF} = 20.8$  Hz), 118.3 (d,  $^4J_{CF} = 2.7$  Hz), 121.5, 122.3, 123.2, 129.4, 129.5, 129.6 (d,  $^3J_{CF} = 7.6$  Hz), 130.1, 130.5 (d,  $^3J_{CF} = 9.5$  Hz), 130.8, 131.9, 135.4 (d,  $^4J_{CF} = 2.8$  Hz), 135.5 (d,  $^4J_{CF} = 3.7$  Hz), 136.2, 141.4 (d,  $^3J_{CF} = 11.3$  Hz), 150.6, 158.4, 159.4, 162.0, 162.5 (d,  $^1J_{CF} = 239.8$  Hz), 162.7 (d,  $^1J_{CF} = 243.6$  Hz);  $m/z$  540 (100,  $MH^+$ ); HRMS (ES):  $MH^+$ , found 540.1882.  $C_{35}H_{24}F_2N_3O^+$  requires 540.1887.

## 2. $^1H$ - and $^{13}C$ NMR Spectra of Compounds 2–7

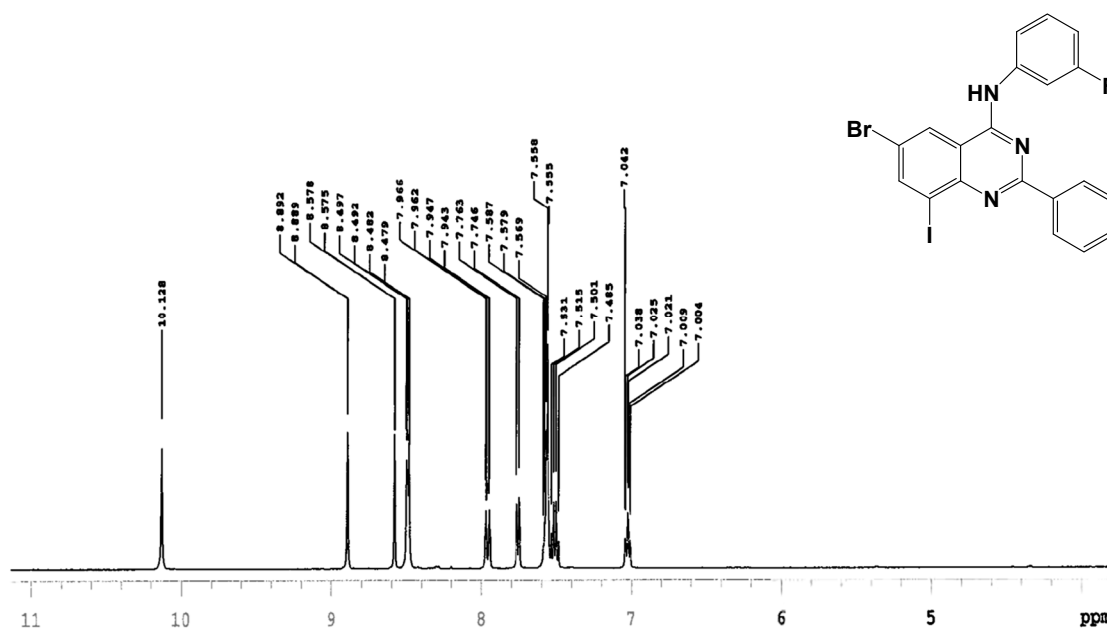

Figure S1.  $^1H$ -NMR Spectrum of Compound 2a.

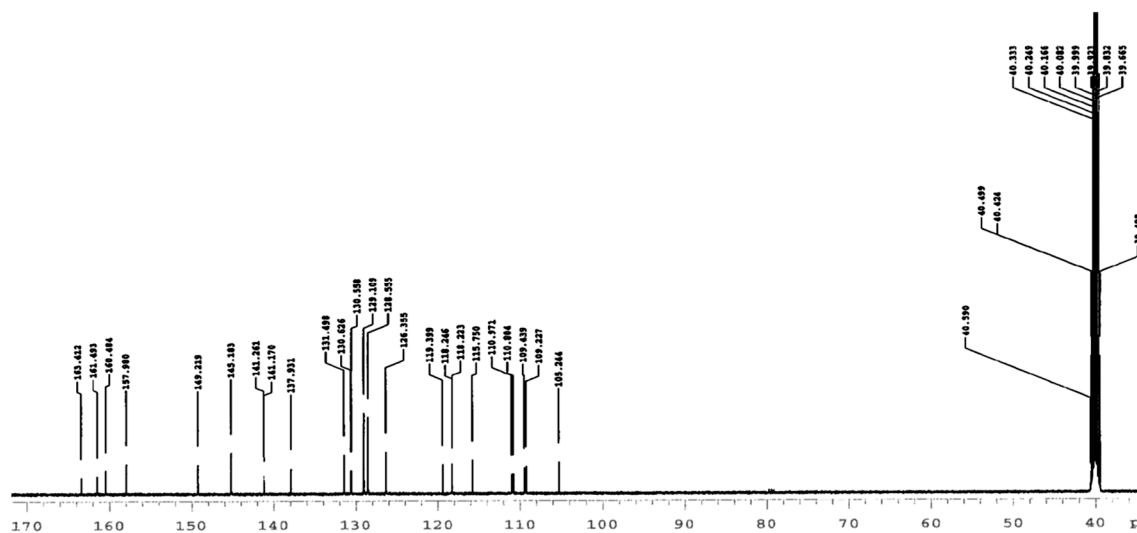Figure S2. <sup>13</sup>C NMR Spectrum of Compound 2a.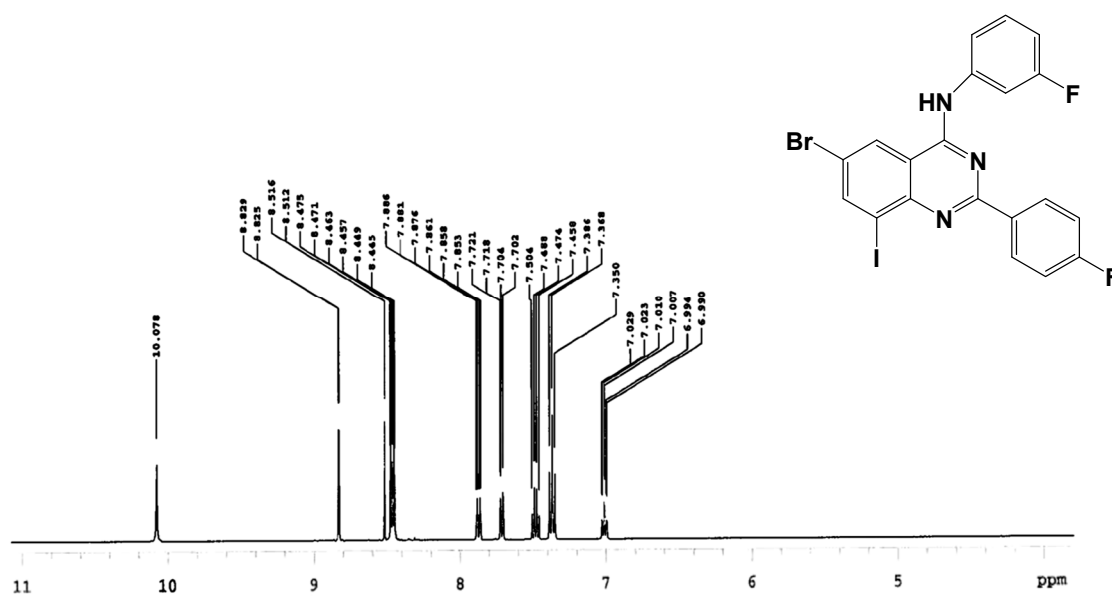Figure S3. <sup>1</sup>H NMR Spectrum of Compound 2b.



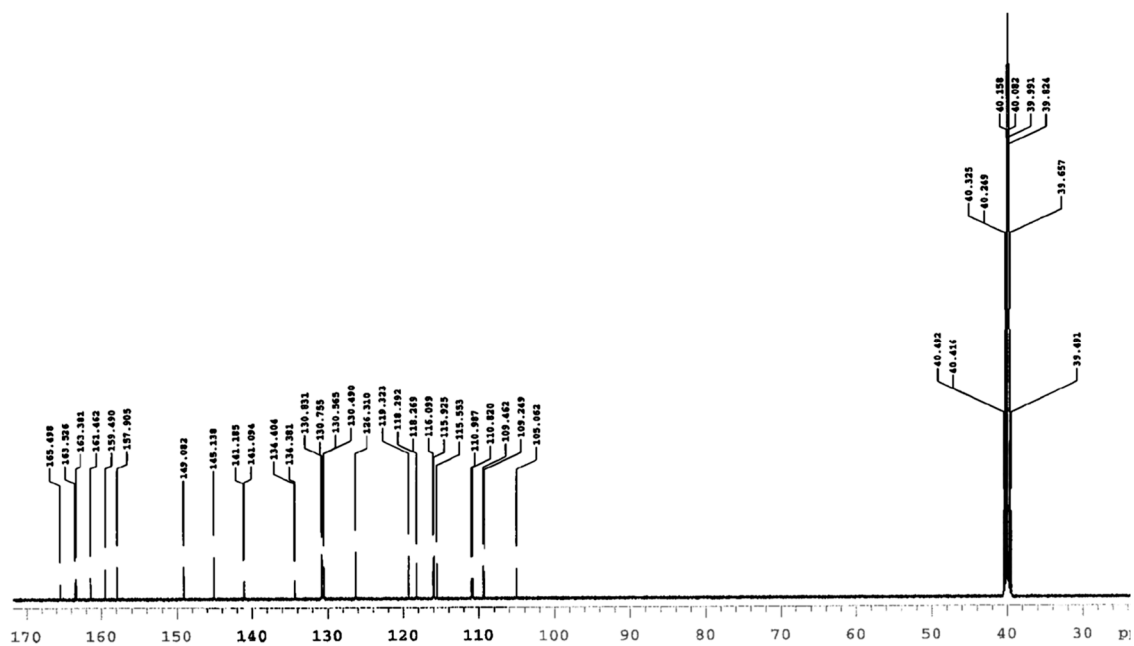Figure S4. <sup>13</sup>C NMR Spectrum of Compound 2b.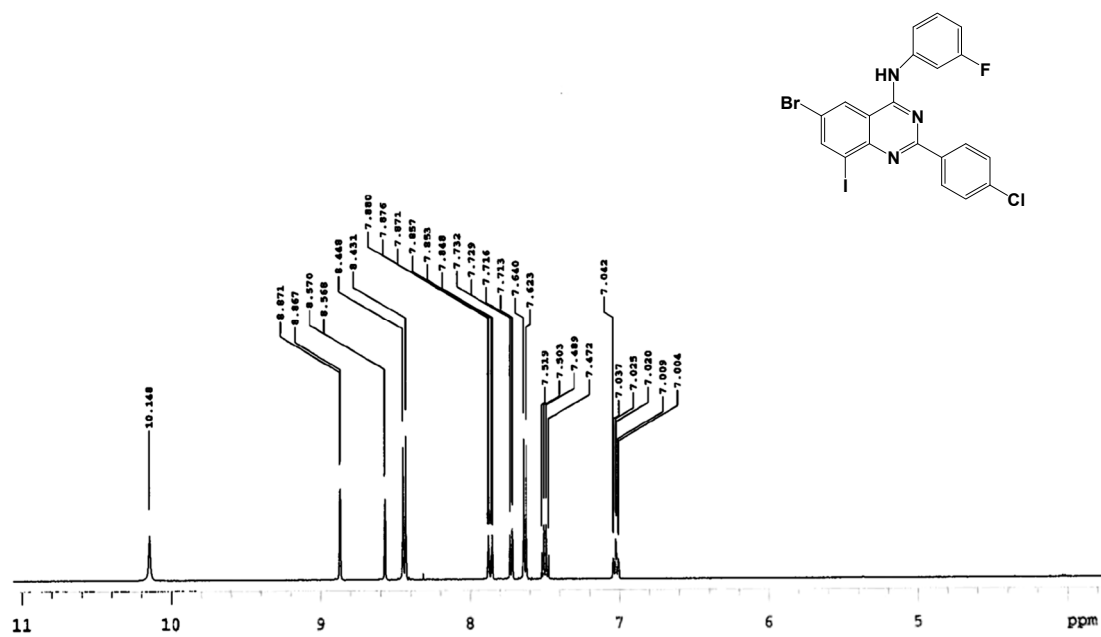Figure S5. <sup>1</sup>H NMR Spectrum of Compound 2c

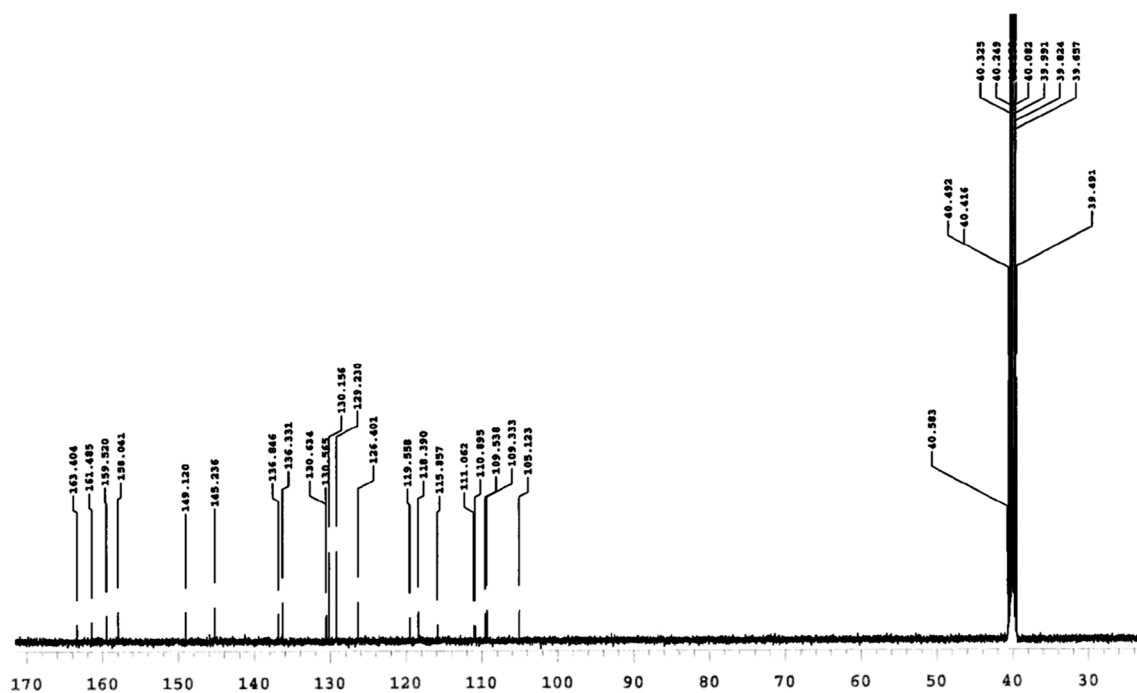Figure S6.  $^{13}\text{C}$  NMR Spectrum of Compound 2c.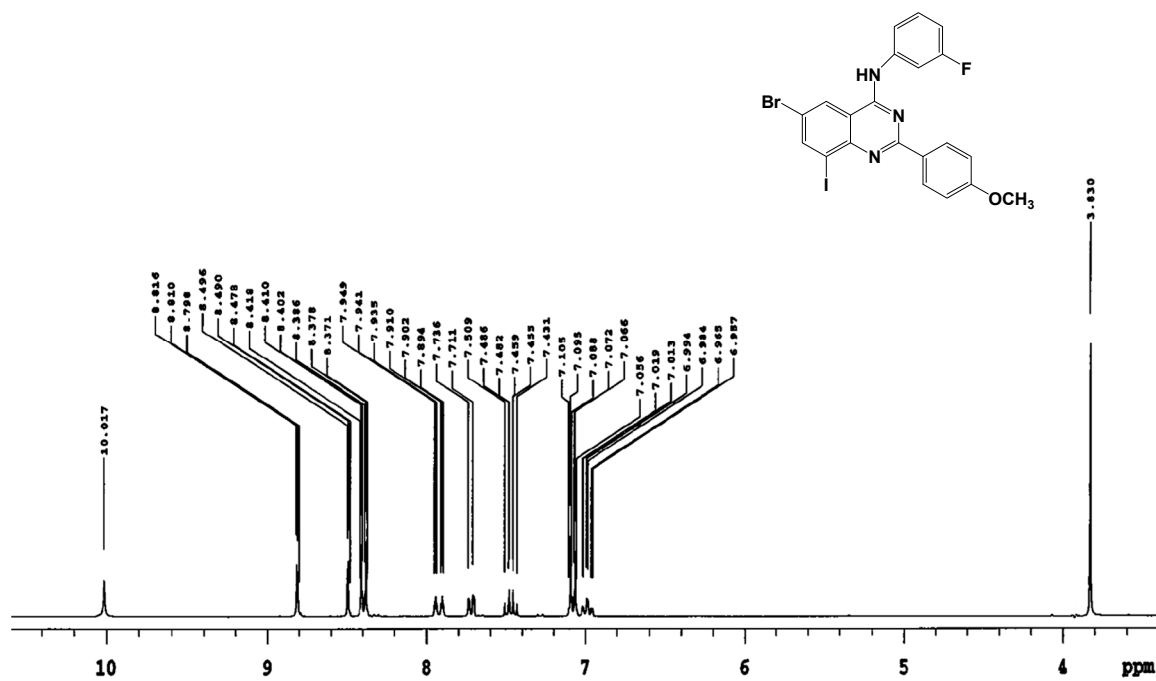Figure S7.  $^1\text{H}$  NMR Spectrum of Compound 2d.

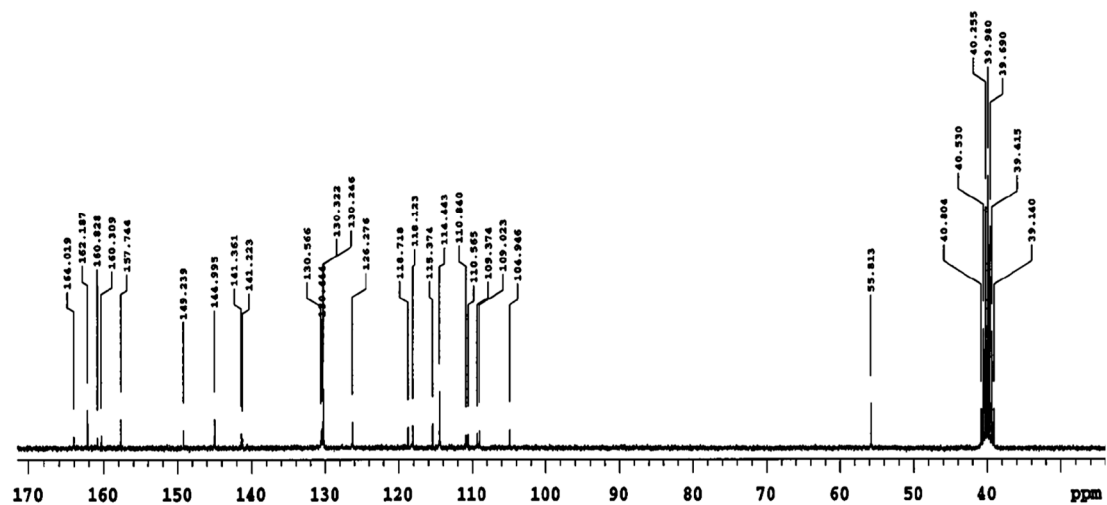Figure S8. <sup>13</sup>C NMR Spectrum of Compound 2d.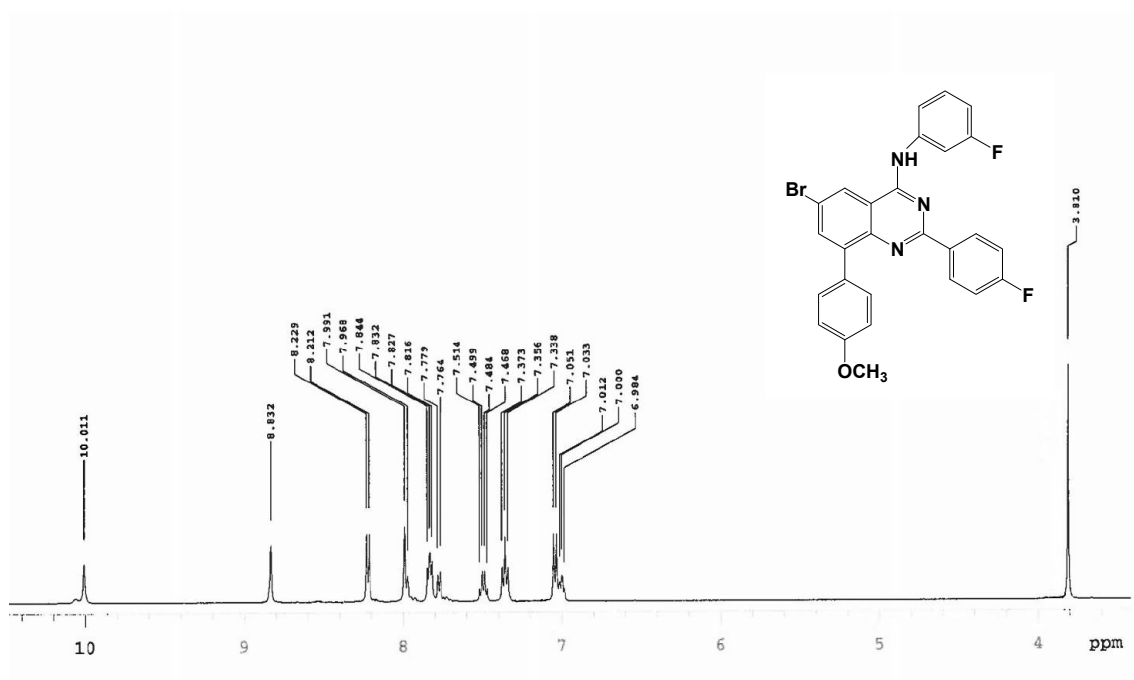Figure S9. <sup>1</sup>H-NMR Spectrum of Compound 3a.



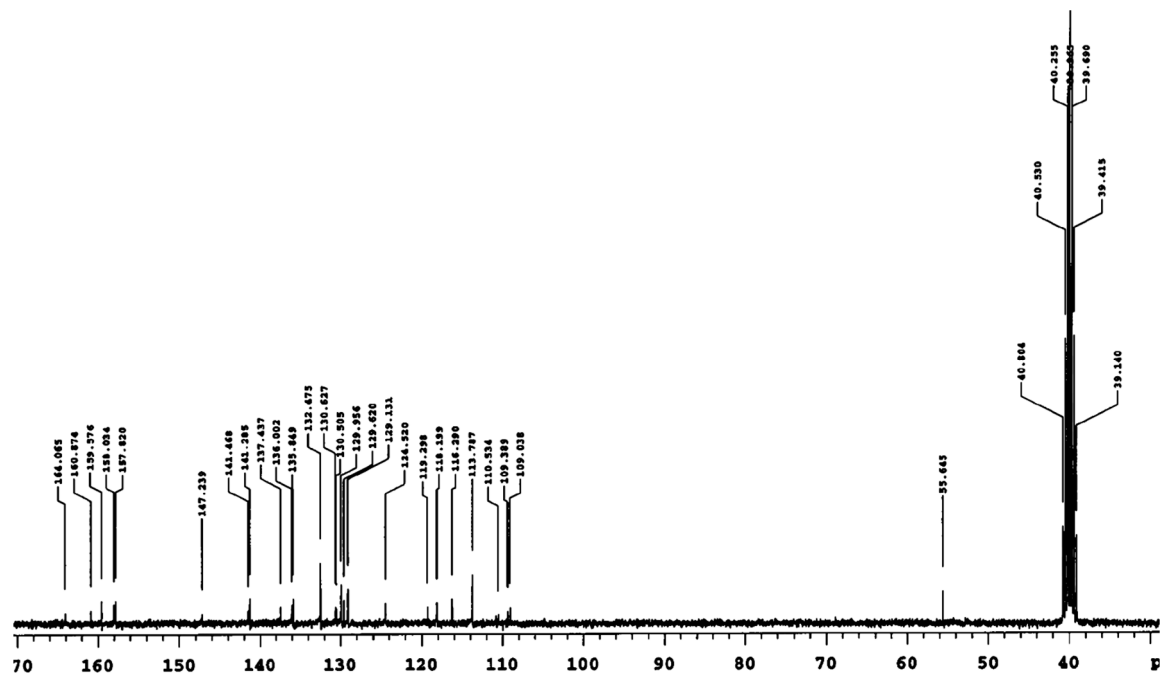Figure S12. <sup>13</sup>C NMR Spectrum of Compound 3c.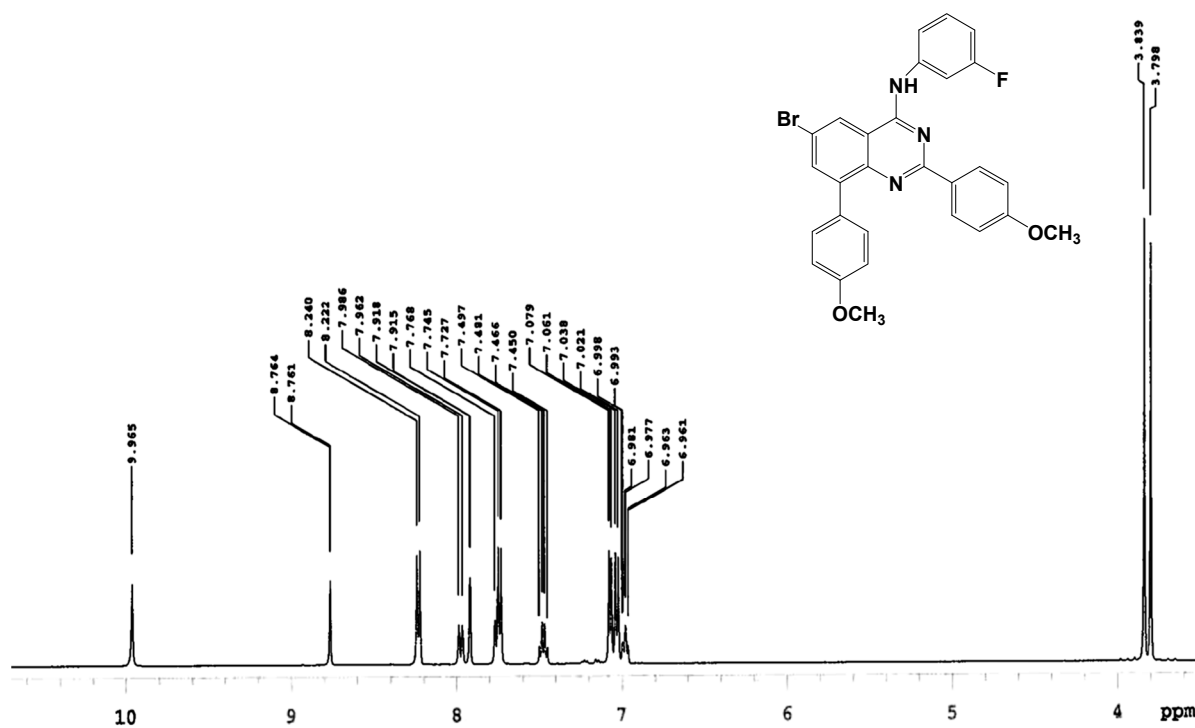Figure S13. <sup>1</sup>H NMR Spectrum of Compound 3d.

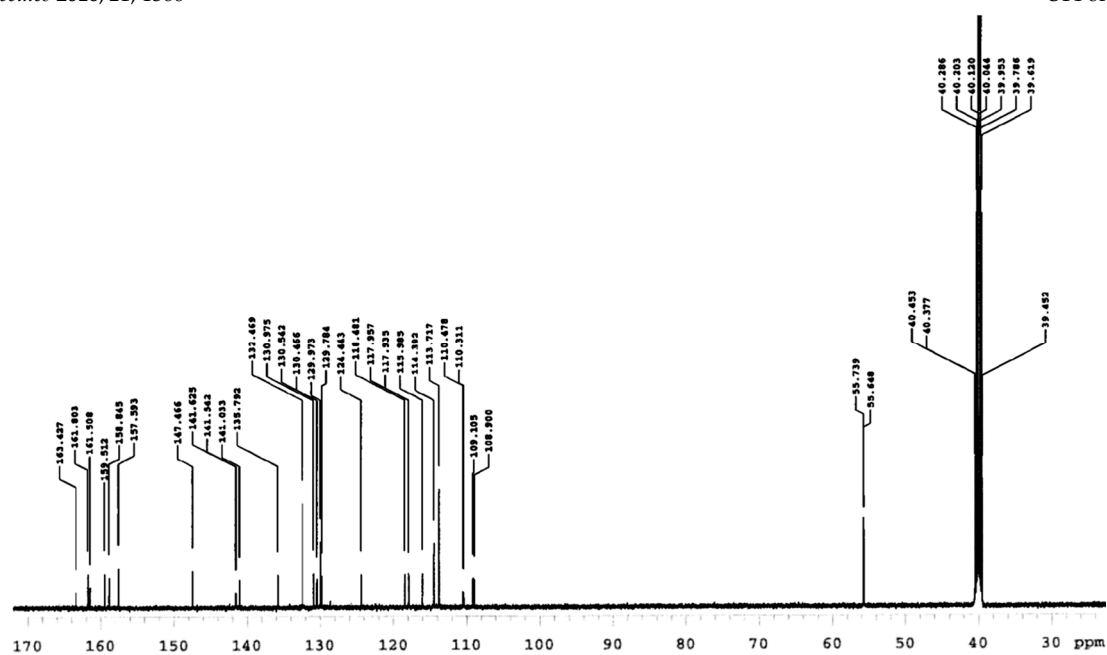Figure S14. <sup>13</sup>C NMR Spectrum of Compound 3d.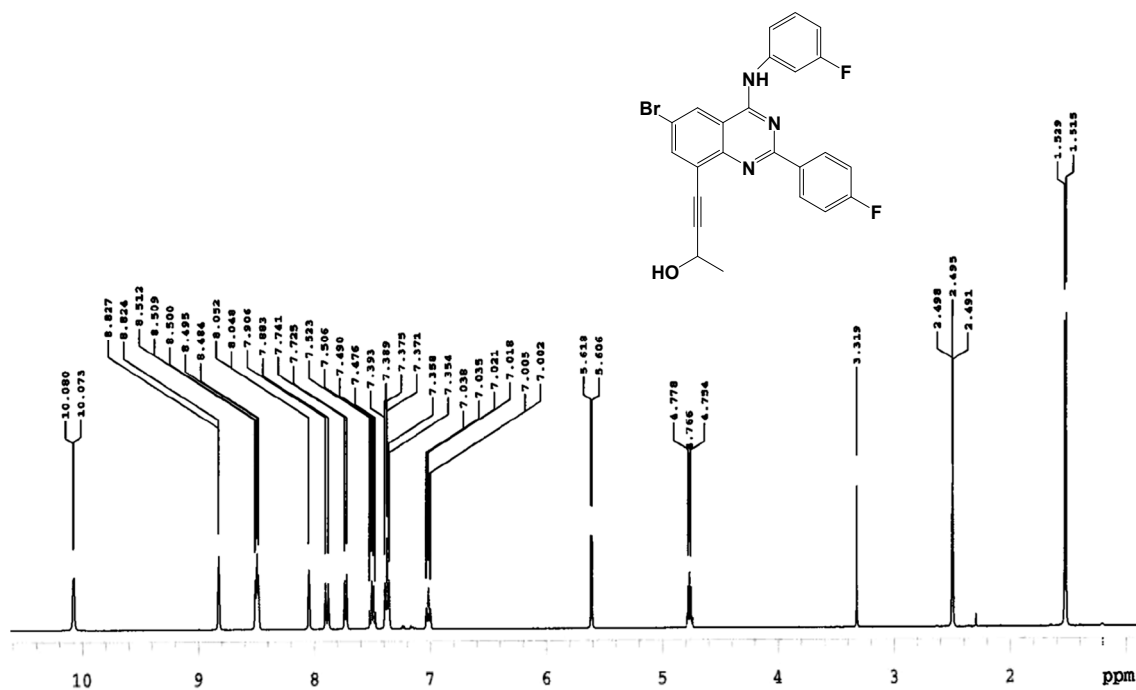Figure S15. <sup>1</sup>H NMR Spectrum of Compound 4b.

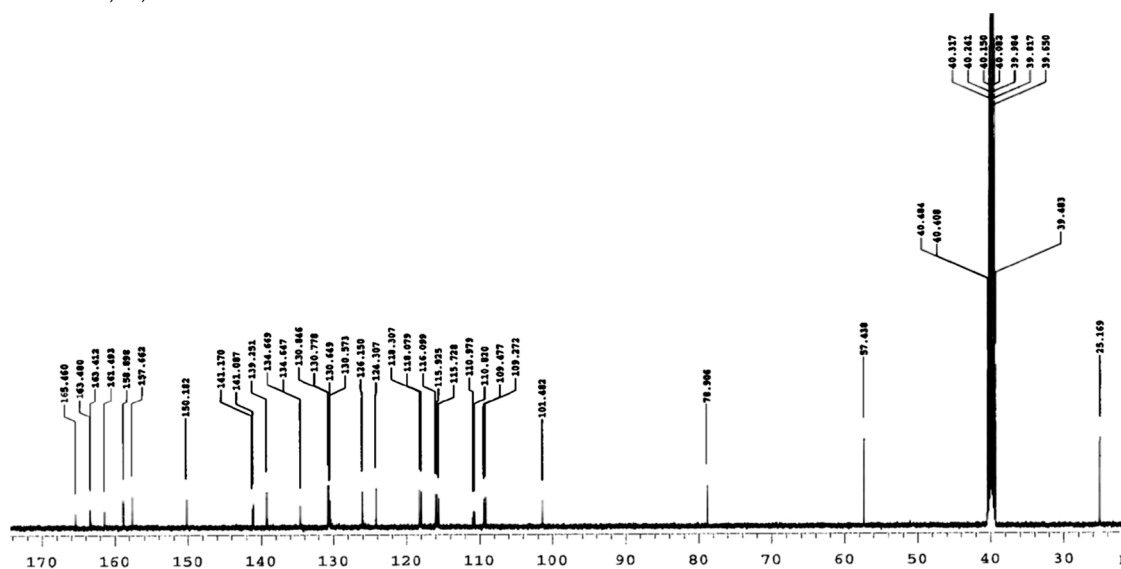Figure S16.  $^{13}\text{C}$ -NMR Spectrum of Compound 4b.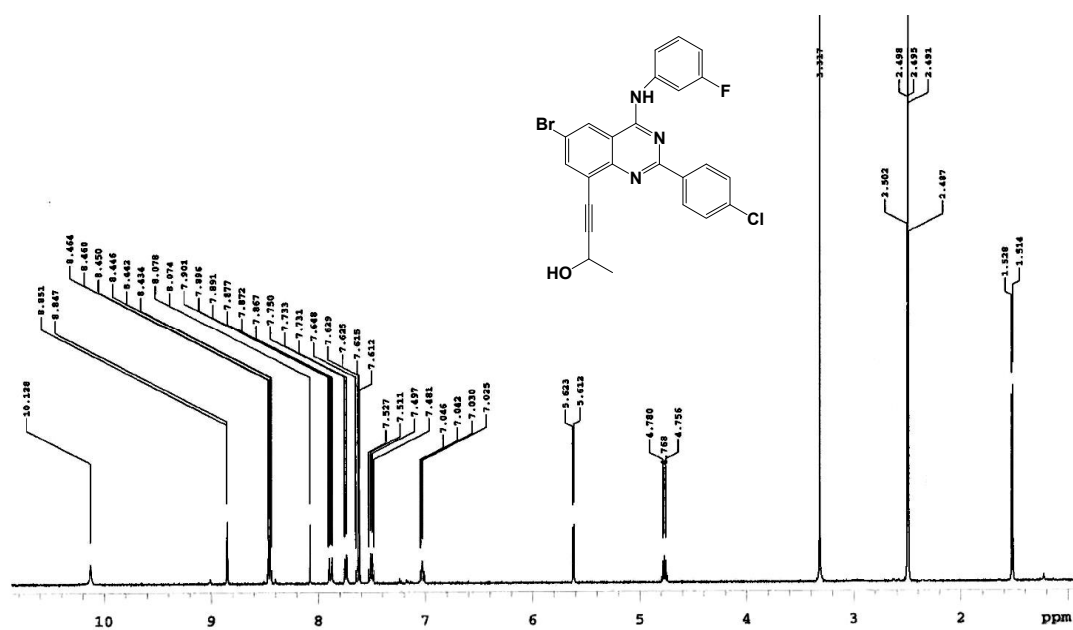Figure S17.  $^1\text{H}$  NMR Spectrum of Compound 4c.





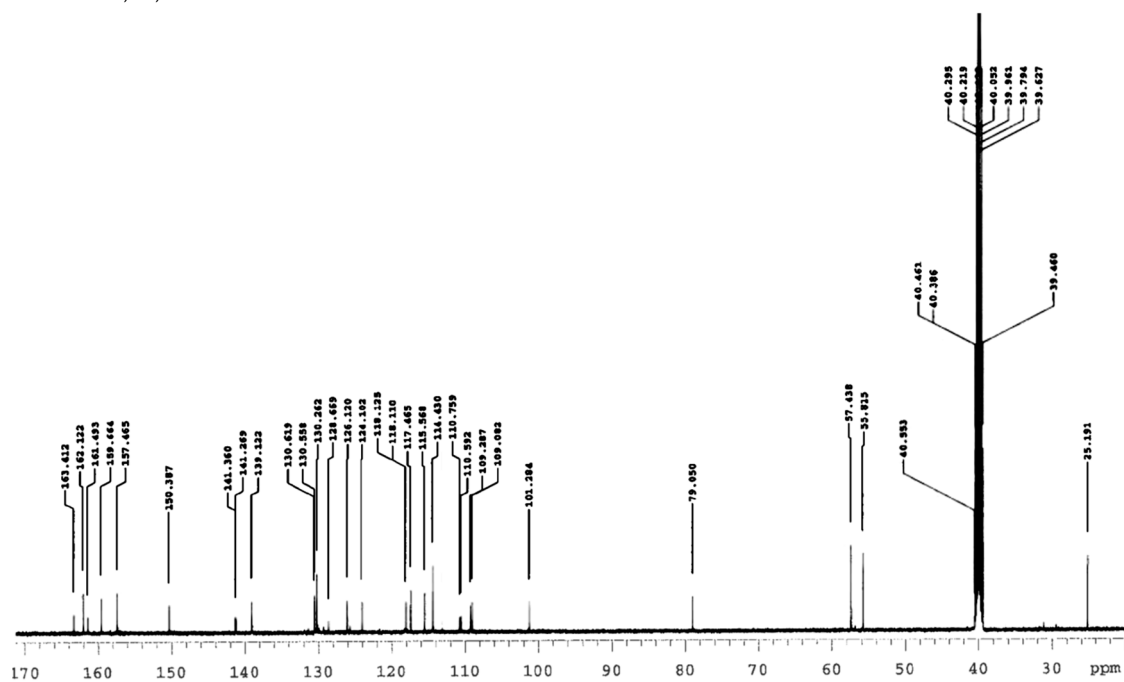Figure S20.  $^{13}\text{C}$  NMR Spectrum of Compound 4d.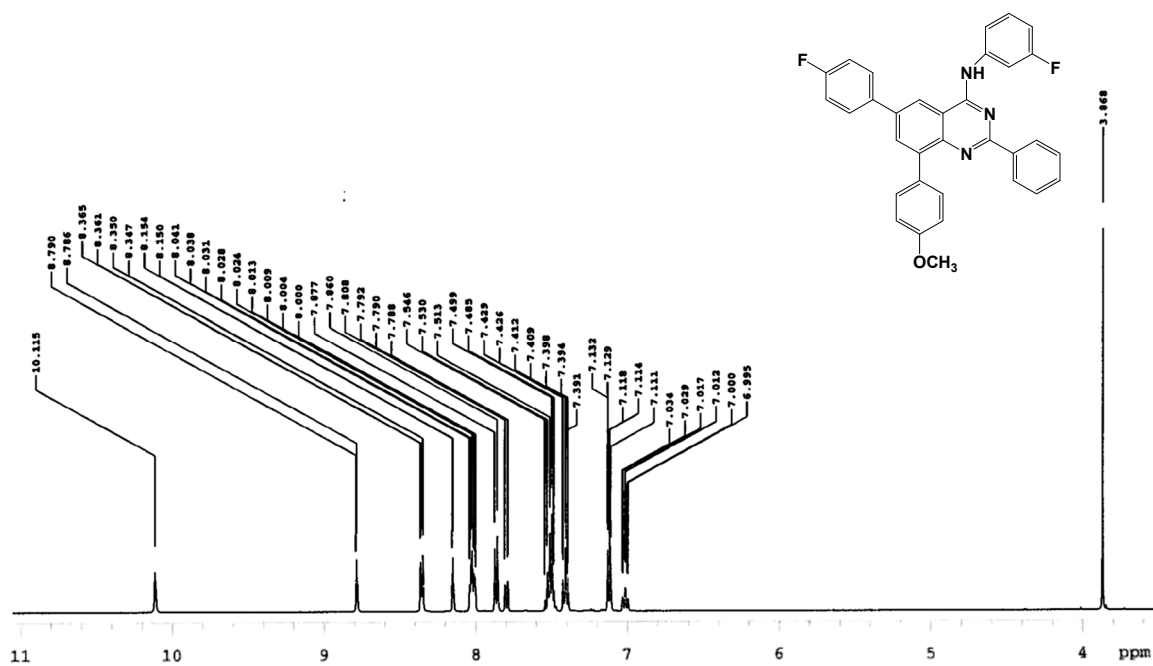Figure S21.  $^1\text{H}$  NMR Spectrum of Compound 5a.

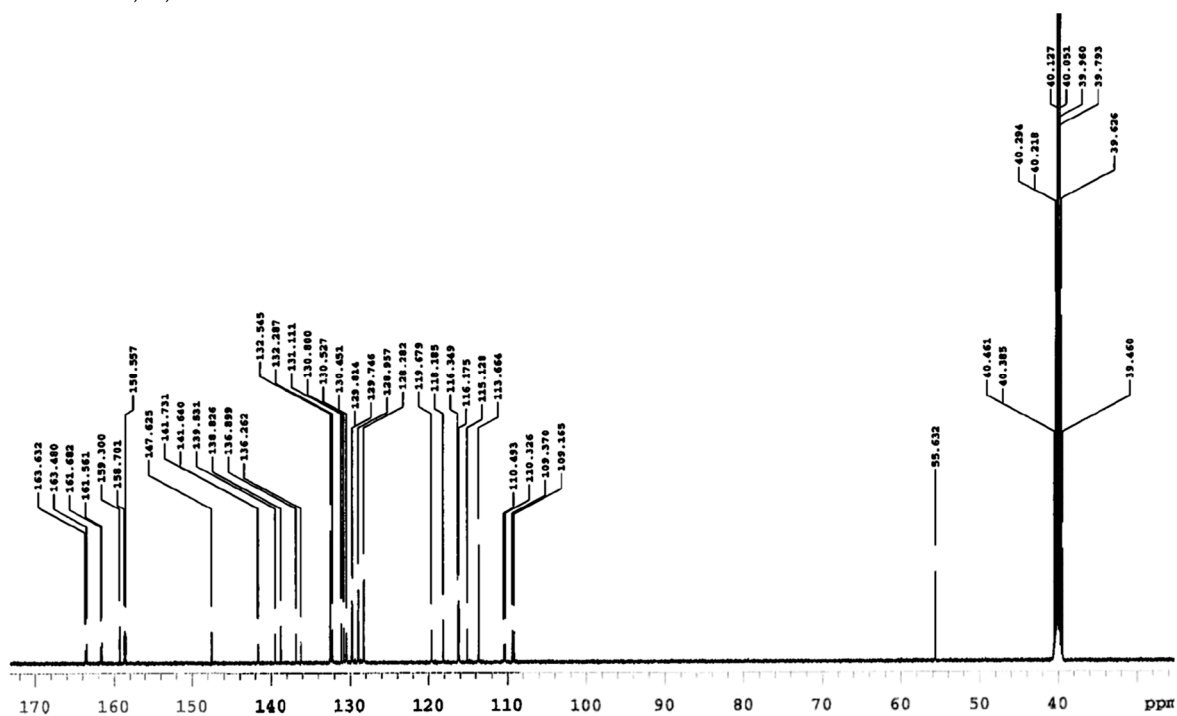Figure S22. <sup>13</sup>C NMR Spectrum of Compound 5a.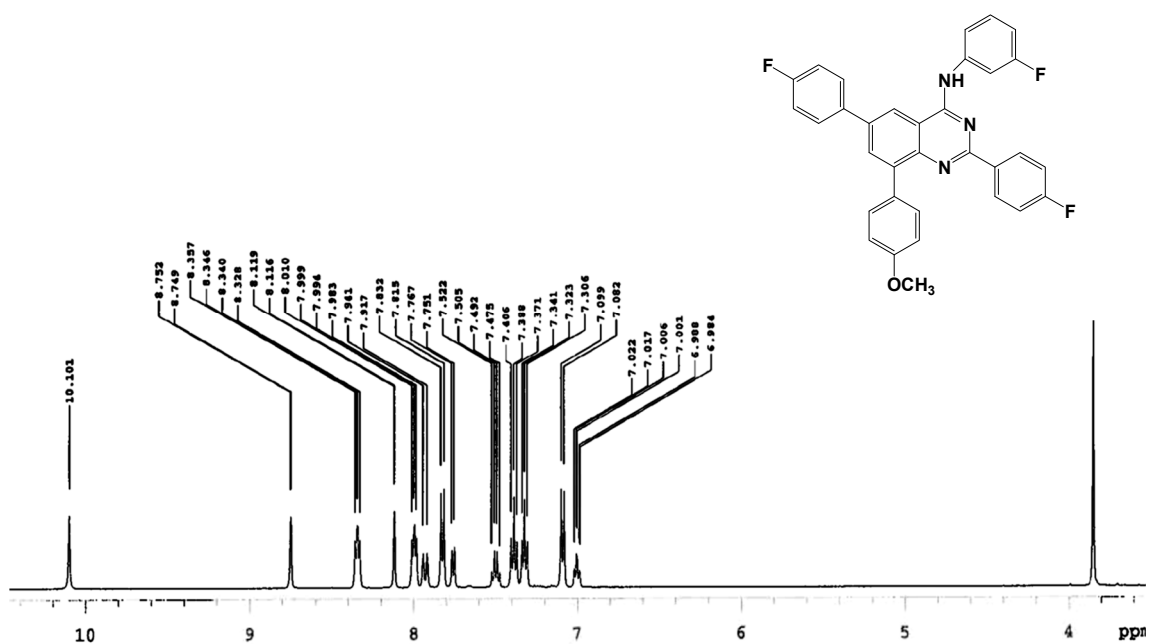Figure S23. <sup>1</sup>H NMR Spectrum of Compound 5b.

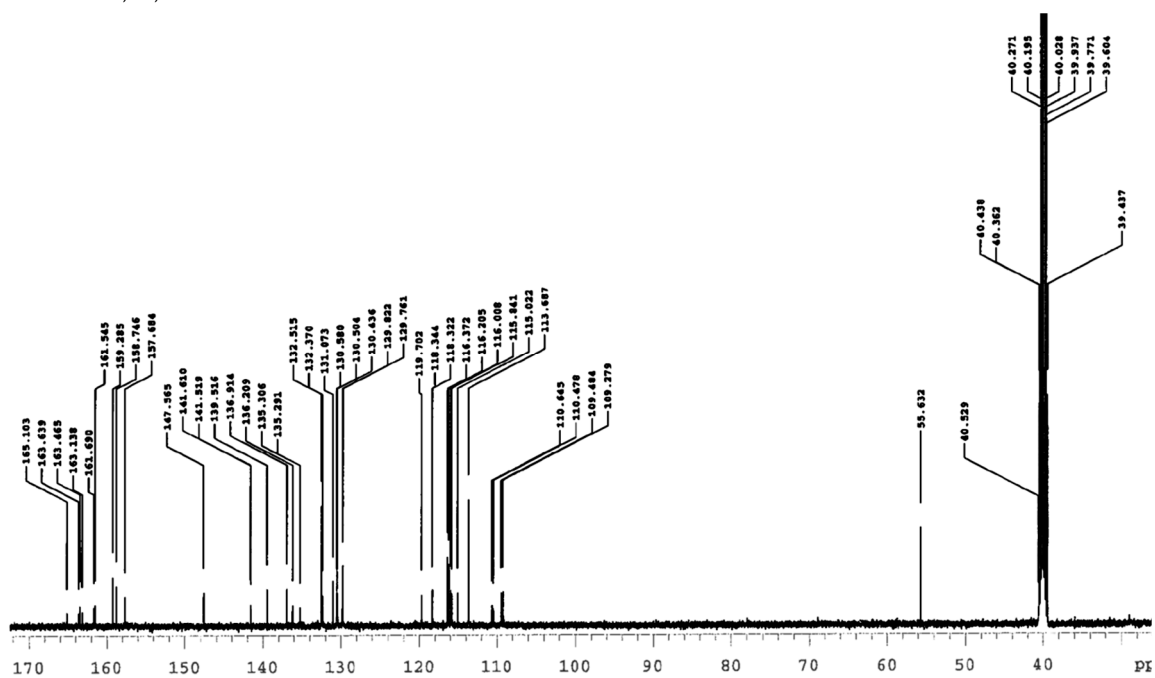Figure S24.  $^{13}\text{C}$  NMR Spectrum of Compound 5b.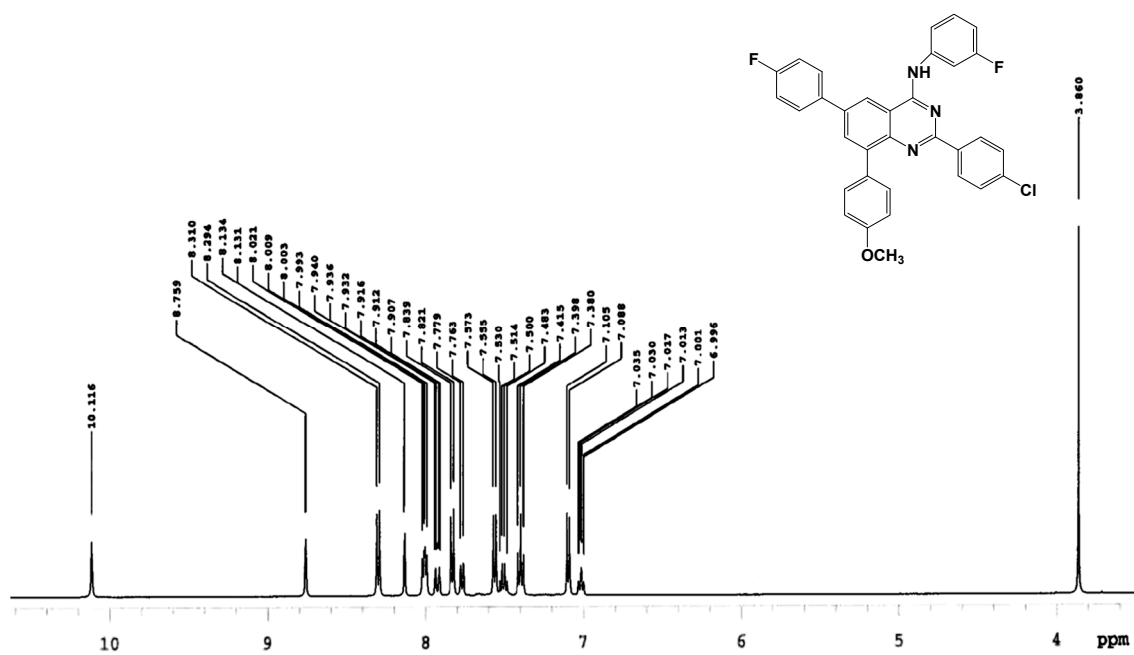Figure S25.  $^1\text{H}$  NMR Spectrum of Compound 5c.

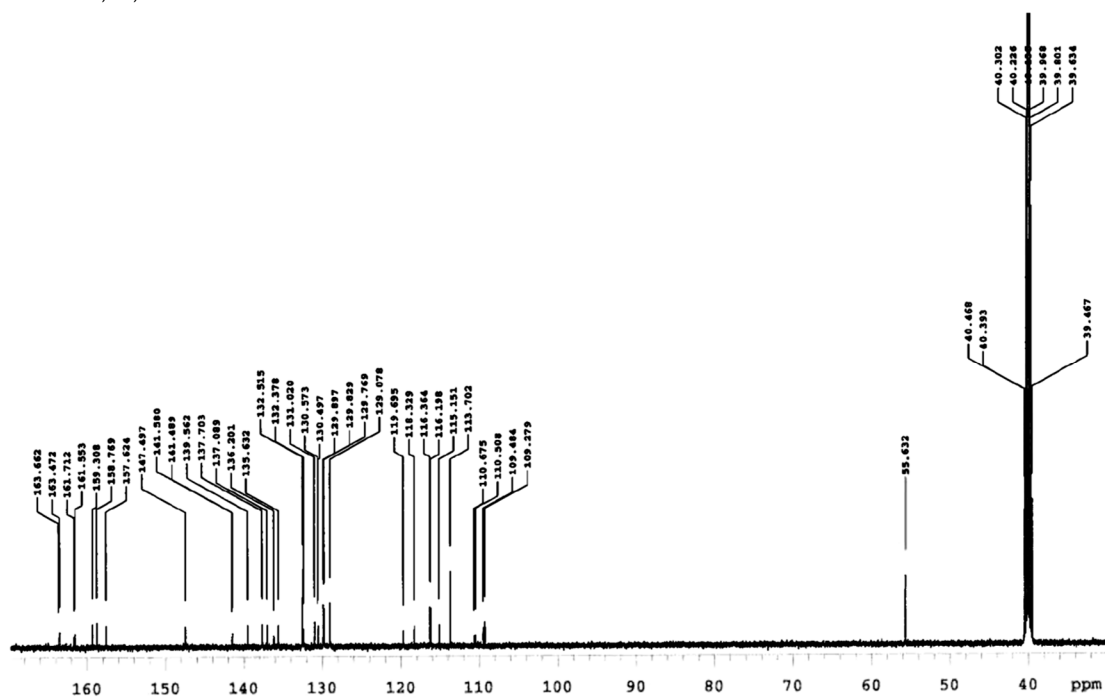Figure S26. <sup>13</sup>C NMR Spectrum of Compound 5c.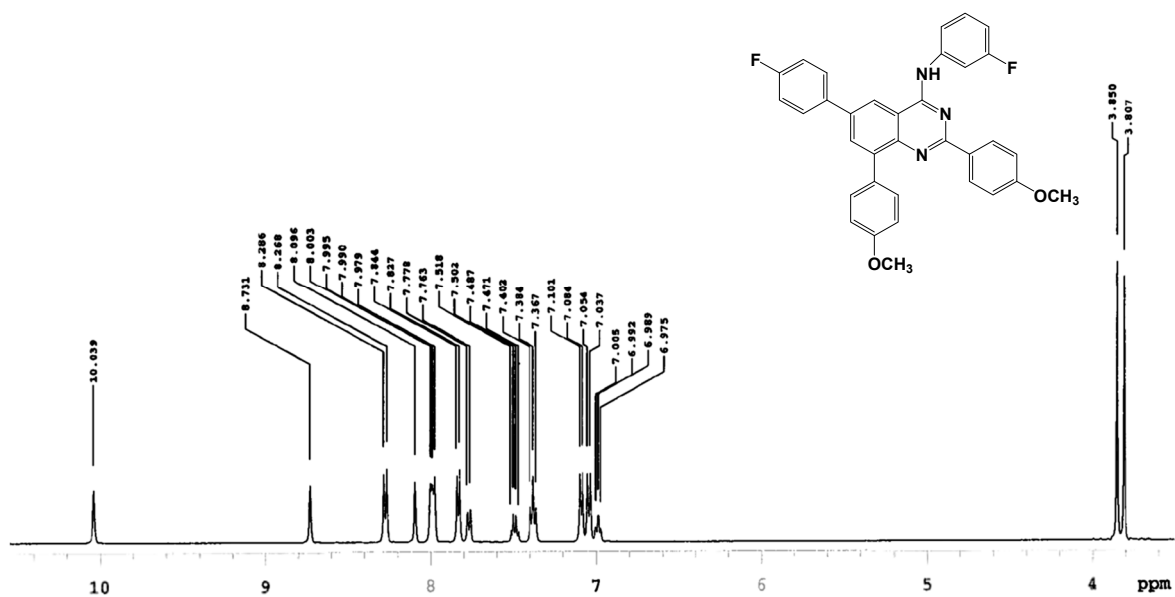Figure S27. <sup>1</sup>H NMR Spectrum of Compound 5d.

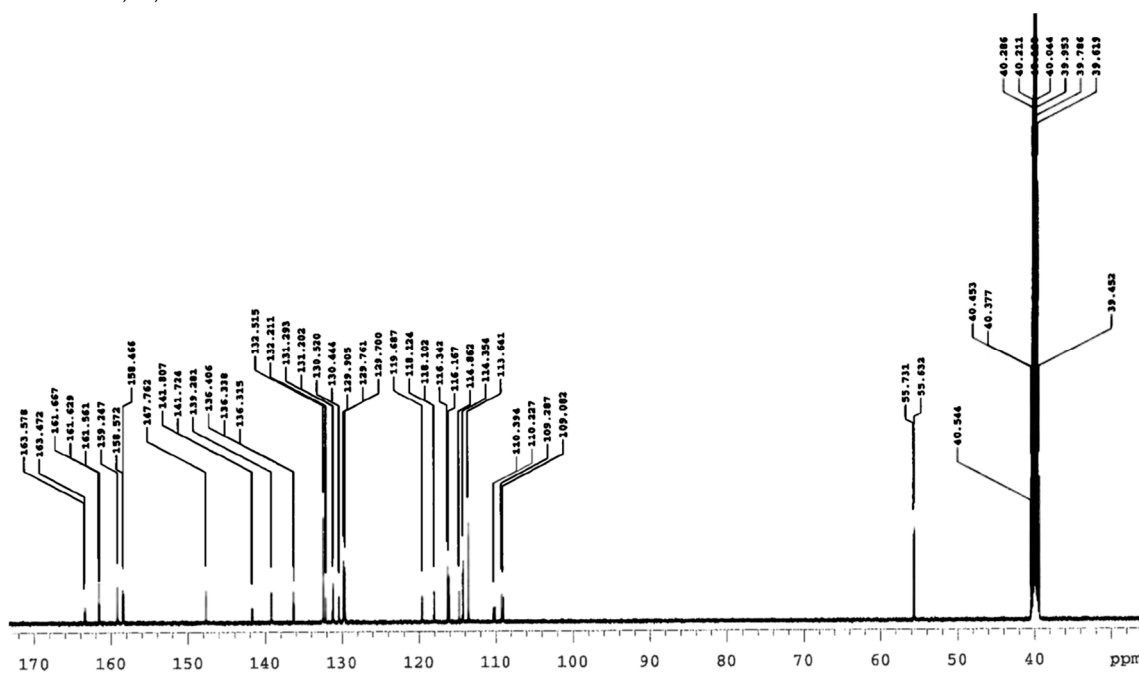Figure S28. <sup>13</sup>C NMR Spectrum of Compound 5d.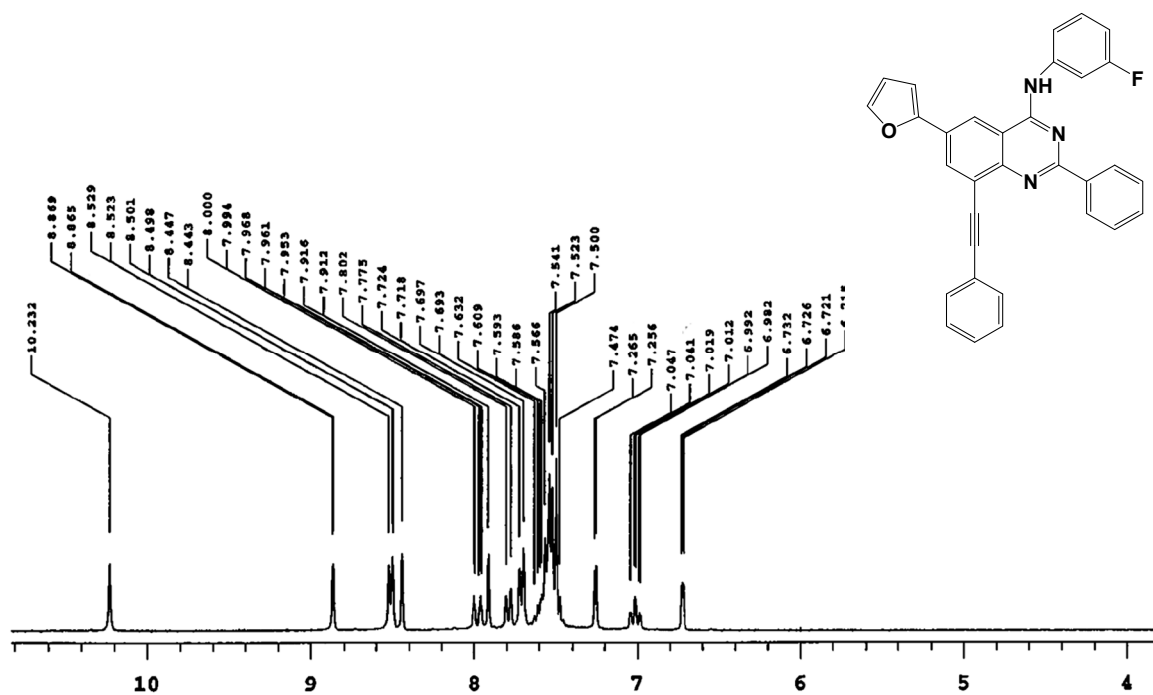Figure S29. <sup>1</sup>H NMR Spectrum of Compound 6a.

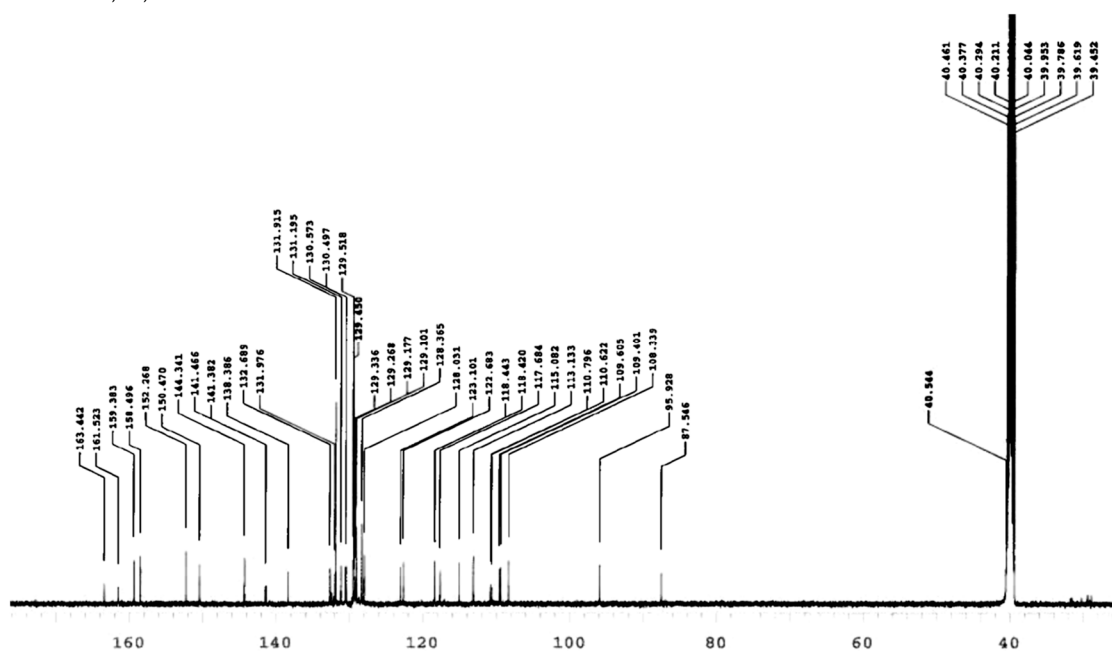Figure S30. <sup>13</sup>C NMR Spectrum of Compound 6a.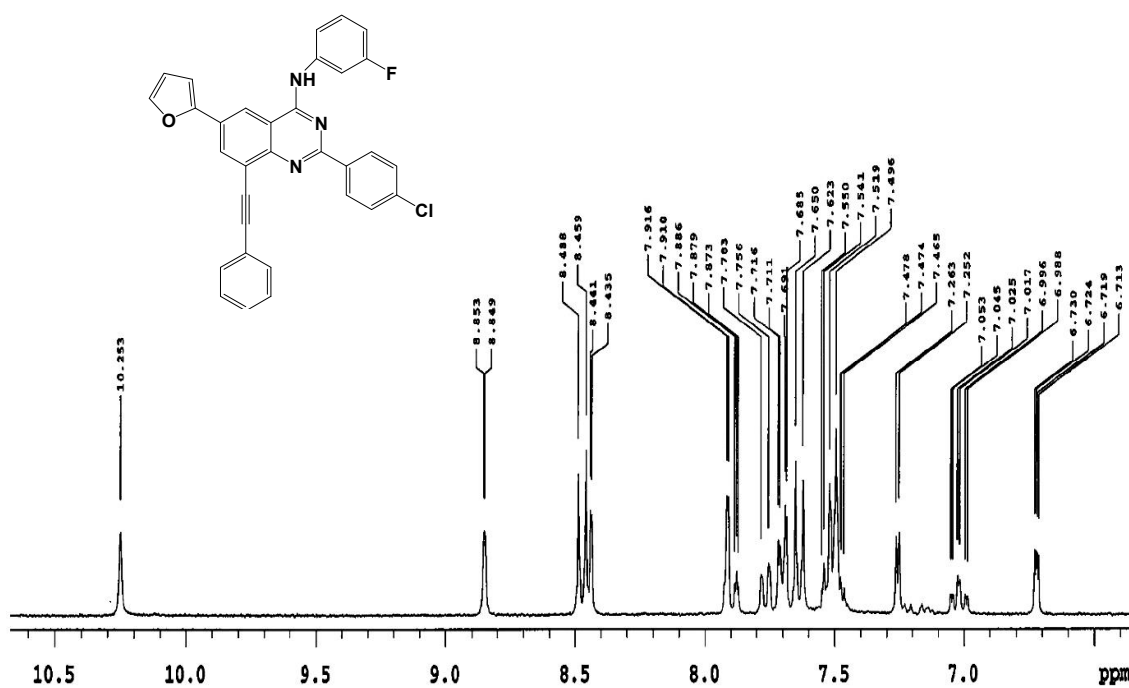Figure S31. <sup>1</sup>H NMR Spectrum of Compound 6c.

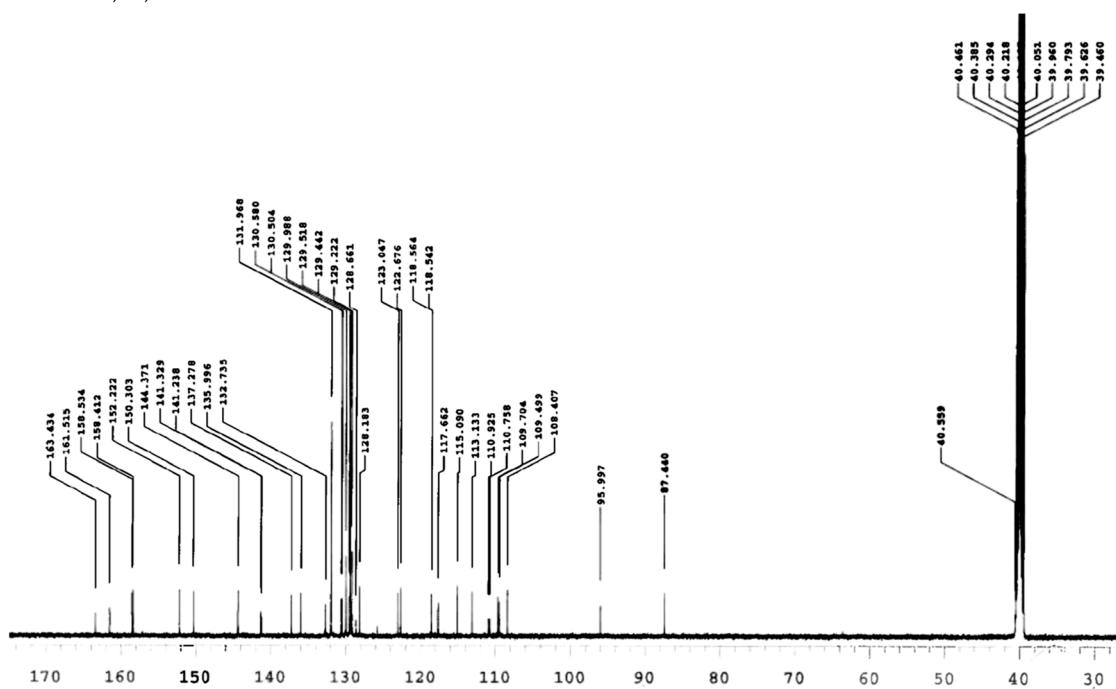Figure S32. <sup>13</sup>C NMR Spectrum of Compound 6c.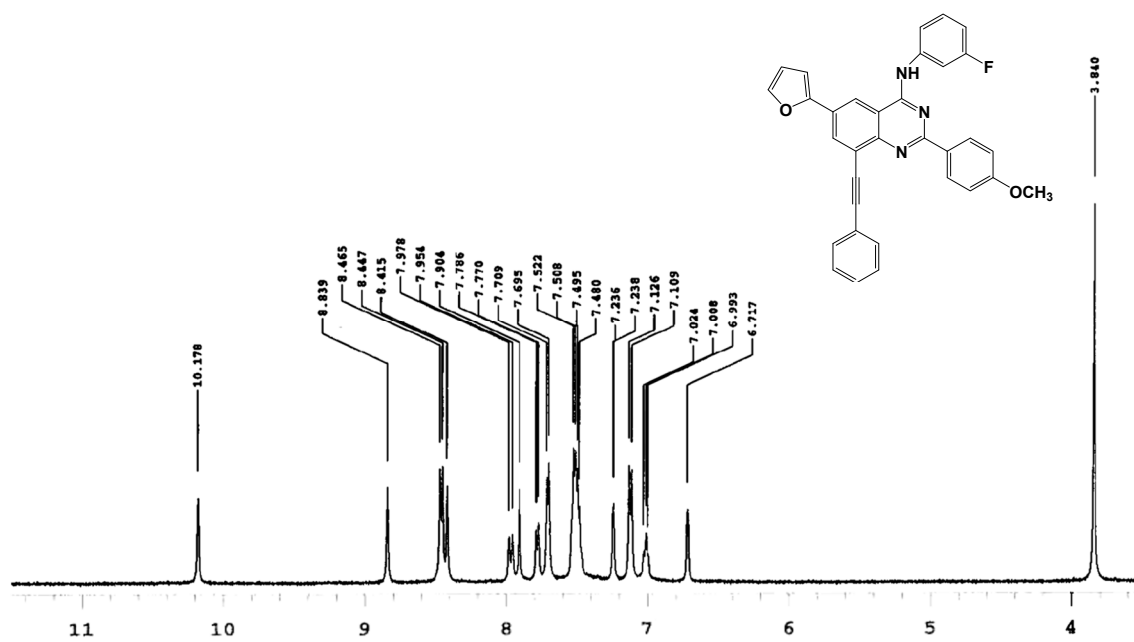Figure S33. <sup>1</sup>H NMR Spectrum of Compound 6d.

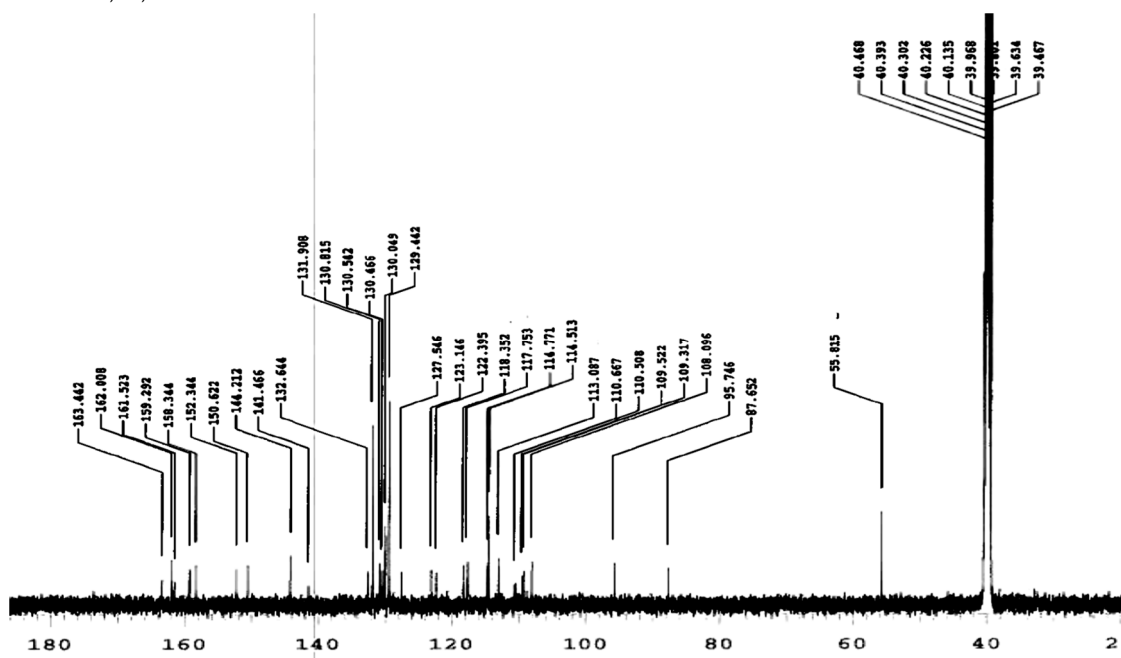Figure S34. <sup>13</sup>C NMR Spectrum of Compound 6d.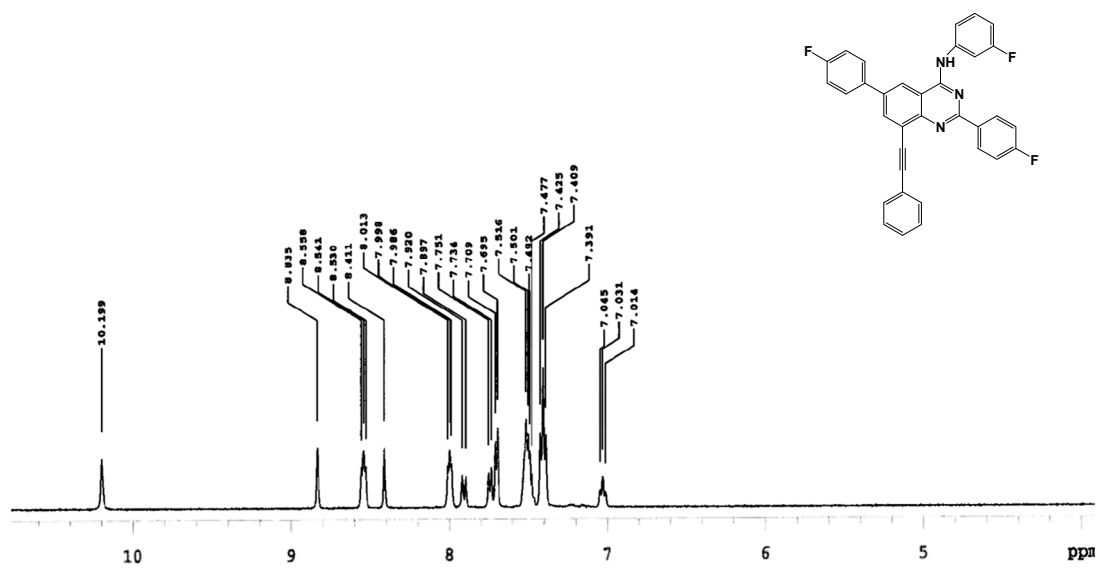Figure S35. <sup>1</sup>H NMR Spectrum of Compound 7a.



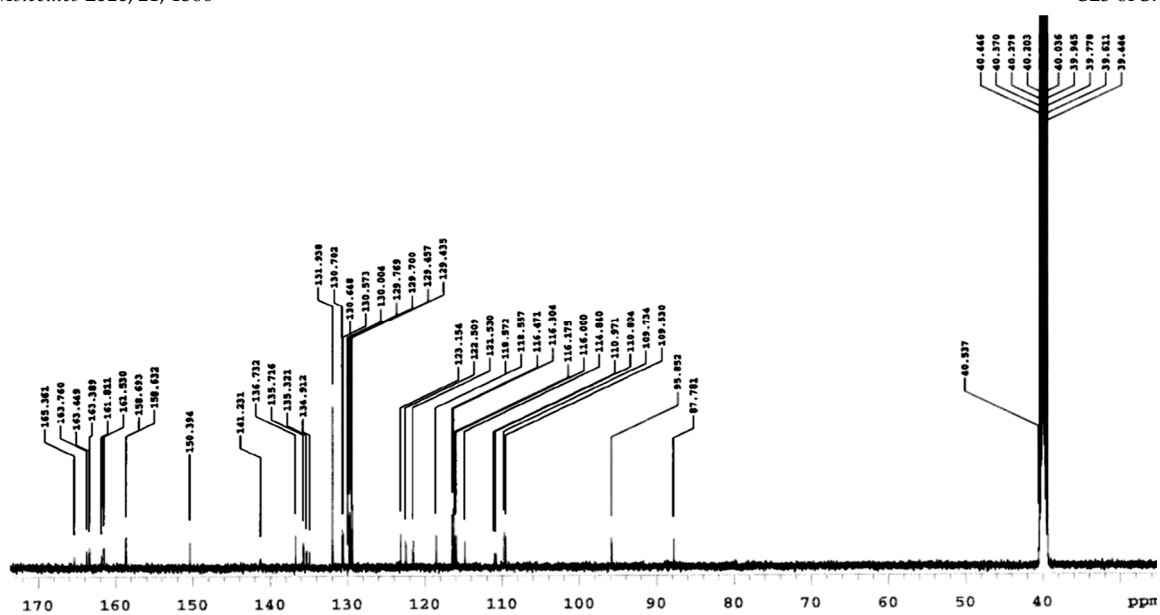Figure S36. <sup>13</sup>C NMR Spectrum of Compound 7a.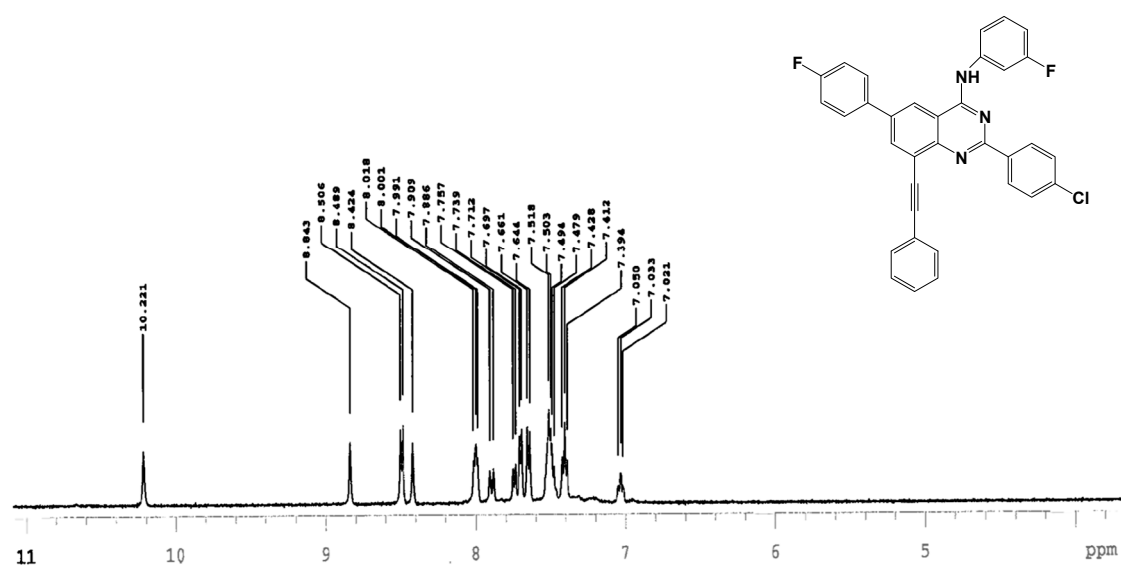Figure S37. <sup>1</sup>H NMR Spectrum of Compound 7b.

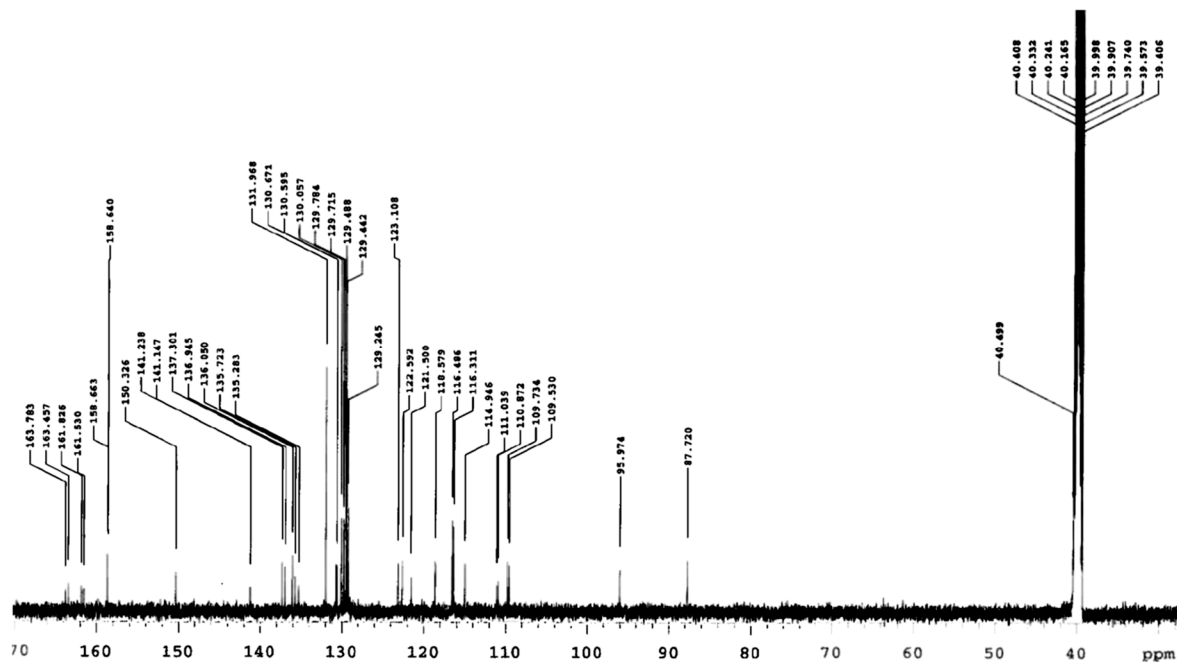Figure S38. <sup>13</sup>C NMR Spectrum of Compound 7b.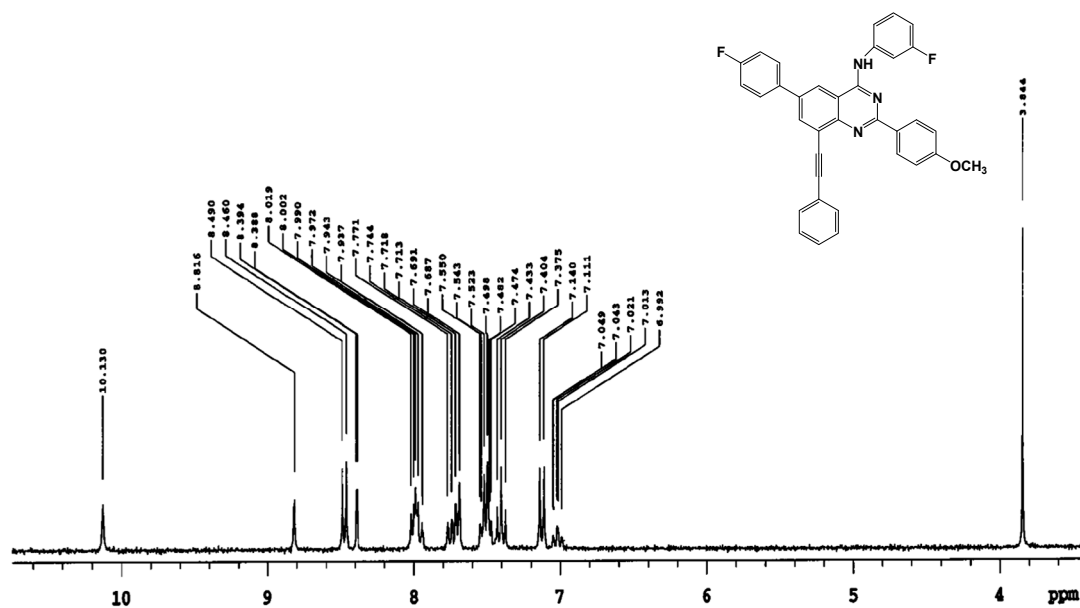Figure S39. <sup>1</sup>H NMR Spectrum of Compound 7c.

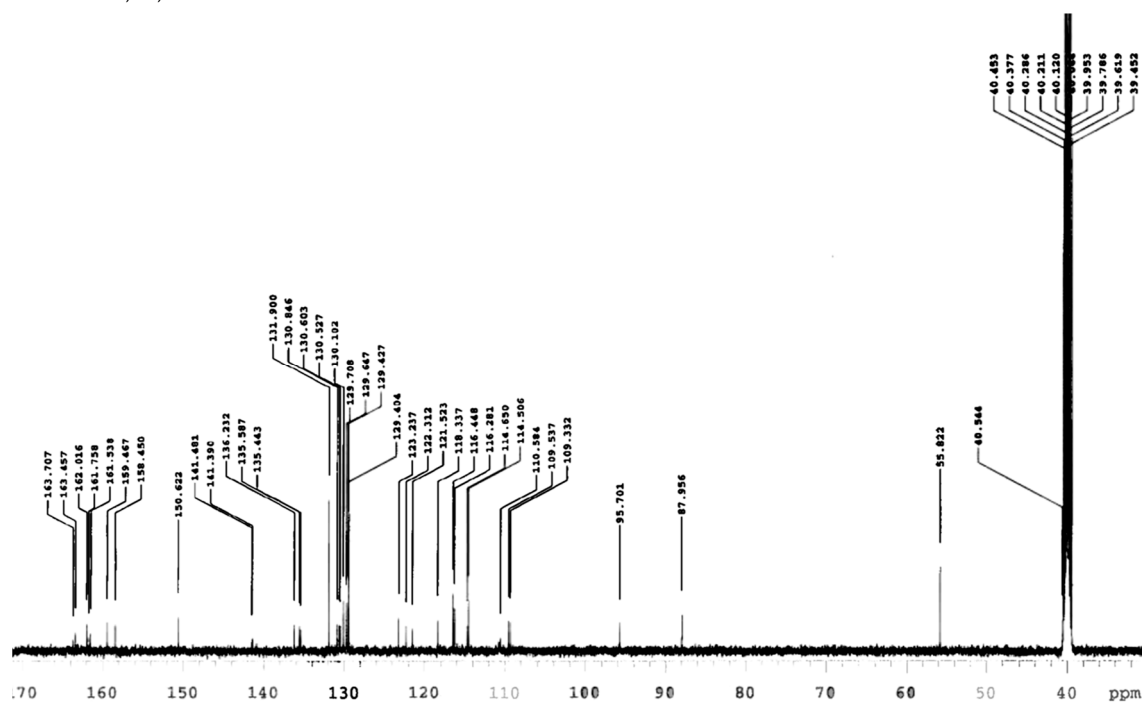Figure S40.  $^{13}\text{C}$  NMR Spectrum of Compounds 7.

3. % Cell Viability and LC<sub>50</sub> Values of Doxorubicin Hydrochloride and Compounds 2–7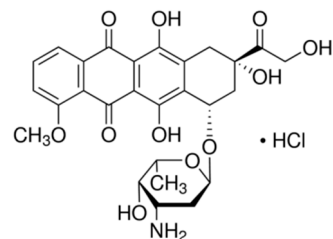

Figure S41. Chemical structure of Doxorubicin hydrochloride.

Table S1. Percentage cell viability of MCF-7, HeLa and A549 cells exposed to different concentrations of doxorubicin hydrochloride.

| Concentration ( $\mu\text{M}$ ) | Log Concentration | %Viability MCF-7 | SD   | %Viability HeLa | SD   | %Viability A549 | SD   |
|---------------------------------|-------------------|------------------|------|-----------------|------|-----------------|------|
| 20                              | 1.30103           | 27.68            | 1.09 | 5.59            | 0.71 | 36.24           | 1.29 |
| 10                              | 1                 | 32.10            | 1.06 | 8.77            | 0.10 | 41.89           | 0.94 |
| 5                               | 0.69897           | 34.25            | 1.64 | 16.83           | 0.20 | 45.91           | 0.68 |
| 2                               | 0.30103           | 35.55            | 1.25 | 47.65           | 1.10 | 50.88           | 1.25 |
| 1                               | 0                 | 57.5             | 1.57 | 55.64           | 0.73 | 59.29           | 1.21 |
| 0.5                             | -0.30103          | 70.47            | 1.74 | 67.36           | 1.90 | 68.95           | 1.76 |

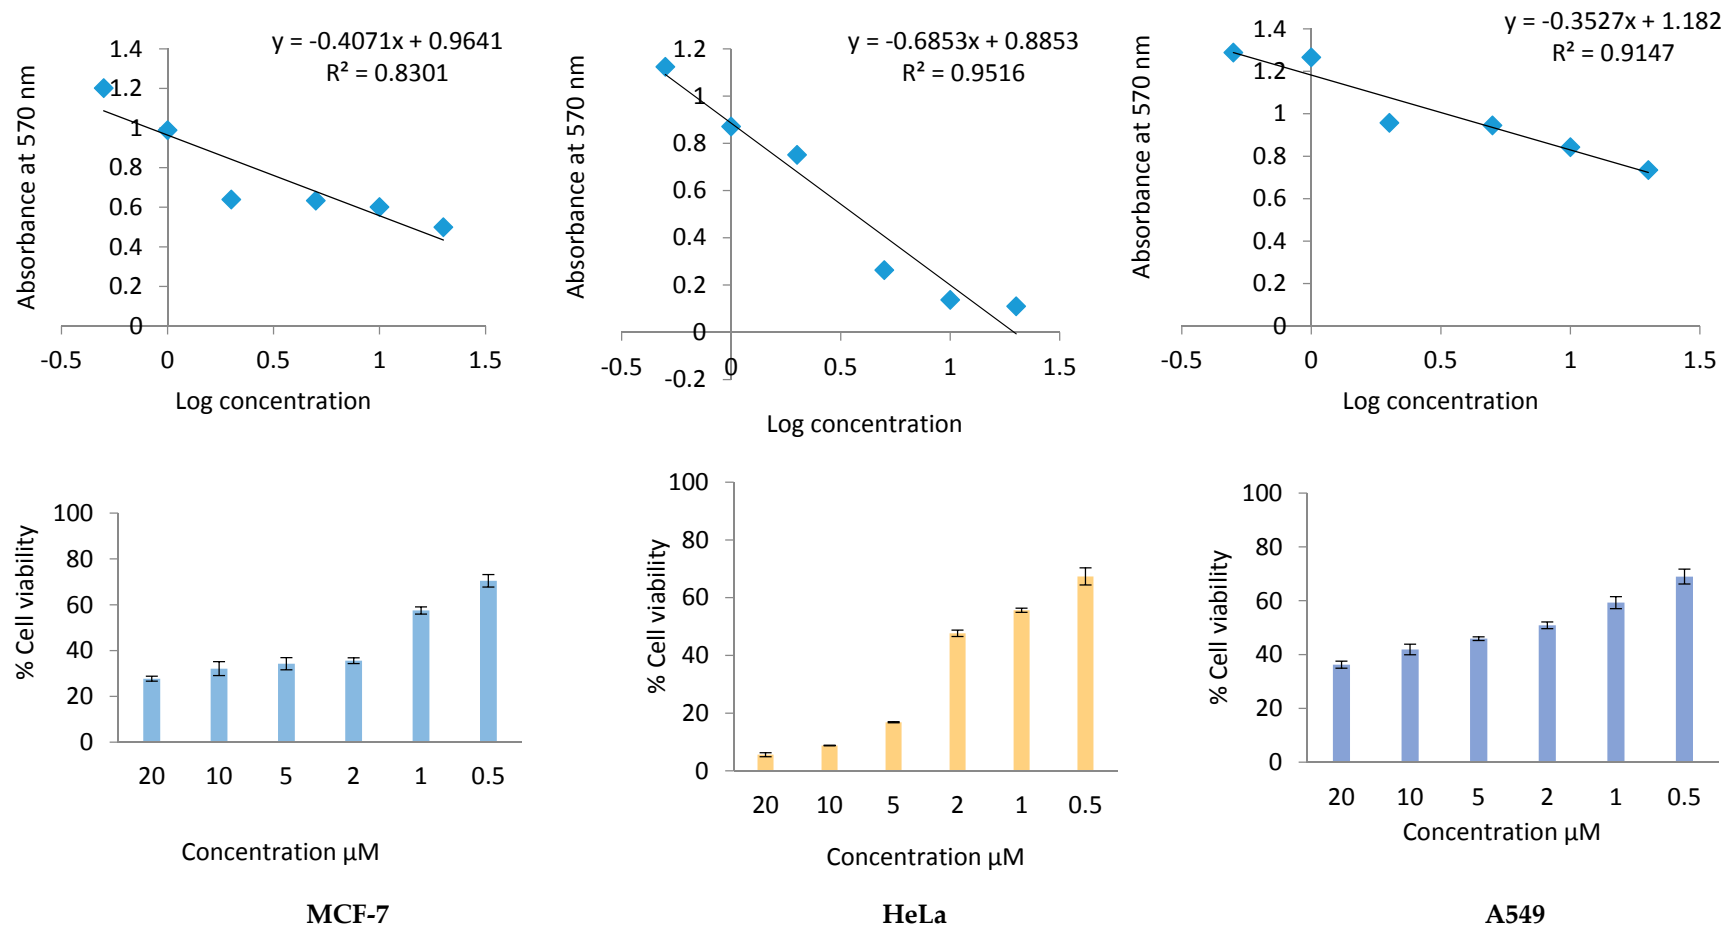

**Figure S42.** Linear regression plots and percentage cell viability graphs of MCF-7, HeLa and A549 cells exposed to different concentrations of doxorubicin hydrochloride.

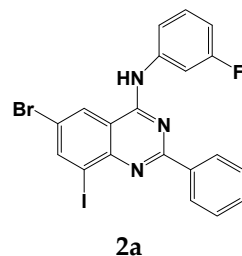

Figure S43. Chemical structure of 2a

Table S2. Percentage cell viability of MCF-7, HeLa and A549 cells exposed to different concentrations of 2a.

| Concentration ( $\mu\text{g/mL}$ ) | Log Concentration | %Viability MCF-7 | SD   | %Viability HeLa | SD   | %Viability A549 | SD   |
|------------------------------------|-------------------|------------------|------|-----------------|------|-----------------|------|
| 100                                | 2                 | 3.68             | 0.85 | 2.16            | 0.10 | 2.09            | 0.48 |
| 10                                 | 1                 | 65.01            | 2.93 | 71.90           | 1.73 | 67.16           | 1.39 |
| 1                                  | 0                 | 74.05            | 0.10 | 89.10           | 1.64 | 81.69           | 0.75 |
| 0.1                                | -1                | 91.20            | 2.08 | 96.52           | 1.27 | 89.91           | 2.40 |

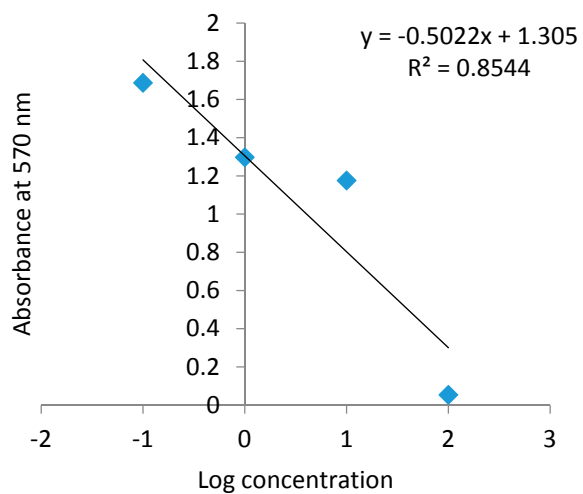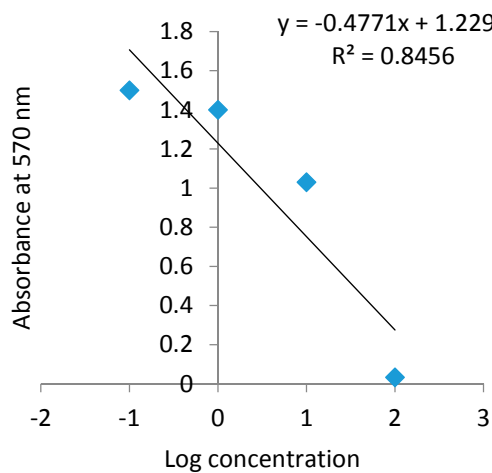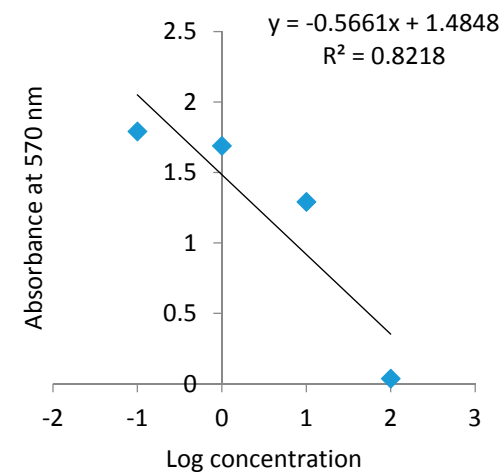

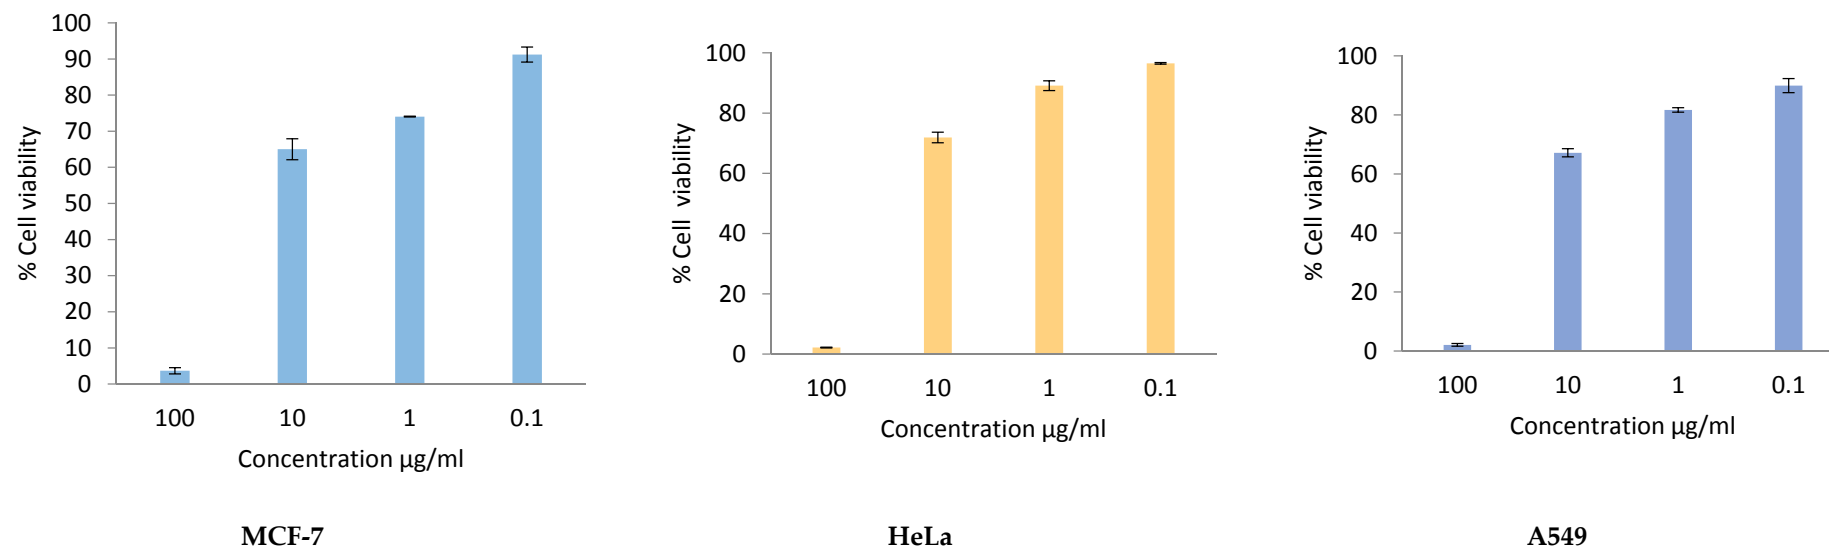

Figure S44. Linear regression plots and percentage cell viability graphs of MCF-7, HeLa and A549 cells exposed to different concentrations of 2a.

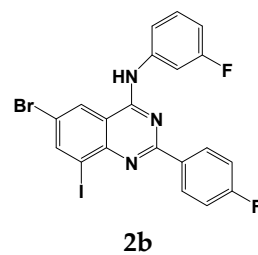

Figure S45. Chemical structure of 2b.

**Table S3.** Percentage cell viability of MCF-7, HeLa and A549 cells exposed to different concentrations of **2b**.

| Concentration ( $\mu\text{g/mL}$ ) | Log Concentration | %Viability MCF-7 | SD   | %Viability HeLa | SD   | %Viability A549 | SD   |
|------------------------------------|-------------------|------------------|------|-----------------|------|-----------------|------|
| 100                                | 2                 | 4.96             | 0.40 | 4.77            | 0.27 | 4.85            | 1.70 |
| 10                                 | 1                 | 45.47            | 2.38 | 62.38           | 1.87 | 66.36           | 1.39 |
| 1                                  | 0                 | 52.25            | 1.25 | 70.47           | 2.37 | 74.53           | 1.15 |
| 0.1                                | -1                | 73.55            | 0.61 | 76.85           | 1.46 | 79.10           | 2.00 |

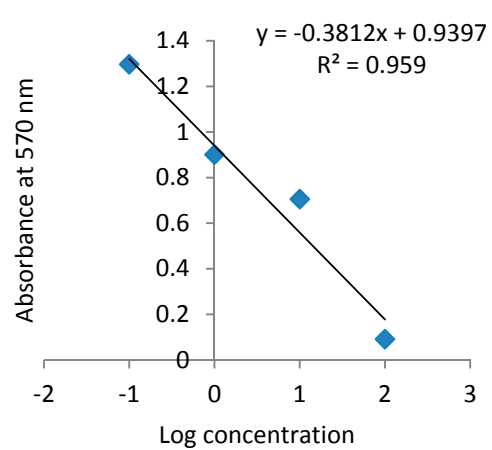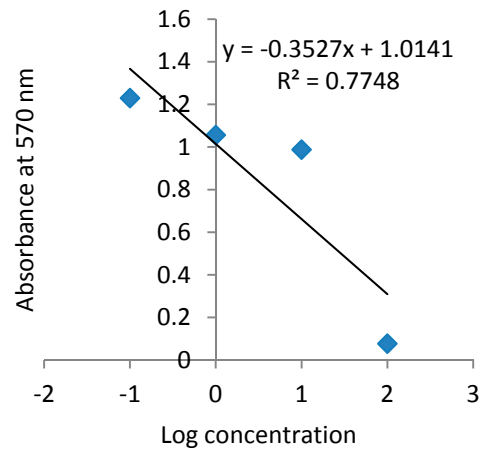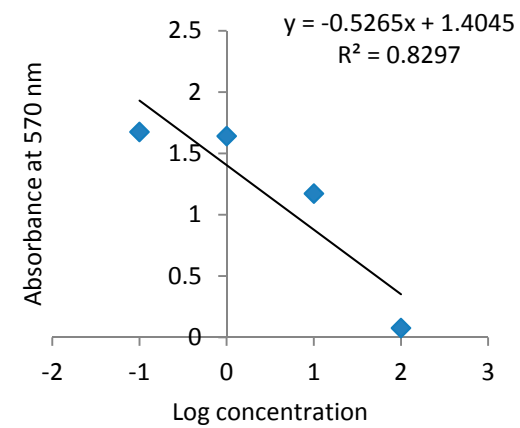



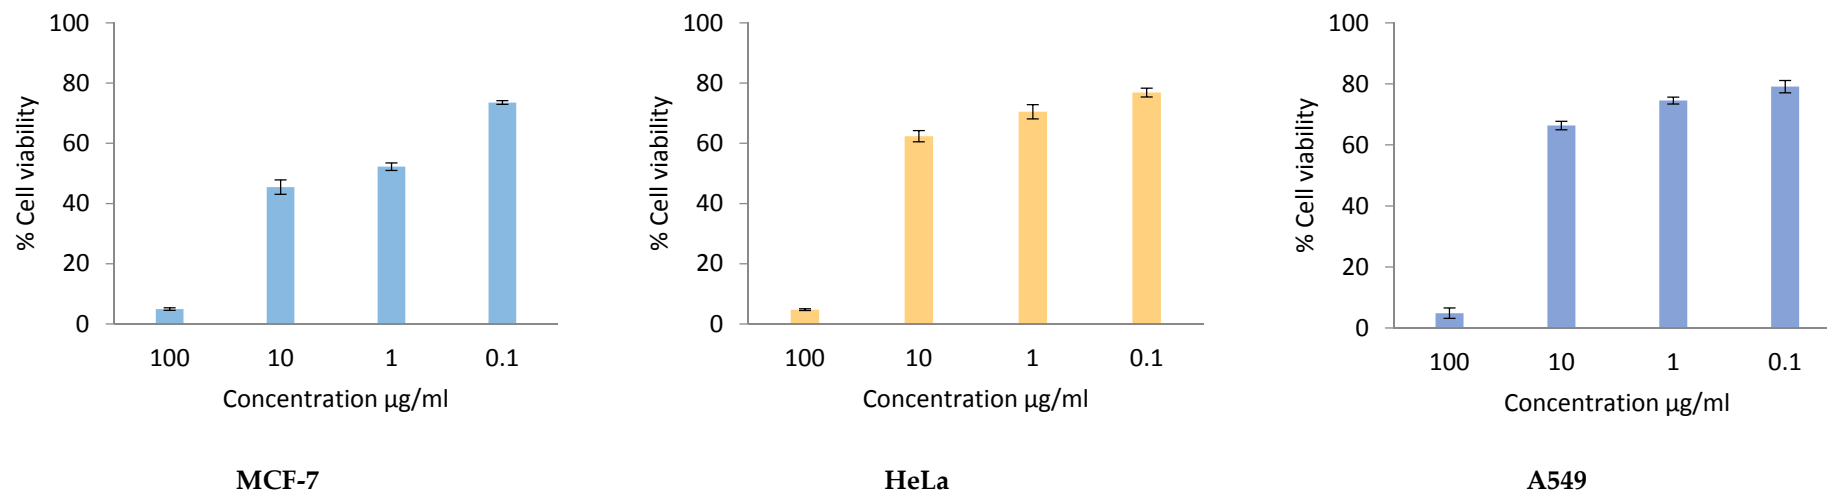

**Figure S46.** Linear regression plots and percentage cell viability graphs of MCF-7, HeLa and A549 cells exposed to different concentrations of **2b**.

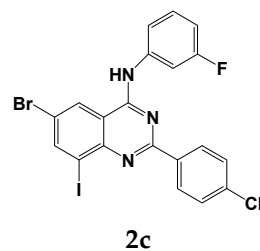

**Figure S47.** Chemical structure of **2c**.

**Table S4.** Percentage cell viability of MCF-7, HeLa and A549 cells exposed to different concentrations of **2c**.

| Concentration (µg/mL) | Log Concentration | %Viability MCF-7 | SD   | %Viability HeLa | SD   | %Viability A549 | SD   |
|-----------------------|-------------------|------------------|------|-----------------|------|-----------------|------|
| 100                   | 2                 | 8.54             | 3.24 | 11.25           | 0.73 | 10.17           | 1.41 |
| 10                    | 1                 | 42.66            | 1.01 | 54.58           | 0.87 | 63.99           | 0.74 |
| 1                     | 0                 | 50.78            | 2.92 | 79.11           | 0.93 | 71.21           | 1.72 |
| 0.1                   | -1                | 74.49            | 2.78 | 97.68           | 1.87 | 85.23           | 1.40 |

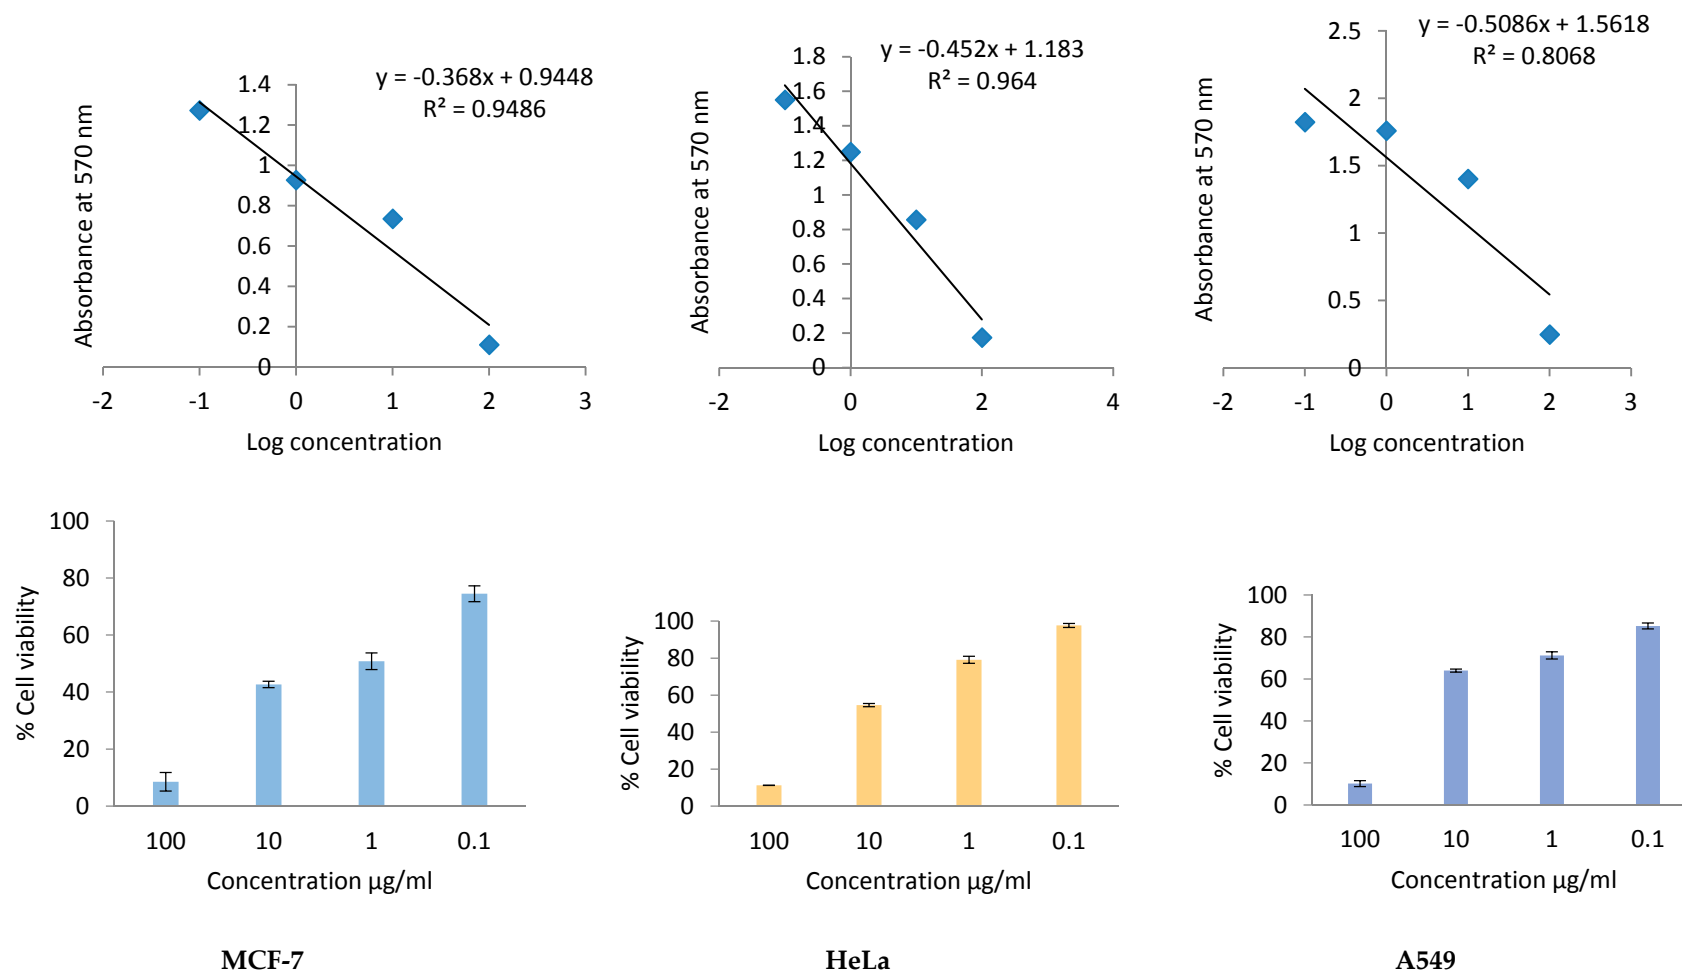

**Figure S48.** Linear regression plots and percentage cell viability graphs of MCF-7, HeLa and A549 cells exposed to different concentrations of 2c.

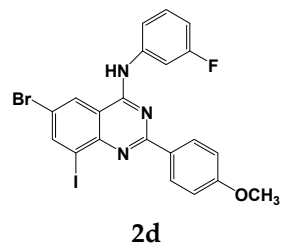

Figure S49. Chemical structure of 2d.

Table S5. Percentage cell viability of MCF-7, HeLa and A549 cells exposed to different concentrations of 2d.

| Concentration ( $\mu\text{g/mL}$ ) | Log Concentration | %Viability MCF-7 | SD   | %Viability HeLa | SD    | %Viability A549 | SD   |
|------------------------------------|-------------------|------------------|------|-----------------|-------|-----------------|------|
| 100                                | 2                 | 38.30            | 1.20 | 34.27           | 1.06  | 35.91           | 0.95 |
| 10                                 | 1                 | 79.28            | 2.05 | 49.61           | 1.611 | 73.76           | 1.23 |
| 1                                  | 0                 | 86.69            | 1.55 | 90.55           | 2.15  | 93.49           | 1.74 |
| 0.1                                | -1                | 91.38            | 0.42 | 95.13           | 2.47  | 96.95           | 0.61 |

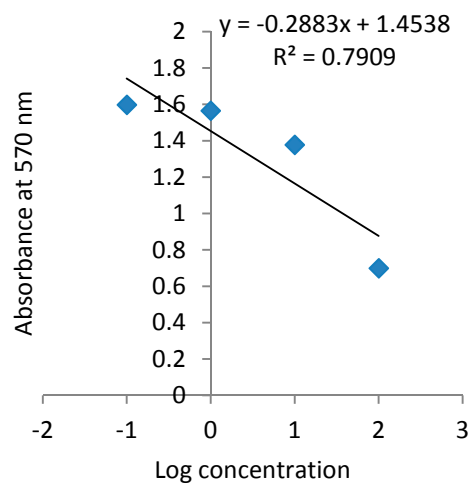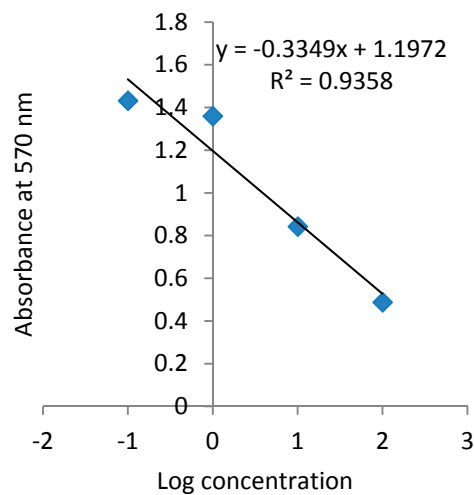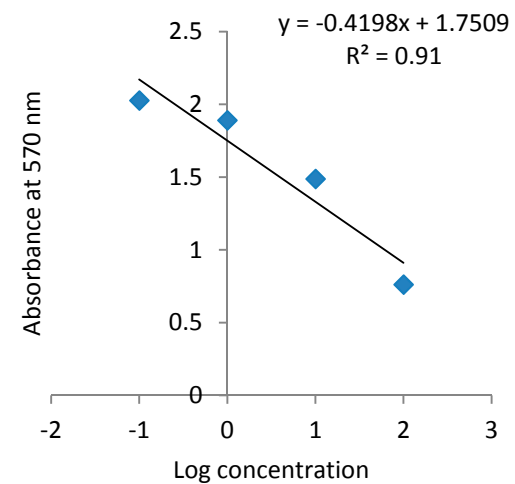

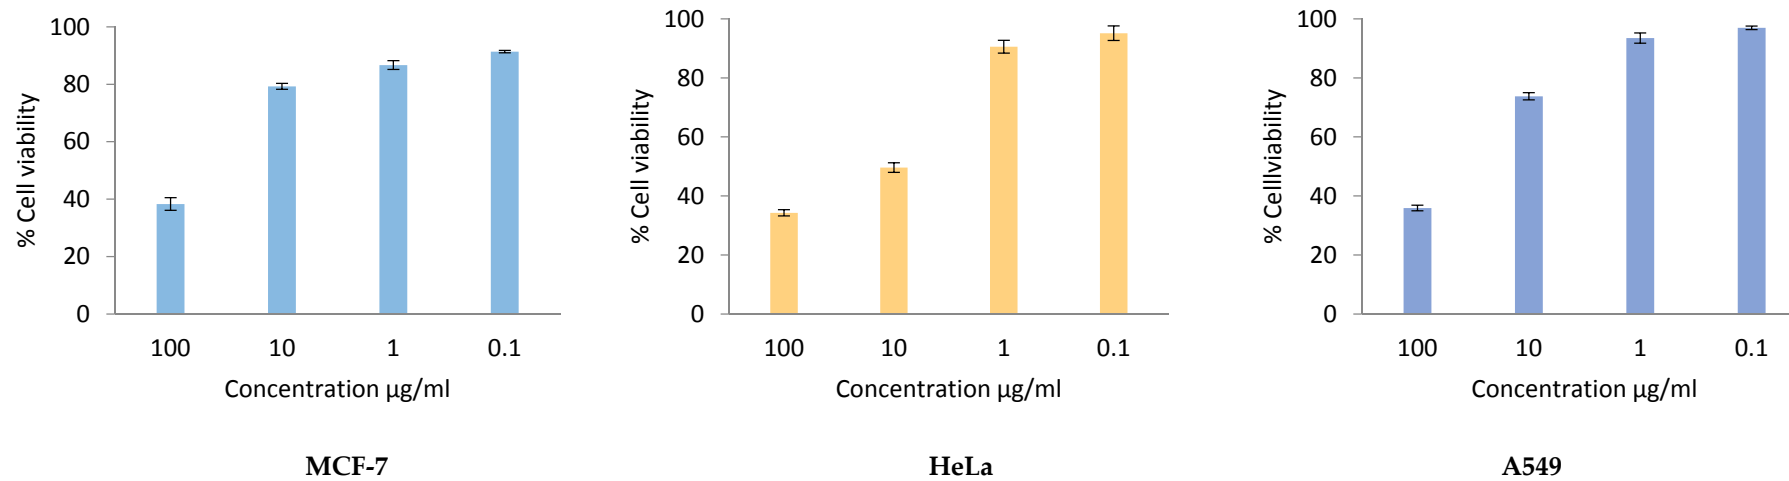

Figure S50. Linear regression plots and percentage cell viability graphs of MCF-7, HeLa and A549 cells exposed to different concentrations of 2d.

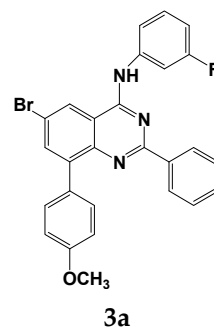

Figure S51. Chemical structure of 3a.

**Table S6.** Percentage cell viability of MCF-7, HeLa and A549 cells exposed to different concentrations of 3a.

| Concentration ( $\mu\text{g/mL}$ ) | Log Concentration | %Viability MCF-7 | SD   | %Viability HeLa | SD   | %Viability A549 | SD   |
|------------------------------------|-------------------|------------------|------|-----------------|------|-----------------|------|
| 100                                | 2                 | 54.50            | 0.64 | 61.28           | 1.15 | 54.00           | 1.55 |
| 10                                 | 1                 | 69.06            | 1.82 | 75.11           | 0.93 | 64.41           | 1.78 |
| 1                                  | 0                 | 77.24            | 1.67 | 93.49           | 1.56 | 96.38           | 0.34 |
| 0.1                                | -1                | 97.53            | 1.03 | 96.00           | 2.73 | 98.54           | 0.68 |

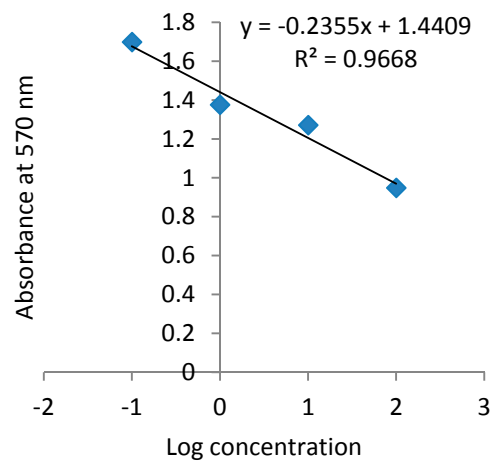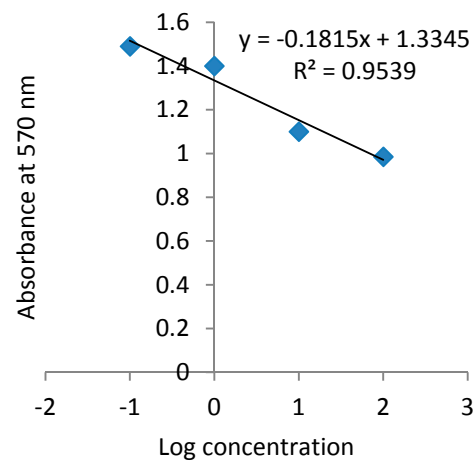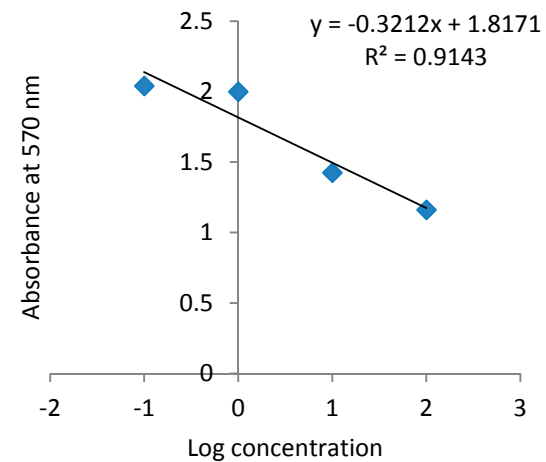

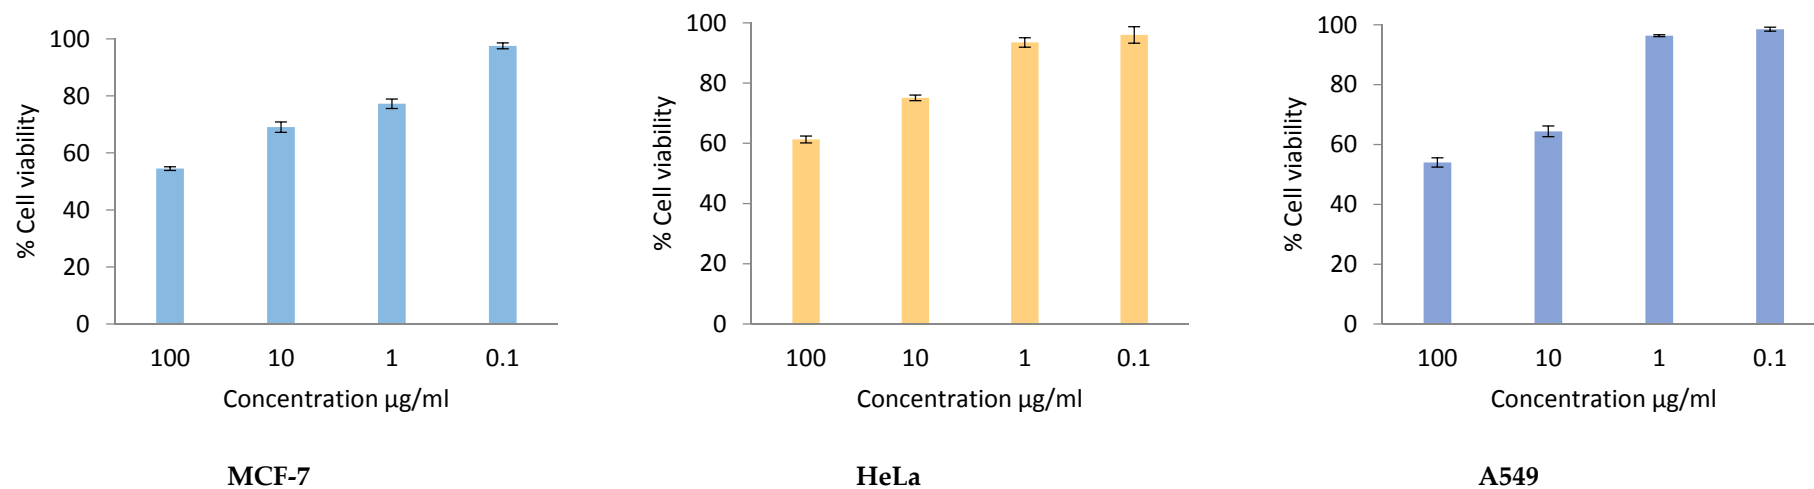

Figure S52. Linear regression plots and percentage cell viability graphs of MCF-7, HeLa and A549 cells exposed to different concentrations of 3a.

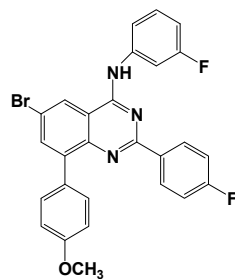

3b

Figure S53. Chemical structure of 3b.

**Table S7.** Percentage cell viability of MCF-7, HeLa and A549 cells exposed to different concentrations of **3b**.

| Concentration ( $\mu\text{g/mL}$ ) | Log Concentration | %Viability MCF-7 | SD   | %Viability HeLa | SD   | %Viability A549 | SD   |
|------------------------------------|-------------------|------------------|------|-----------------|------|-----------------|------|
| 100                                | 2                 | 47.75            | 2.31 | 43.39           | 0.64 | 38.09           | 1.57 |
| 10                                 | 1                 | 54.28            | 2.86 | 49.94           | 0.69 | 54.12           | 1.45 |
| 1                                  | 0                 | 60.46            | 2.28 | 62.38           | 1.51 | 57.10           | 0.20 |
| 0.1                                | -1                | 71.35            | 2.56 | 70.18           | 1.72 | 67.58           | 1.37 |

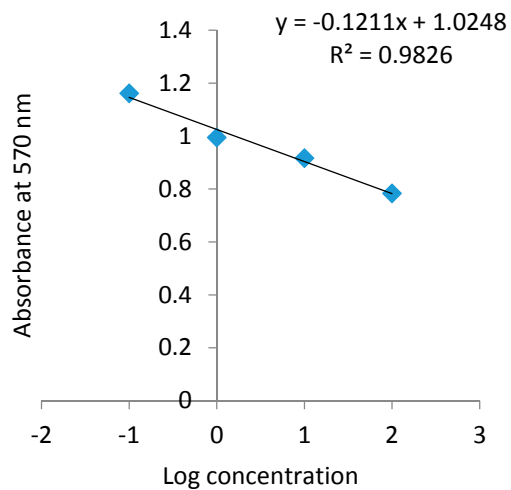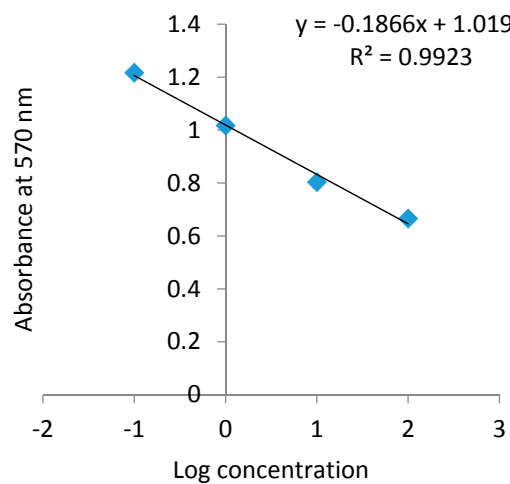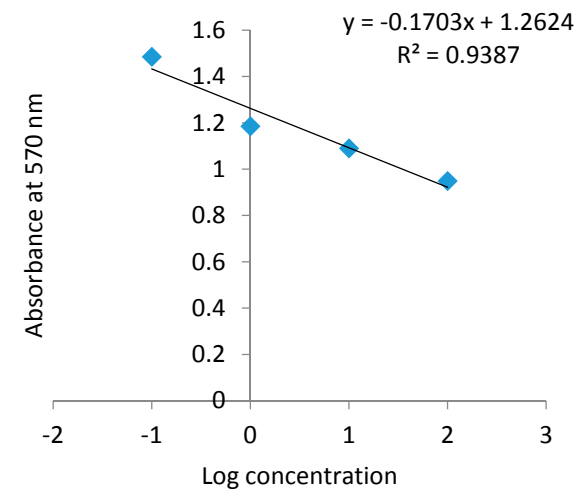

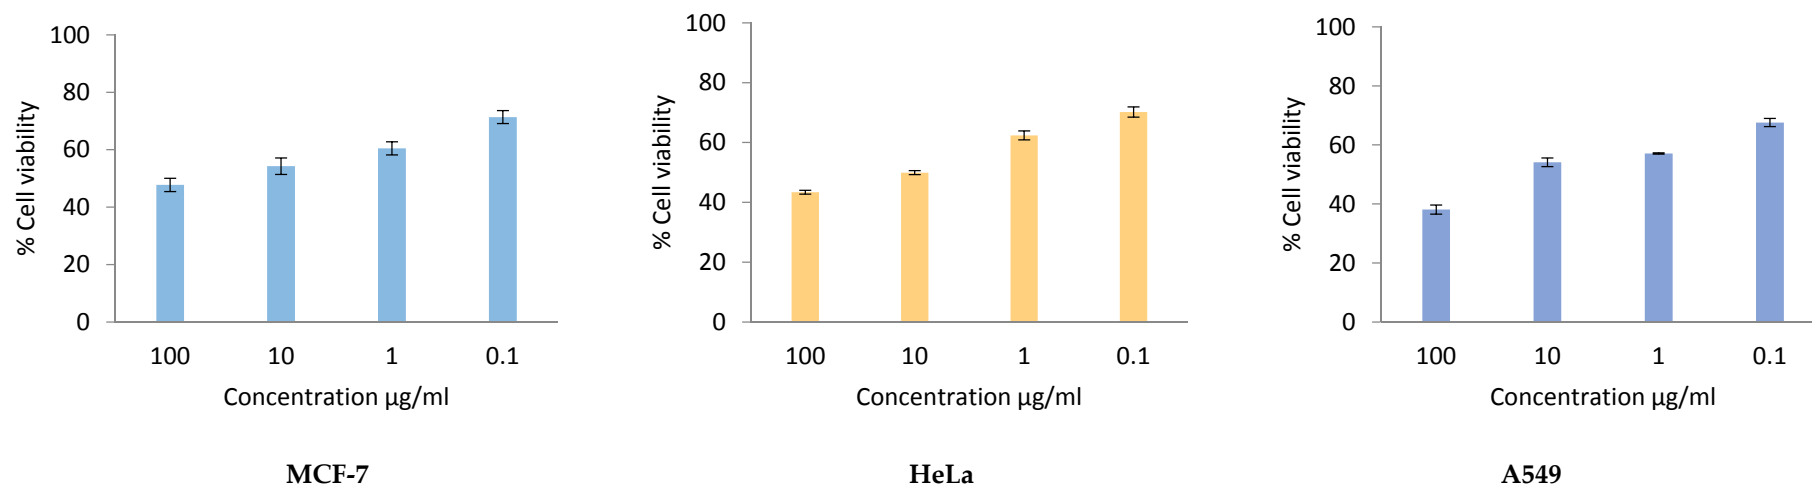

Figure S54. Linear regression plots and percentage cell viability graphs of MCF-7, HeLa and A549 cells exposed to different concentrations of 3b.

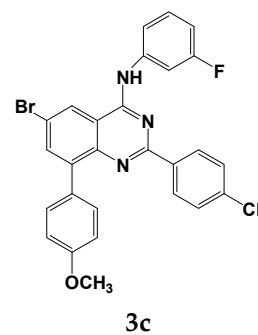

Figure S55. Chemical structure of 3c.



**Table S8.** Percentage cell viability of MCF-7, HeLa and A549 cells exposed to different concentrations of **3c**

| Concentration ( $\mu\text{g/mL}$ ) | Log Concentration | %Viability MCF-7 | SD   | %Viability HeLa | SD   | %Viability A549 | SD   |
|------------------------------------|-------------------|------------------|------|-----------------|------|-----------------|------|
| 100                                | 2                 | 42.10            | 2.60 | 34.69           | 0.73 | 42.71           | 1.45 |
| 10                                 | 1                 | 45.80            | 1.95 | 38.27           | 0.23 | 45.559          | 0.85 |
| 1                                  | 0                 | 55.33            | 1.81 | 39.49           | 0.68 | 62.71           | 1.29 |
| 0.1                                | -1                | 59.51            | 2.90 | 45.36           | 1.88 | 66.09           | 1.30 |

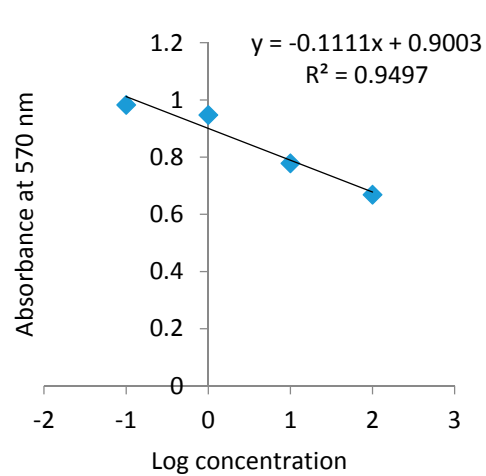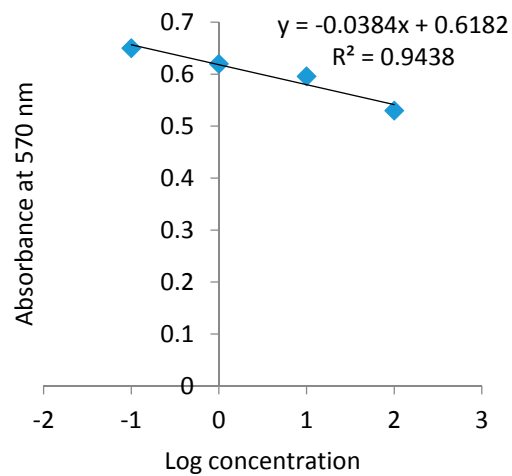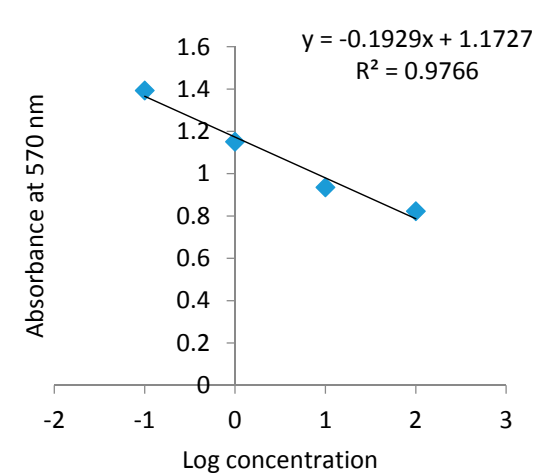

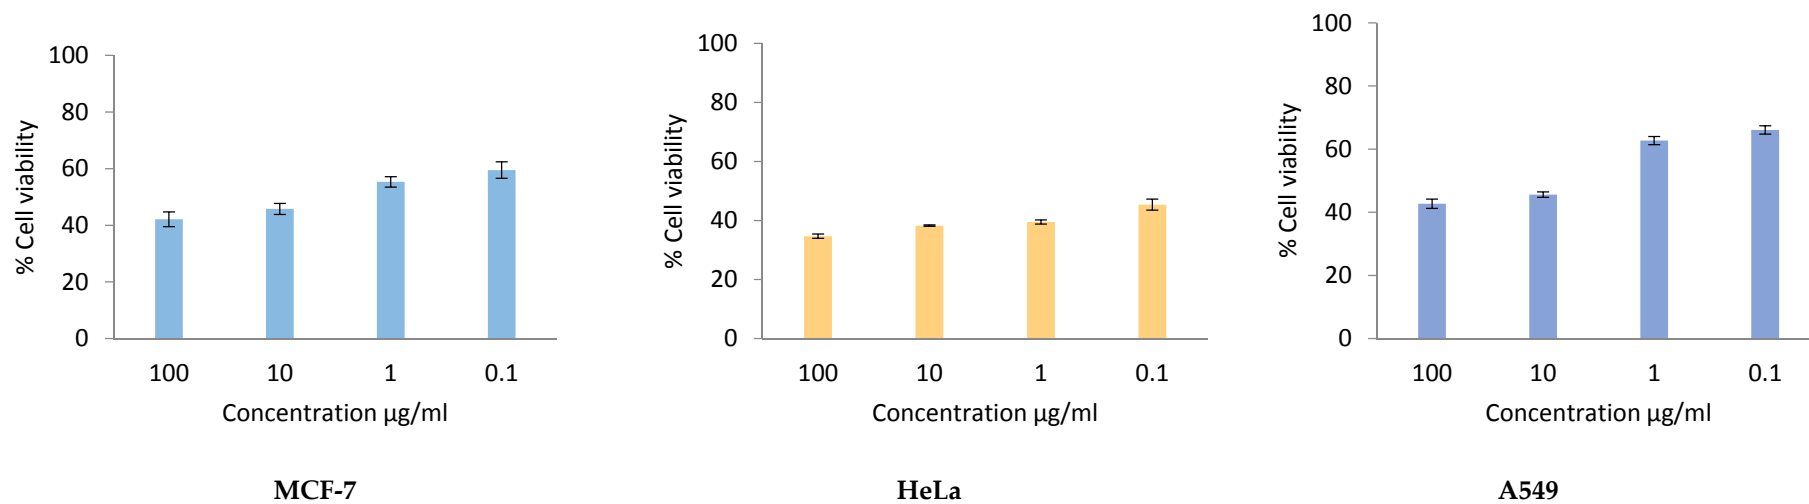

Figure S56. Linear regression plots and percentage cell viability graphs of MCF-7, HeLa and A549 cells exposed to different concentrations of 3c.

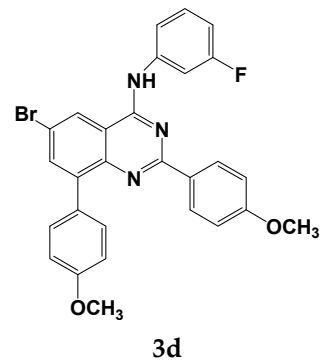

Figure S57. Chemical structure of 3d.

**Table S9.** Percentage cell viability of MCF-7, HeLa and A549 cells exposed to different concentrations of **3d**.

| Concentration ( $\mu\text{g/mL}$ ) | Log Concentration | %Viability MCF-7 | SD    | %Viability HeLa | SD   | %Viability A549 | SD   |
|------------------------------------|-------------------|------------------|-------|-----------------|------|-----------------|------|
| 100                                | 2                 | 45.88            | 2.044 | 45.94           | 0.96 | 67.68           | 0.68 |
| 10                                 | 1                 | 53.53            | 2.34  | 53.19           | 1.03 | 72.44           | 1.62 |
| 1                                  | 0                 | 55.33            | 1.84  | 55.16           | 0.32 | 73.98           | 1.45 |
| 0.1                                | -1                | 78.72            | 1.95  | 61.41           | 1.70 | 79.06           | 1.68 |

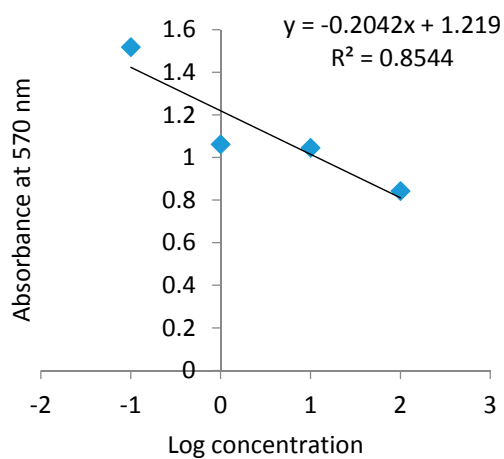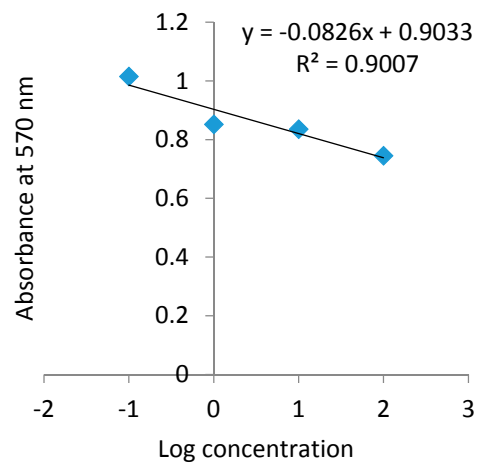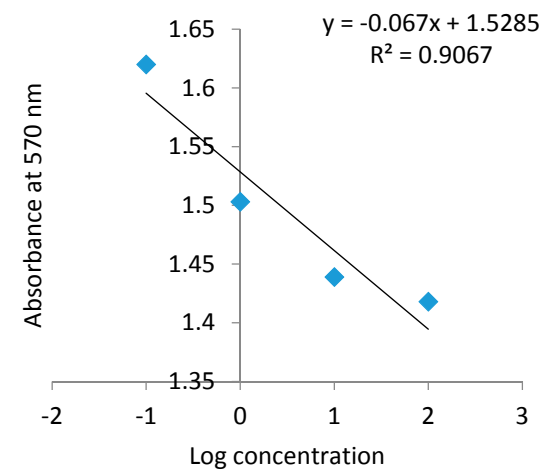

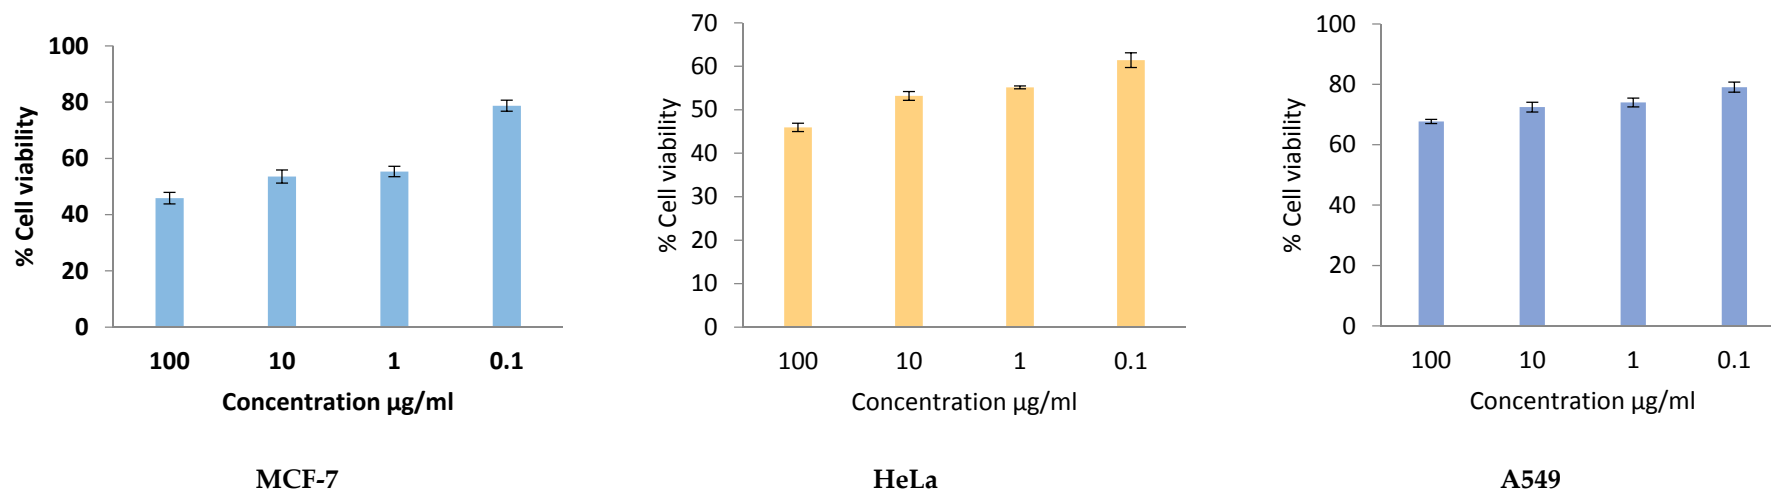

Figure S58. Linear regression plots and percentage cell viability graphs of MCF-7, HeLa and A549 cells exposed to different concentrations of 3d.

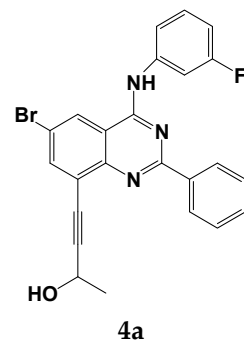

Figure S59. Chemical structure of 4a.

**Table S10.** Percentage cell viability of MCF-7, HeLa and A549 cells exposed to different concentrations of **4a**.

| Concentration ( $\mu\text{g/mL}$ ) | Log Concentration | %Viability MCF-7 | SD   | %Viability HeLa | SD   | %Viability A549 | SD   |
|------------------------------------|-------------------|------------------|------|-----------------|------|-----------------|------|
| 100                                | 2                 | 9.85             | 1.63 | 14.64           | 0.10 | 11.15           | 156  |
| 10                                 | 1                 | 67.39            | 1.53 | 56.42           | 1.19 | 55.49           | 0.71 |
| 1                                  | 0                 | 78.34            | 1.78 | 57.93           | 1.14 | 76.19           | 1.70 |
| 0.1                                | -1                | 95.36            | 2.16 | 68.28           | 1.47 | 78.39           | 1.59 |

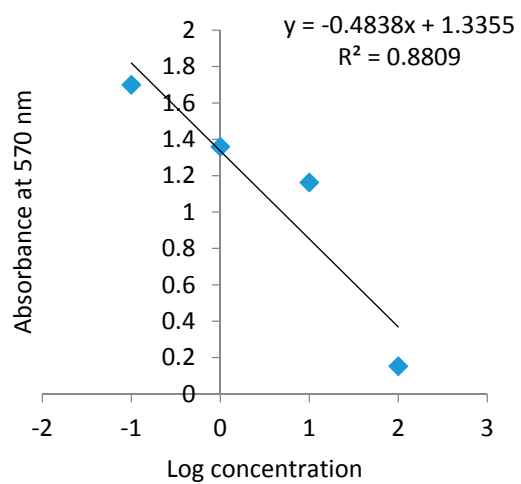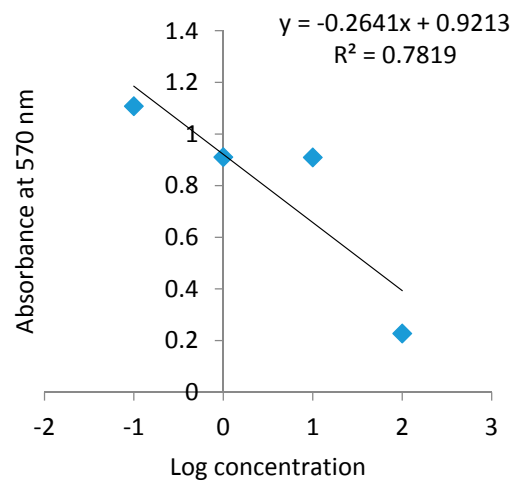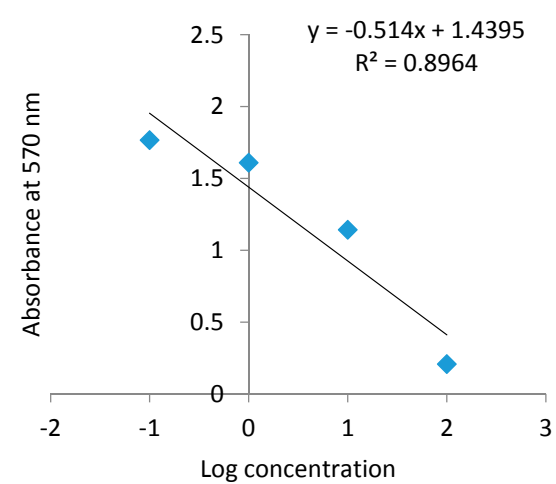

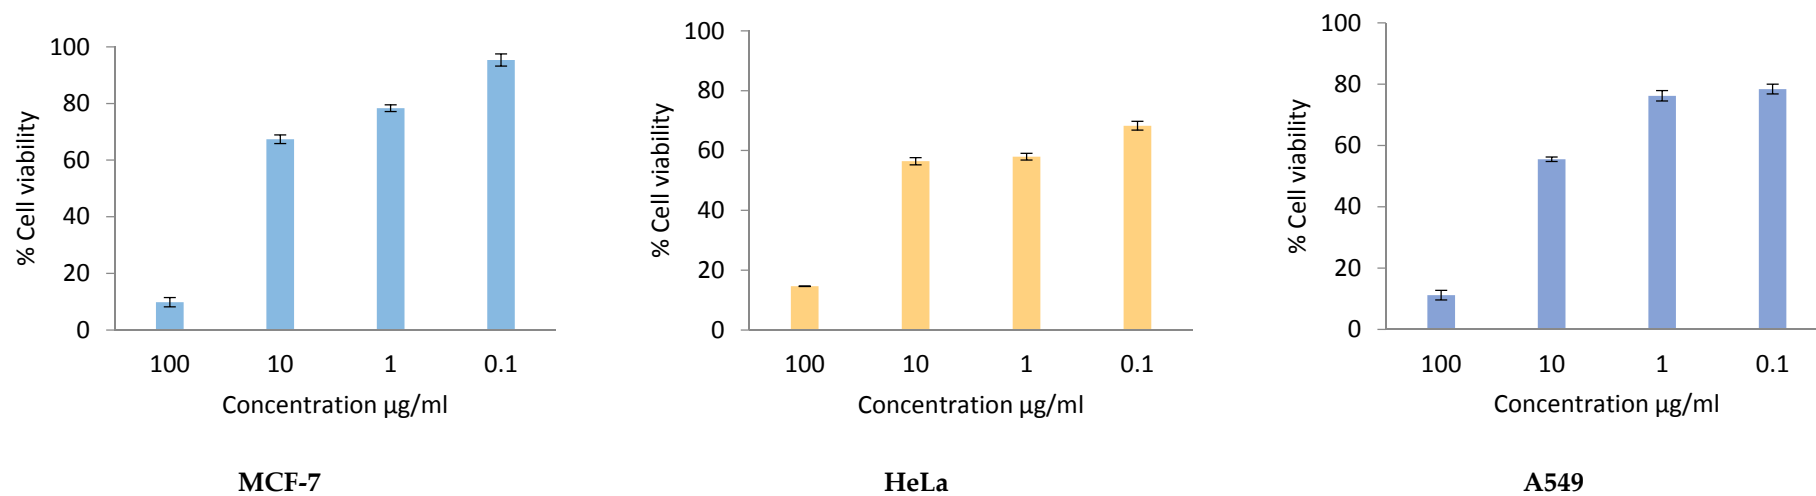

**Figure S60.** Linear regression plots and percentage cell viability graphs of MCF-7, HeLa and A549 cells exposed to different concentrations of 4a.

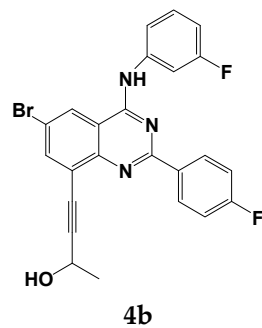

**Figure S61.** Chemical structure of 4b.

**Table S11.** Percentage cell viability of MCF-7, HeLa and A549 cells exposed to different concentrations of **4b**.

| Concentration ( $\mu\text{g/mL}$ ) | Log Concentration | %Viability MCF-7 | SD   | %Viability HeLa | SD   | %Viability A549 | SD   |
|------------------------------------|-------------------|------------------|------|-----------------|------|-----------------|------|
| 100                                | 2                 | 3.73             | 0.73 | 3.48            | 0.09 | 3.46            | 1.63 |
| 10                                 | 1                 | 59.59            | 2.53 | 61.61           | 0.59 | 51.70           | 0.92 |
| 1                                  | 0                 | 78.35            | 1.23 | 83.17           | 0.91 | 91.88           | 0.24 |
| 0.1                                | -1                | 58.45            | 1.08 | 95.10           | 1.84 | 96.53           | 2.78 |

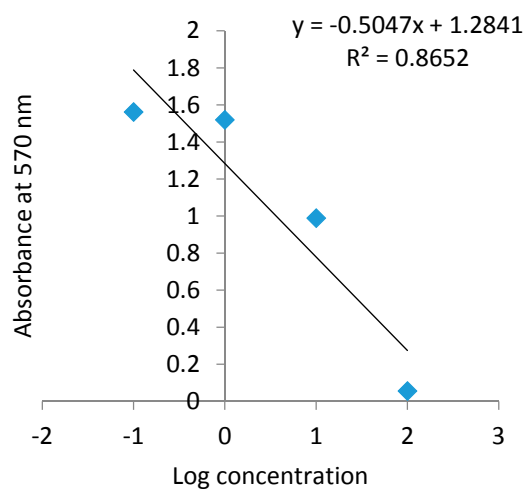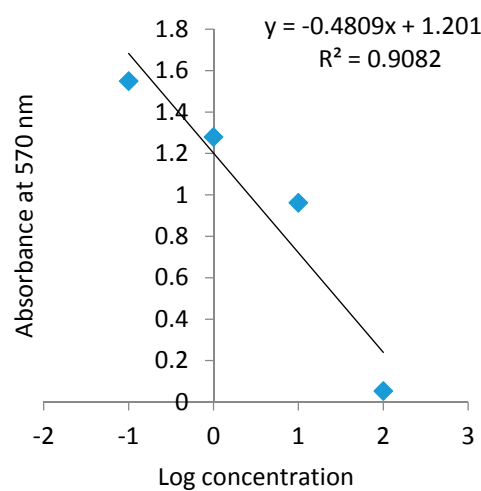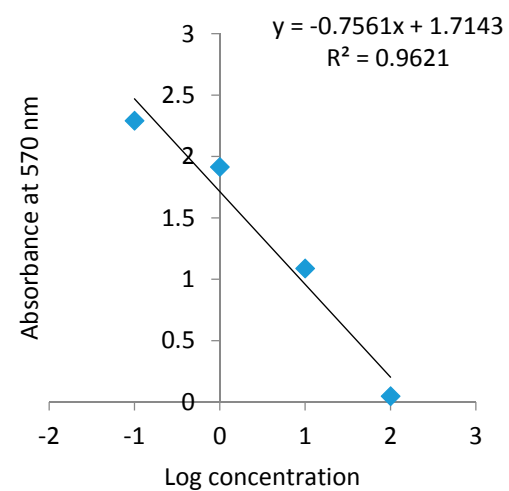

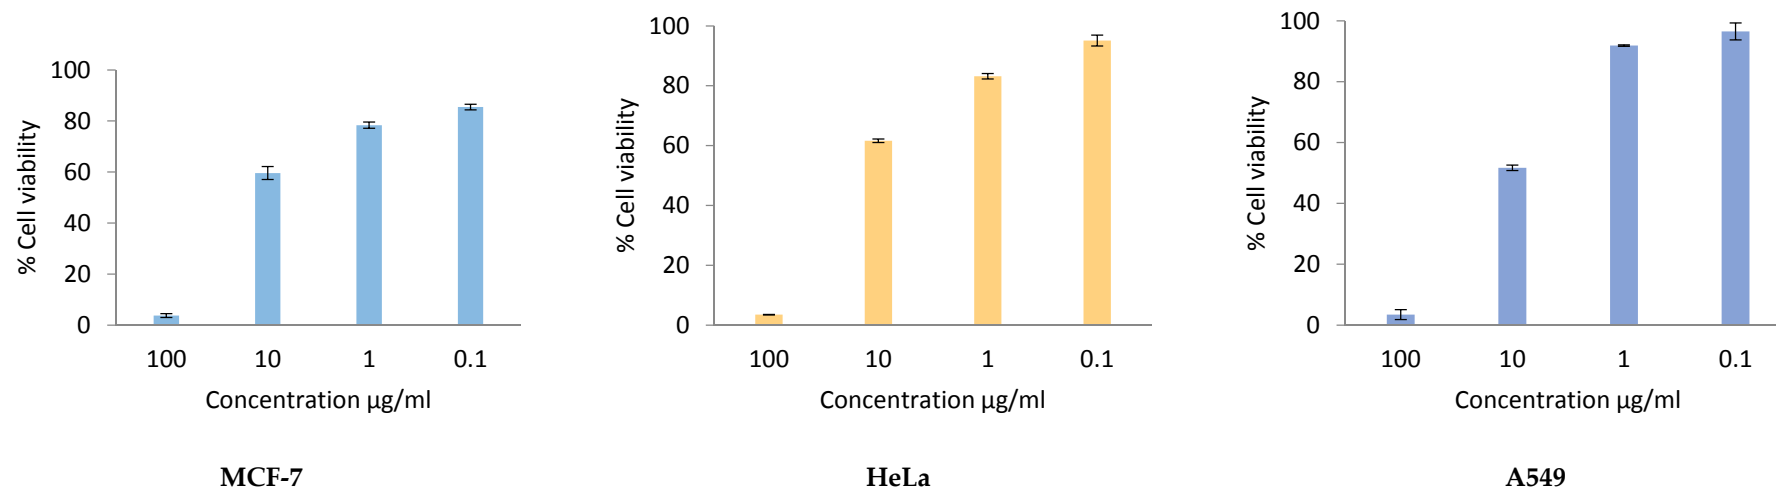

Figure S62. Linear regression plots and percentage cell viability graphs of MCF-7, HeLa and A549 cells exposed to different concentrations of 4b.

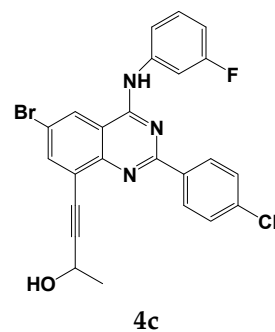

Figure S63. Chemical structure of 4c.



**Table S12.** Percentage cell viability of MCF-7, HeLa and A549 cells exposed to different concentrations of **4c**.

| Concentration ( $\mu\text{g/mL}$ ) | Log Concentration | %Viability MCF-7 | SD   | %Viability HeLa | SD   | %Viability A549 | SD   |
|------------------------------------|-------------------|------------------|------|-----------------|------|-----------------|------|
| 100                                | 2                 | 12.51            | 0.93 | 10.06           | 1.64 | 14.66           | 0.34 |
| 10                                 | 1                 | 53.27            | 2.70 | 36.75           | 1.10 | 37.49           | 1.56 |
| 1                                  | 0                 | 69.54            | 1.02 | 54.81           | 1.10 | 76.72           | 1.06 |
| 0.1                                | -1                | 81.64            | 1.26 | 67.05           | 1.20 | 88.69           | 1.19 |

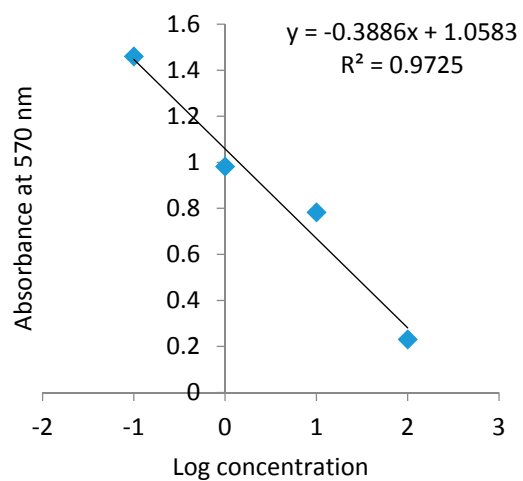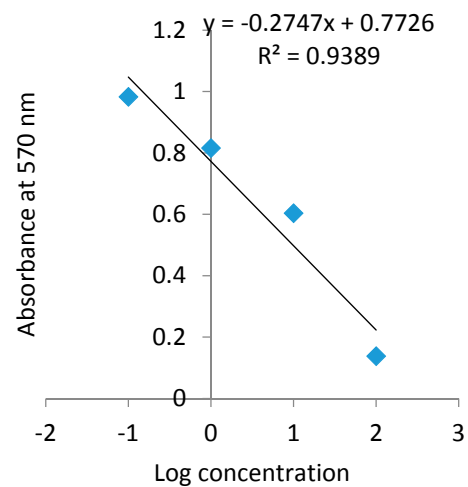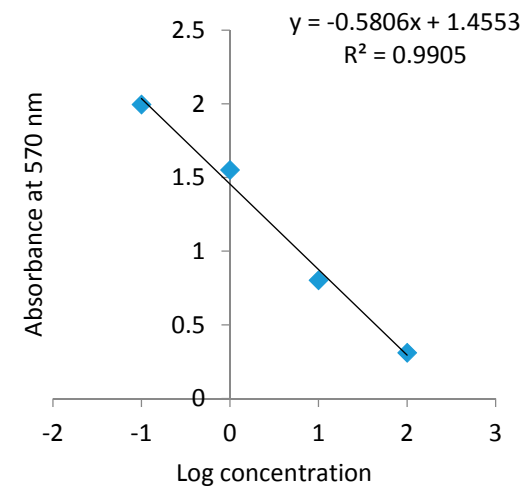

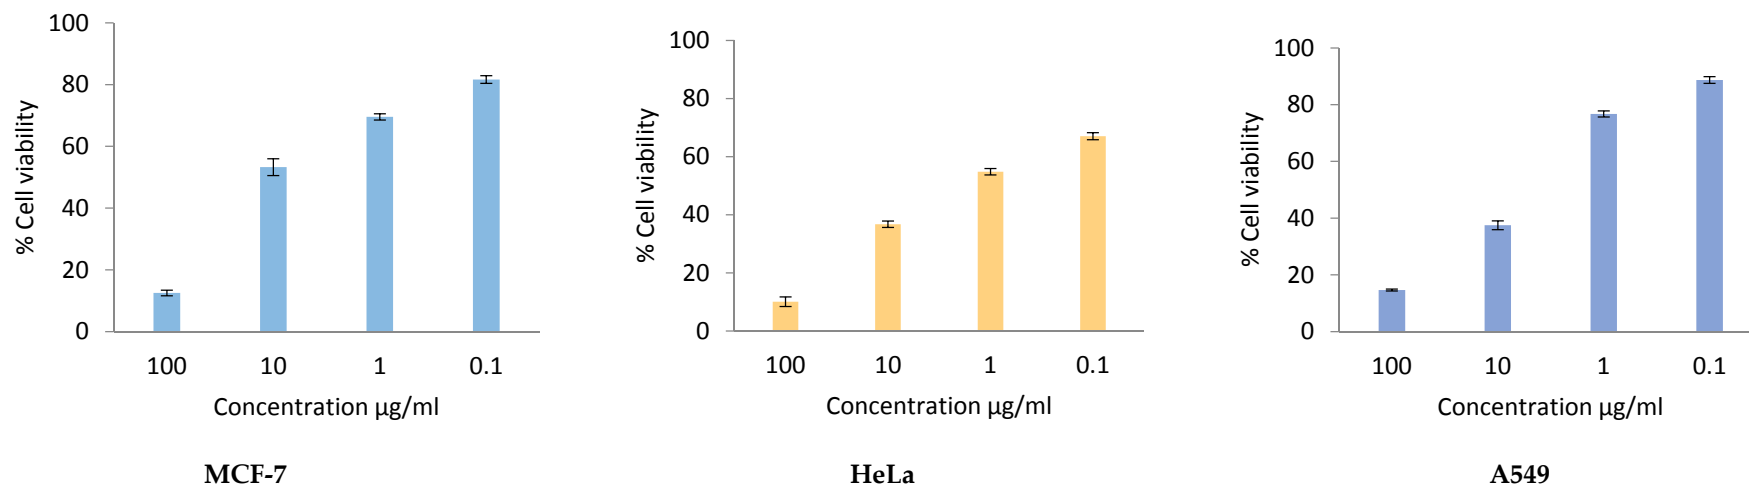

Figure S64. Linear regression plots and percentage cell viability graphs of MCF-7, HeLa and A549 cells exposed to different concentrations of 4c.

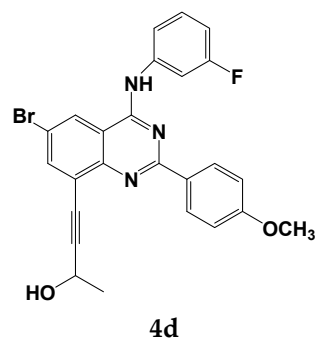

Figure S65. Chemical structure of 4d.

**Table S13.** Percentage cell viability of MCF-7, HeLa and A549 cells exposed to different concentrations of **4d**.

| Concentration ( $\mu\text{g/mL}$ ) | Log Concentration | %Viability MCF-7 | SD   | %Viability HeLa | SD   | %Viability A549 | SD   |
|------------------------------------|-------------------|------------------|------|-----------------|------|-----------------|------|
| 100                                | 2                 | 23.53            | 1.67 | 28.92           | 1.78 | 51.06           | 1.04 |
| 10                                 | 1                 | 59.61            | 1.96 | 50.26           | 0.51 | 54.37           | 0.34 |
| 1                                  | 0                 | 61.00            | 1.69 | 60.67           | 0.97 | 64.12           | 0.48 |
| 0.1                                | -1                | 73.99            | 1.71 | 62.89           | 1.51 | 78.38           | 1.62 |

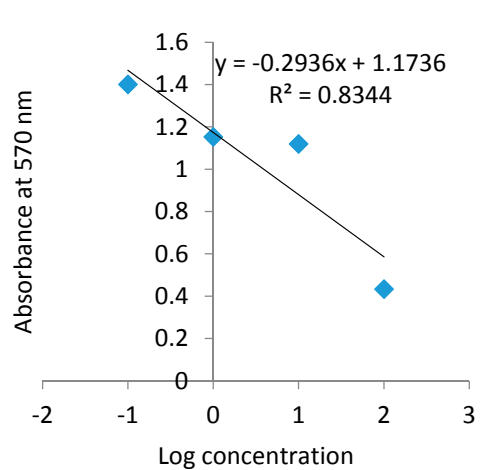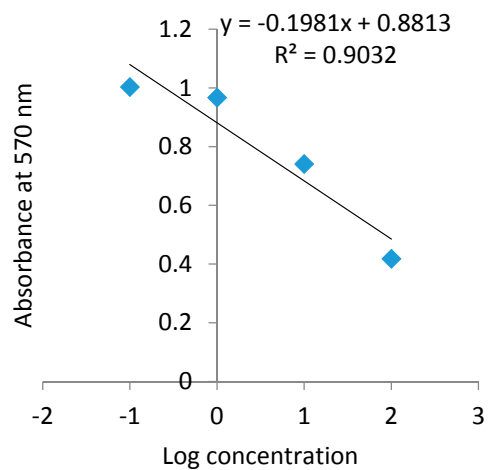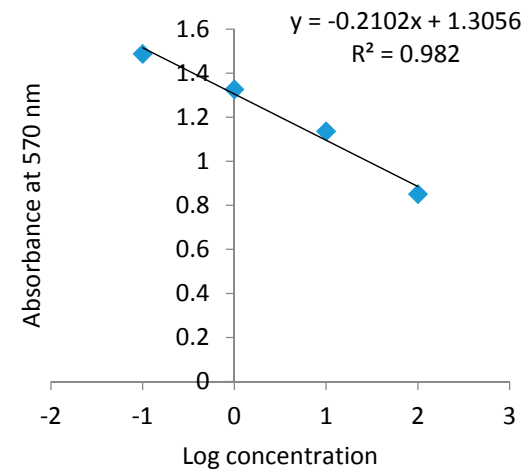

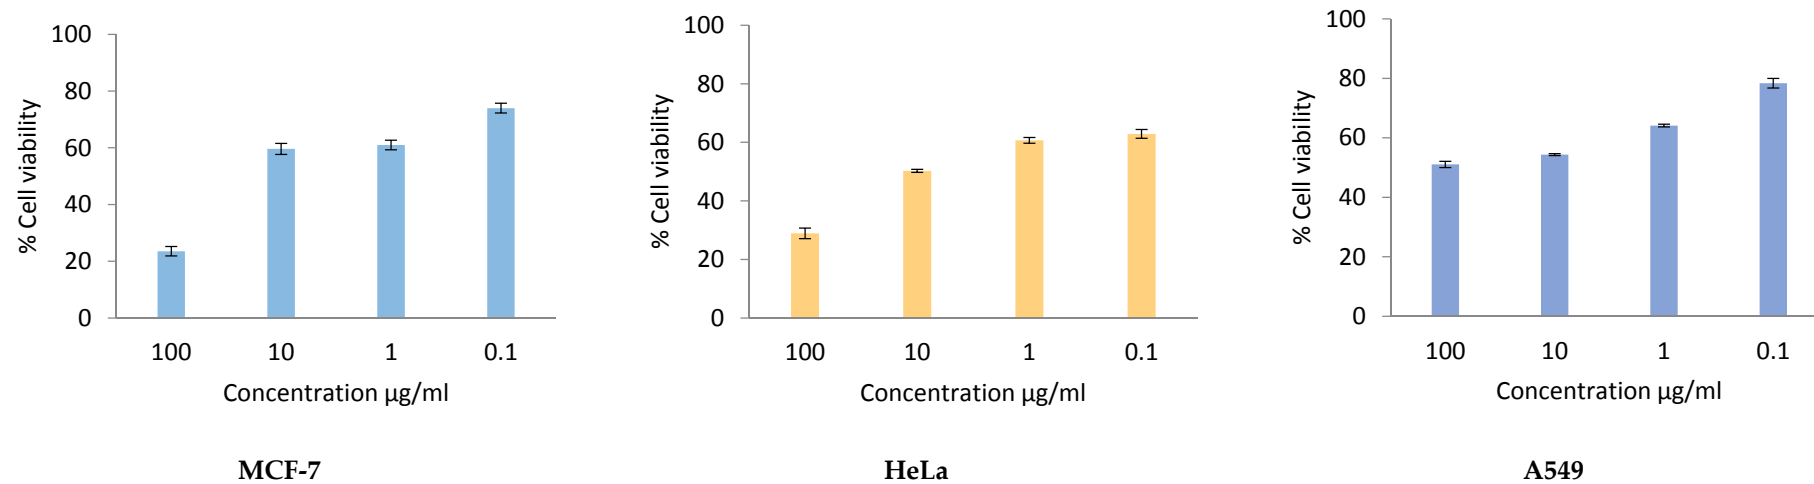

**Figure S66.** Linear regression plots and percentage cell viability graphs of MCF-7, HeLa and A549 cells exposed to different concentrations of 4d.

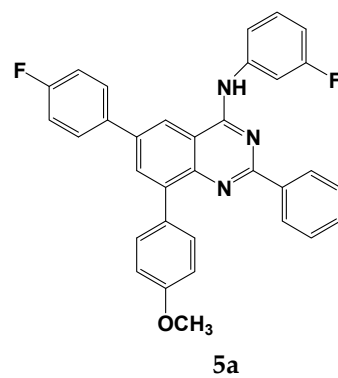

**Figure S67.** Chemical structure of 5a.

**Table S14.** Percentage cell viability of MCF-7, HeLa and A549 cells exposed to different concentrations of **5a**.

| Concentration ( $\mu\text{g/mL}$ ) | Log Concentration | %Viability MCF-7 | SD   | %Viability HeLa | SD         | %Viability A549 | SD   |
|------------------------------------|-------------------|------------------|------|-----------------|------------|-----------------|------|
| 100                                | 2                 | 53.43            | 2.30 | 37.33           | 1.37       | 60.93           | 1.09 |
| 10                                 | 1                 | 64.67            | 1.65 | 43.04           | 1.87       | 61.58           | 1.33 |
| 1                                  | 0                 | 73.05            | 0.10 | 48.52           | 0.32; 2.32 | 80.18           | 1.94 |
| 0.1                                | -1                | 74.42            | 1.51 | 56.25           | 1.42       | 83.59           | 1.76 |

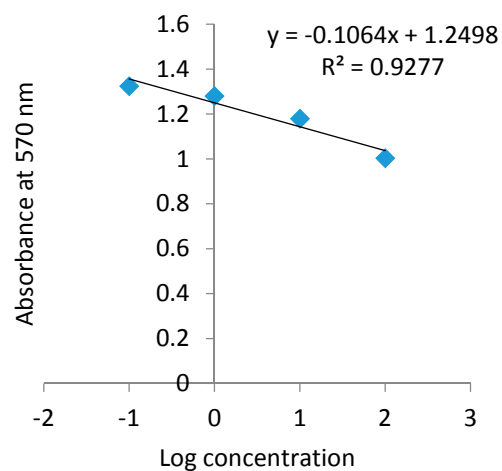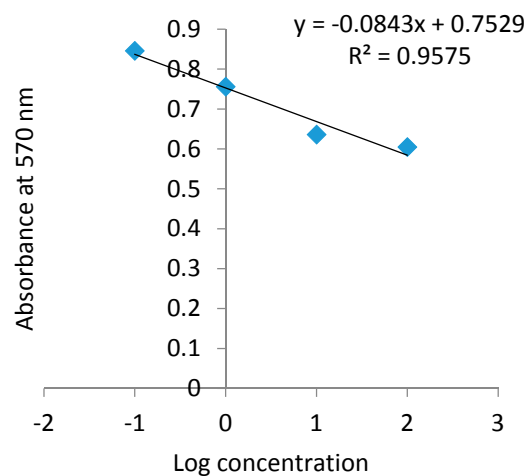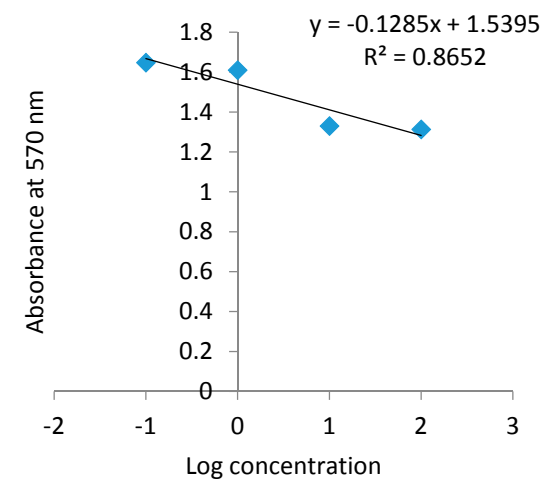

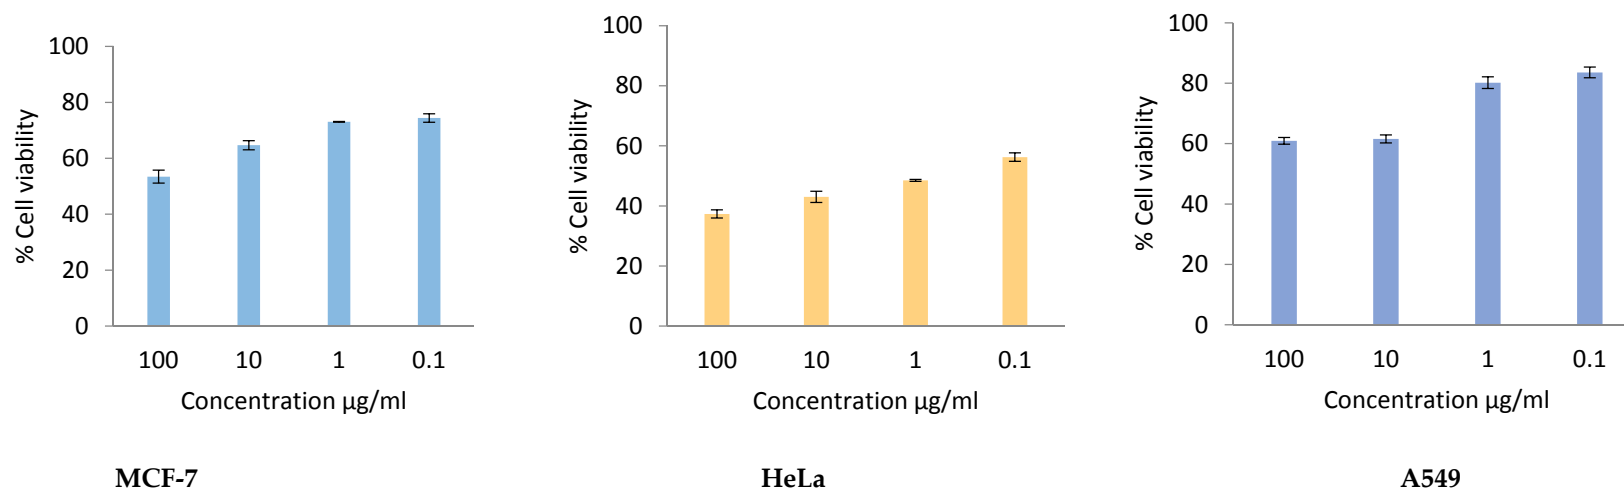

Figure S68. Linear regression plots and percentage cell viability graphs of MCF-7, HeLa and A549 cells exposed to different concentrations of 5a.

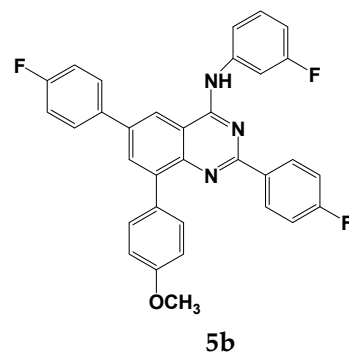

Figure S69. Chemical structure of 5b.

**Table S15.** Percentage cell viability of MCF-7, HeLa and A549 cells exposed to different concentrations of **5b**.

| Concentration ( $\mu\text{g/mL}$ ) | Log Concentration | %Viability MCF-7 | SD   | %Viability HeLa | SD   | %Viability A549 | SD   |
|------------------------------------|-------------------|------------------|------|-----------------|------|-----------------|------|
| 100                                | 2                 | 53.88            | 2.96 | 38.39           | 0.97 | 47.06           | 1.47 |
| 10                                 | 1                 | 56.14            | 1.32 | 54.87           | 0.27 | 55.61           | 1.65 |
| 1                                  | 0                 | 58.04            | 1.26 | 56.58           | 1.87 | 60.64           | 1.77 |
| 0.1                                | -1                | 63.90            | 2.53 | 59.93           | 1.60 | 83.60           | 1.16 |

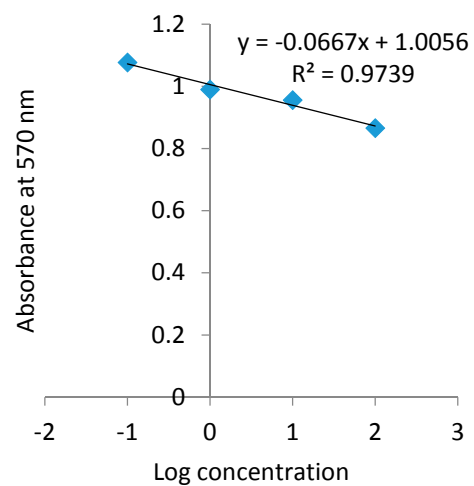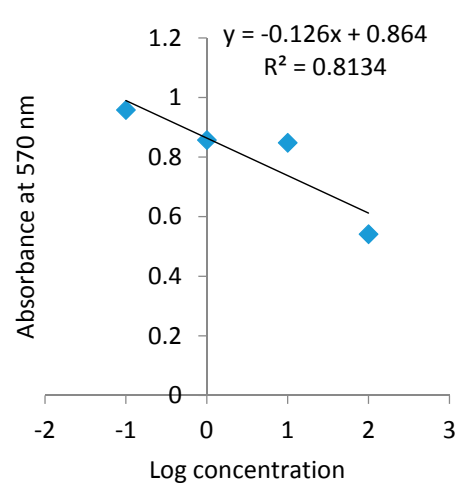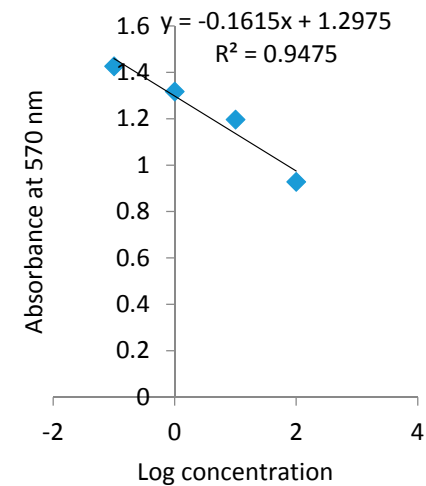

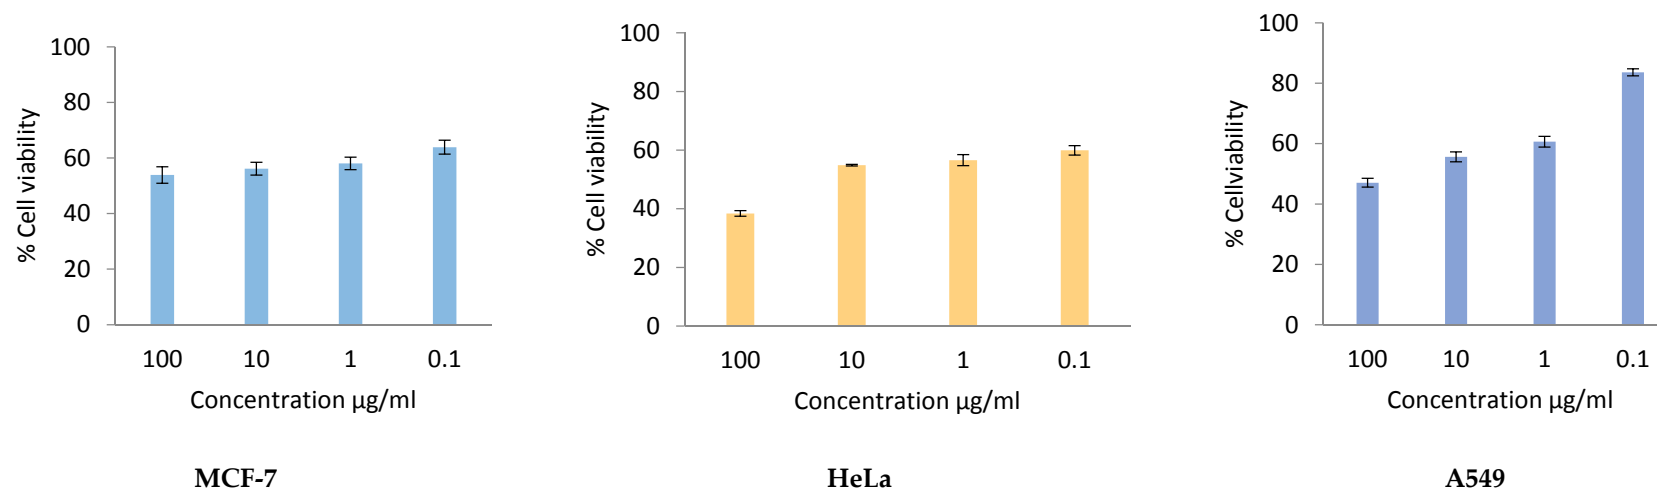

**Figure S70.** Linear regression plots and percentage cell viability graphs of MCF-7, HeLa and A549 cells exposed to different concentrations of 5b.

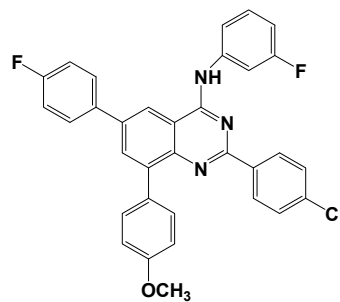

**Figure S71.** Chemical structure of 5c.



**Table S16.** Percentage cell viability of MCF-7, HeLa and A549 cells exposed to different concentrations of 5c.

| Concentration ( $\mu\text{g/mL}$ ) | Log Concentration | %Viability MCF-7 | SD   | %Viability HeLa | SD   | %Viability A549 | SD   |
|------------------------------------|-------------------|------------------|------|-----------------|------|-----------------|------|
| 100                                | 2                 | 47.75            | 1.21 | 42.30           | 1.96 | 52.03           | 0.74 |
| 10                                 | 1                 | 54.70            | 1.33 | 64.73           | 1.77 | 60.01           | 1.13 |
| 1                                  | 0                 | 71.45            | 0.91 | 74.79           | 0.27 | 76.04           | 1.85 |
| 0.1                                | -1                | 79.52            | 1.74 | 86.11           | 1.50 | 89.86           | 1.87 |

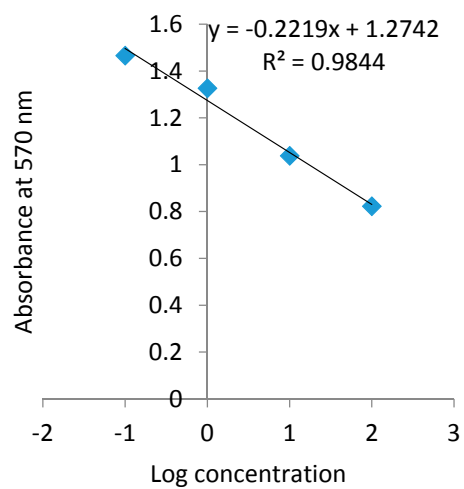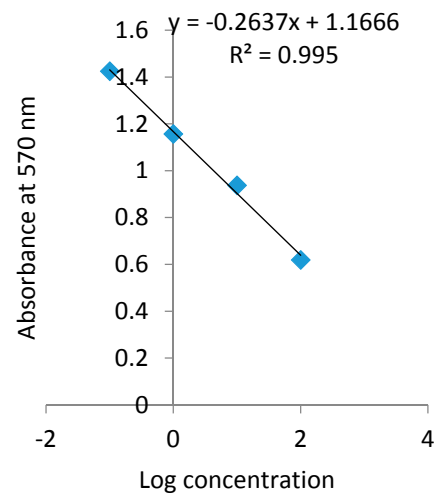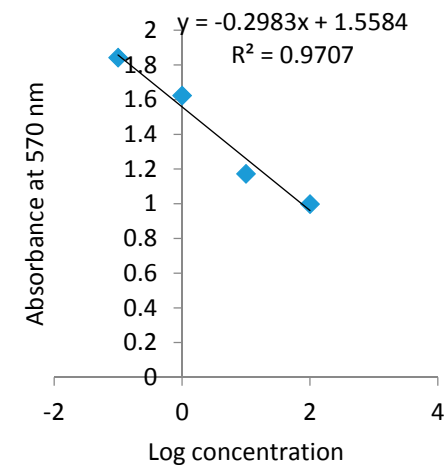

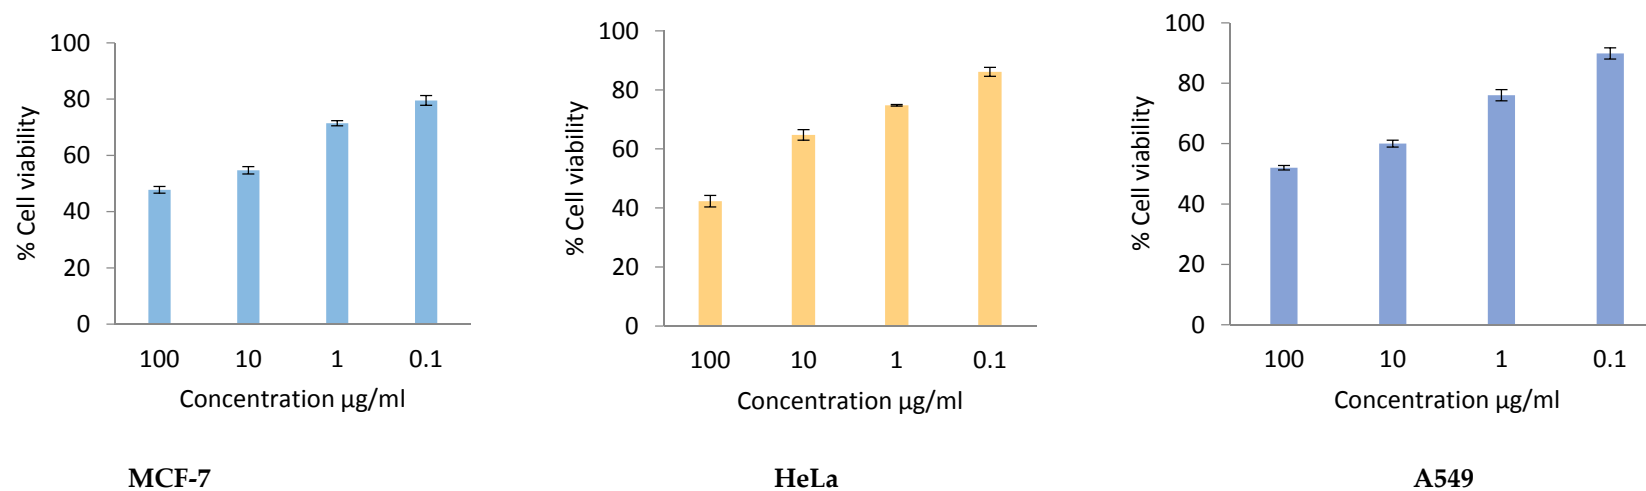

**Figure S72.** Linear regression plots and percentage cell viability graphs of MCF-7, HeLa and A549 cells exposed to different concentrations of 5c.

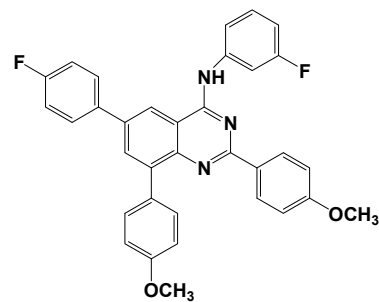

**Figure S73.** Chemical structure of 5d.

**Table S17.** Percentage cell viability of MCF-7, HeLa and A549 cells exposed to different concentrations of 5d.

| Concentration ( $\mu\text{g/mL}$ ) | Log Concentration | %Viability MCF-7 | SD   | %Viability HeLa | SD   | %Viability A549 | SD   |
|------------------------------------|-------------------|------------------|------|-----------------|------|-----------------|------|
| 100                                | 2                 | 66.23            | 0.69 | 66.12           | 0.50 | 64.12           | 1.90 |
| 10                                 | 1                 | 67.59            | 0.97 | 73.50           | 1.01 | 71.16           | 1.53 |
| 1                                  | 0                 | 85.36            | 1.05 | 81.66           | 0.87 | 86.33           | 1.26 |
| 0.1                                | -1                | 96.09            | 1.97 | 98.97           | 1.37 | 97.75           | 1.74 |

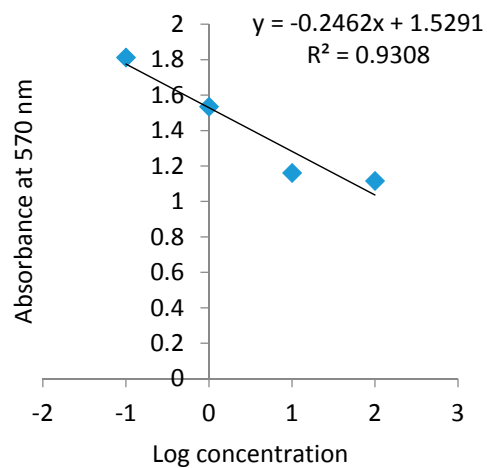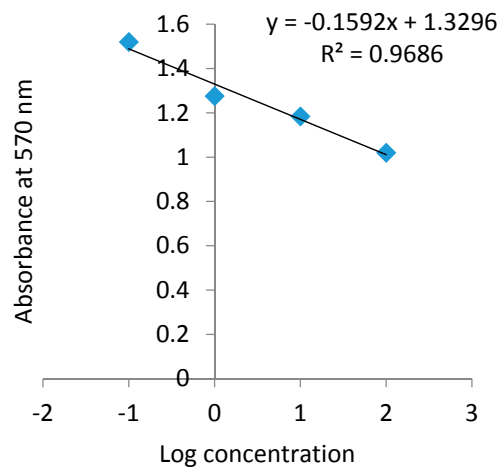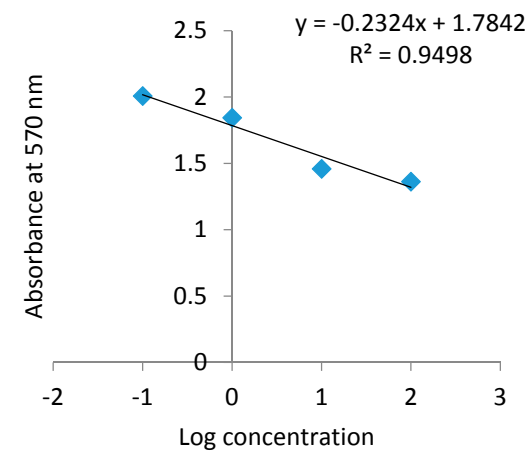

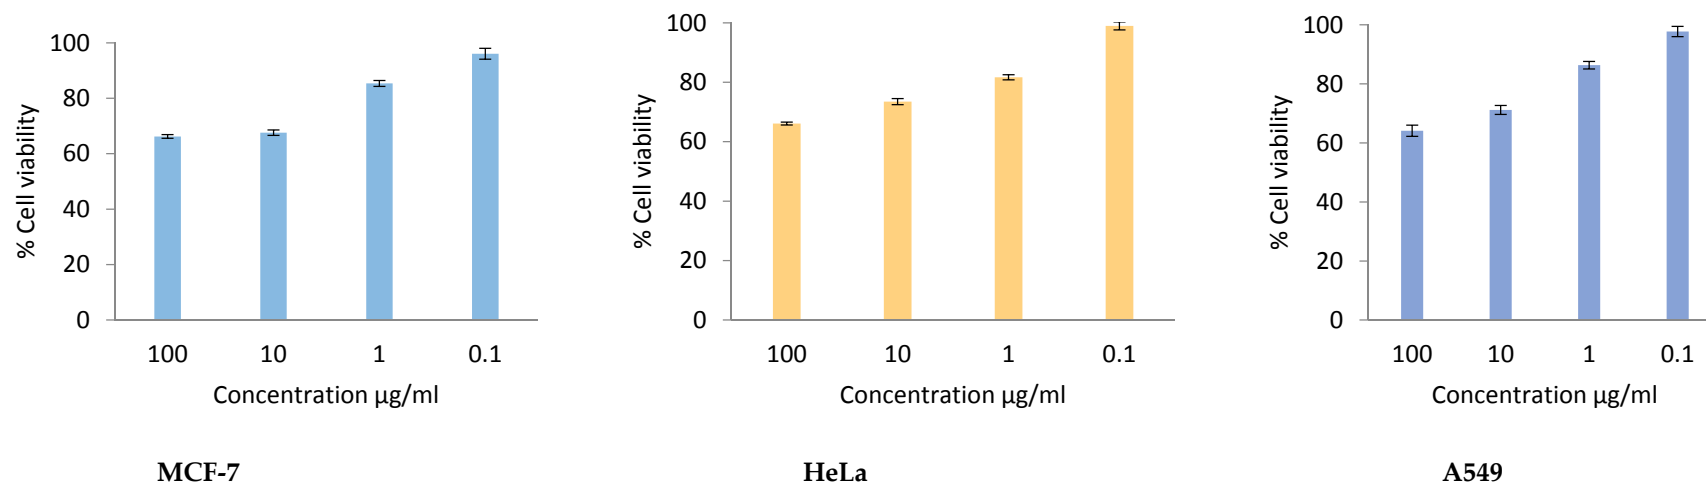

Figure S74. Linear regression plots and percentage cell viability graphs of MCF-7, HeLa and A549 cells exposed to different concentrations of 5d.

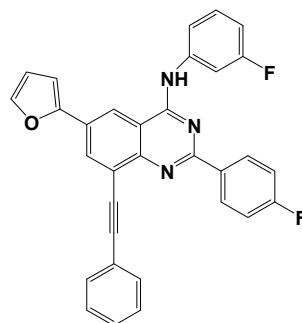

Figure S75. Chemical structure of 6b.

**Table S21.** Percentage cell viability of MCF-7, HeLa and A549 cells exposed to different concentrations of **6b**.

| Concentration ( $\mu\text{g/mL}$ ) | Log Concentration | %Viability MCF-7 | SD   | %Viability HeLa | SD   | %Viability A549 | SD   |
|------------------------------------|-------------------|------------------|------|-----------------|------|-----------------|------|
| 100                                | 2                 | 24.03            | 0.99 | 27.18           | 1.32 | 30.96           | 0.88 |
| 10                                 | 1                 | 76.03            | 1.36 | 50.71           | 1.06 | 87.77           | 1.49 |
| 1                                  | 0                 | 90.53            | 2.84 | 63.48           | 1.60 | 96.06           | 1.48 |
| 0.1                                | -1                | 98.06            | 1.61 | 89.83           | 1.16 | 98.18           | 0.17 |

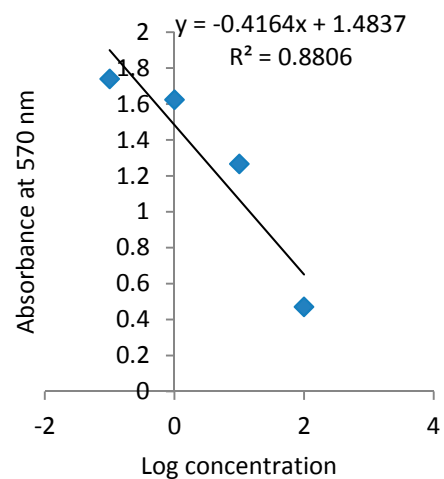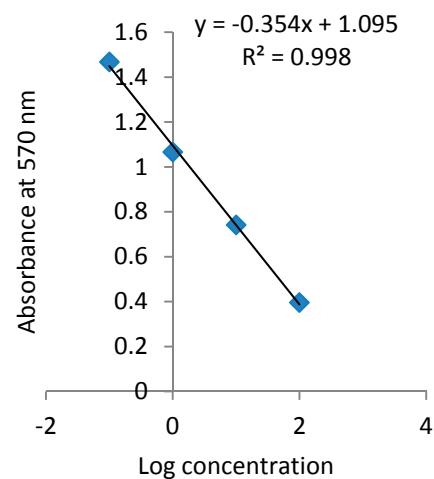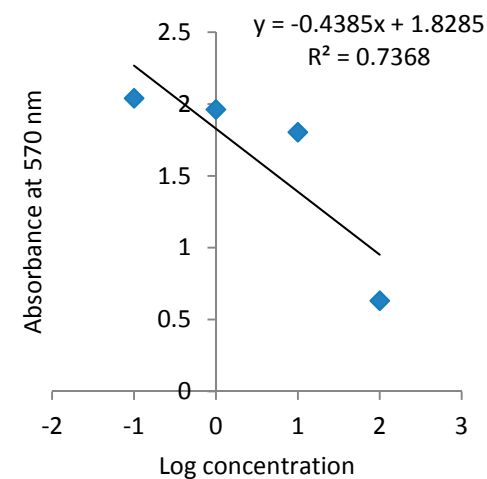

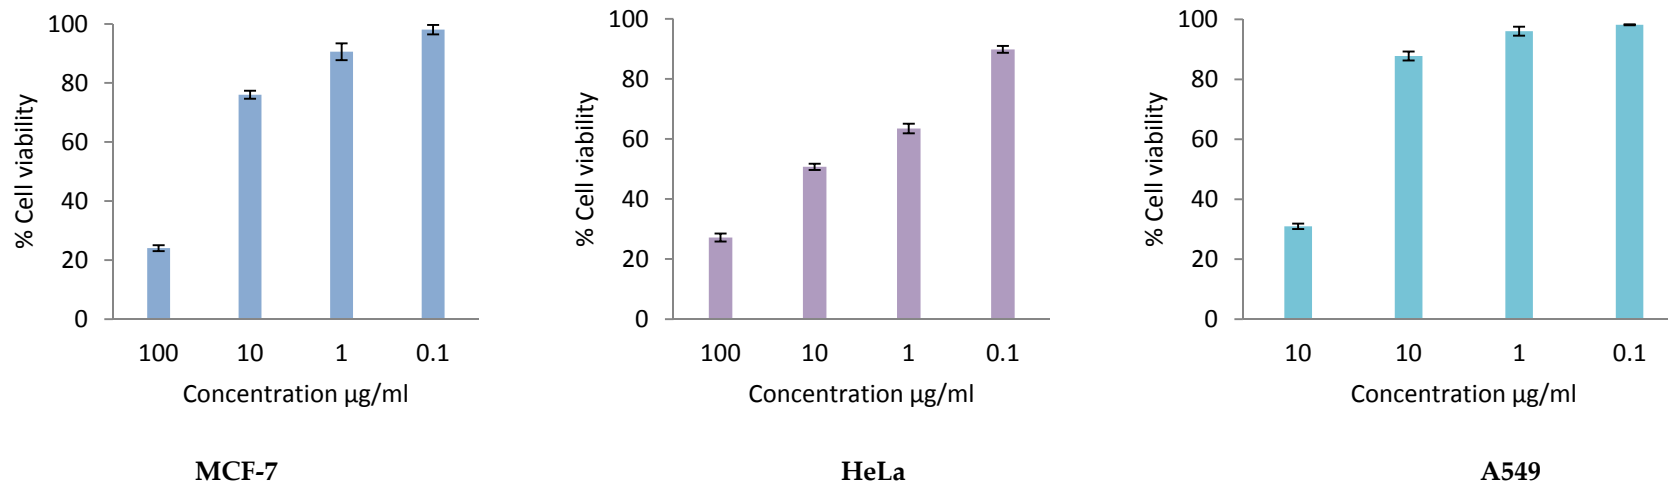

Figure S76. Linear regression plots and percentage cell viability graphs of MCF-7, HeLa and A549 cells exposed to different concentrations of 6b.

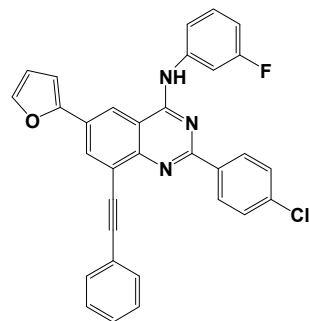

Figure S77. Chemical structure of 6c.

**Table S23.** Percentage cell viability of MCF-7, HeLa and A549 cells exposed to different concentrations of 6c.

| Concentration ( $\mu\text{g/mL}$ ) | Log Concentration | %Viability MCF-7 | SD   | %Viability HeLa | SD   | %Viability A549 | SD   |
|------------------------------------|-------------------|------------------|------|-----------------|------|-----------------|------|
| 100                                | 2                 | 53.26            | 2.31 | 53.16           | 1.33 | 66.96           | 0.41 |
| 10                                 | 1                 | 58.52            | 2.67 | 53.64           | 0.74 | 78.88           | 1.80 |
| 1                                  | 0                 | 66.26            | 3.87 | 58.80           | 0.91 | 86.16           | 1.05 |
| 0.1                                | -1                | 84.78            | 1.10 | 73.42           | 1.49 | 92.96           | 1.34 |

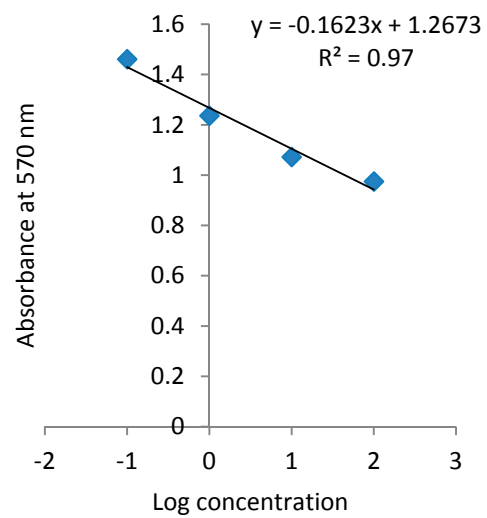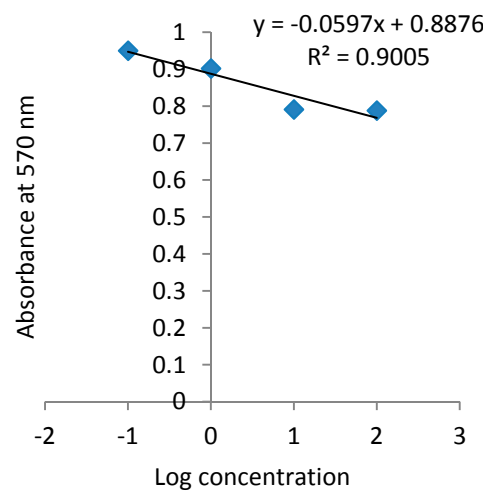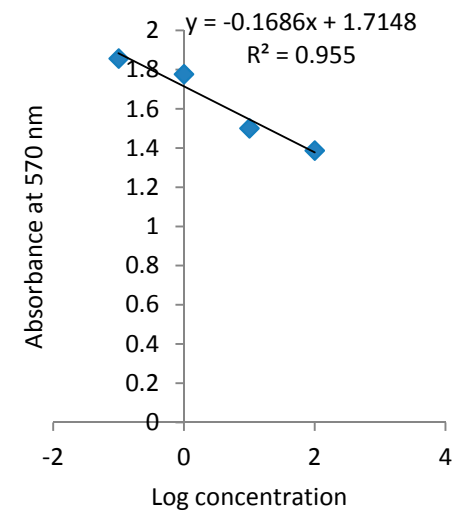

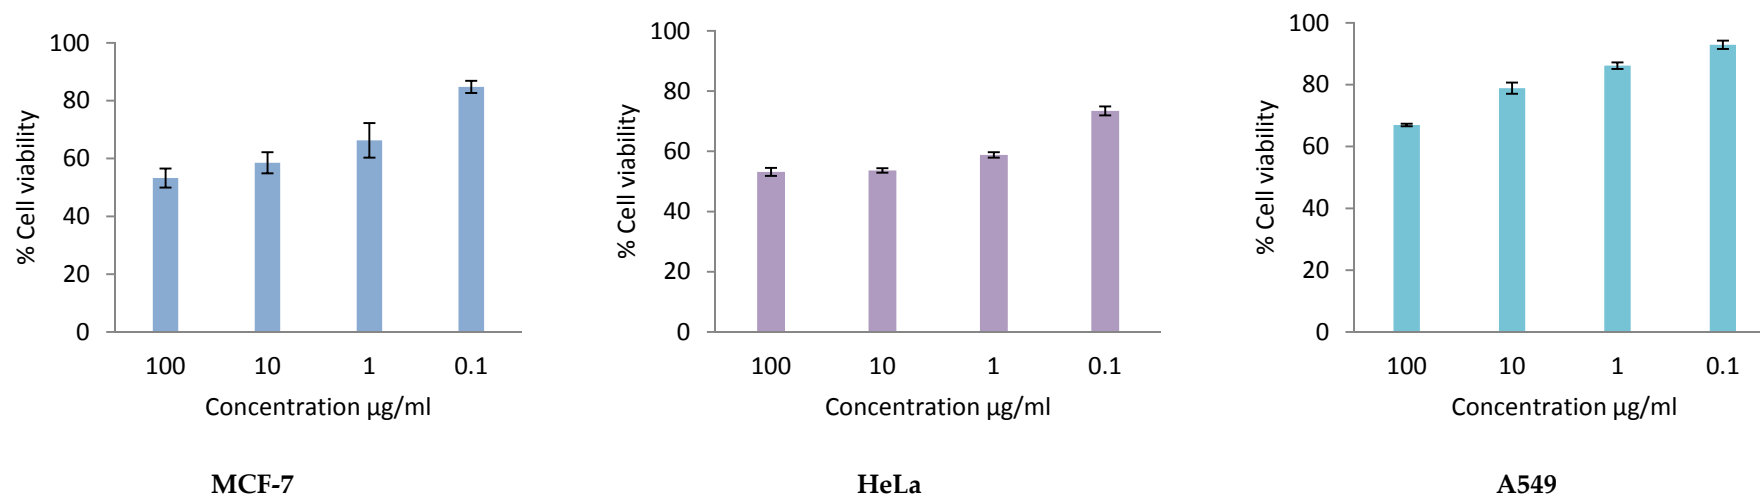

**Figure S78.** Linear regression plots and percentage cell viability graphs of MCF-7, HeLa and A549 cells exposed to different concentrations of 6c.

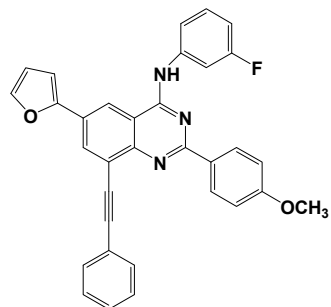

**Figure S79.** Chemical structure of 6d.



**Table S22.** Percentage cell viability of MCF-7, HeLa and A549 cells exposed to different concentrations of **6d**.

| Concentration ( $\mu\text{g/mL}$ ) | Log Concentration | %Viability MCF-7 | SD   | %Viability HeLa | SD   | %Viability A549 | SD   |
|------------------------------------|-------------------|------------------|------|-----------------|------|-----------------|------|
| 100                                | 2                 | 72.18            | 1.29 | 77.66           | 1.62 | 67.10           | 1.96 |
| 10                                 | 1                 | 76.62            | 1.09 | 87.33           | 0.23 | 93.07           | 1.34 |
| 1                                  | 0                 | 83.84            | 2.26 | 93.49           | 1.56 | 95.51           | 1.60 |
| 0.1                                | -1                | 97.29            | 0.52 | 95.71           | 1.41 | 98.78           | 0.34 |

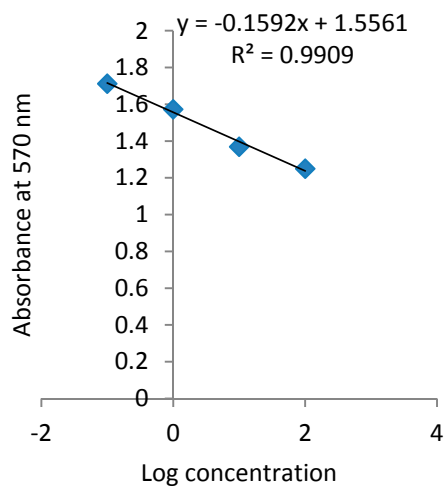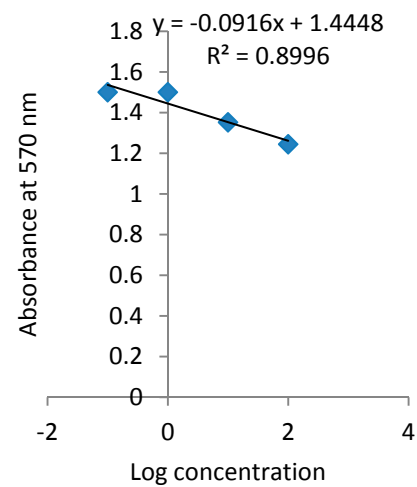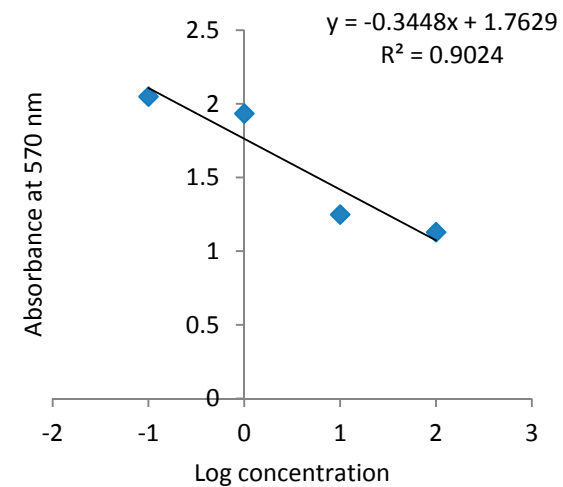

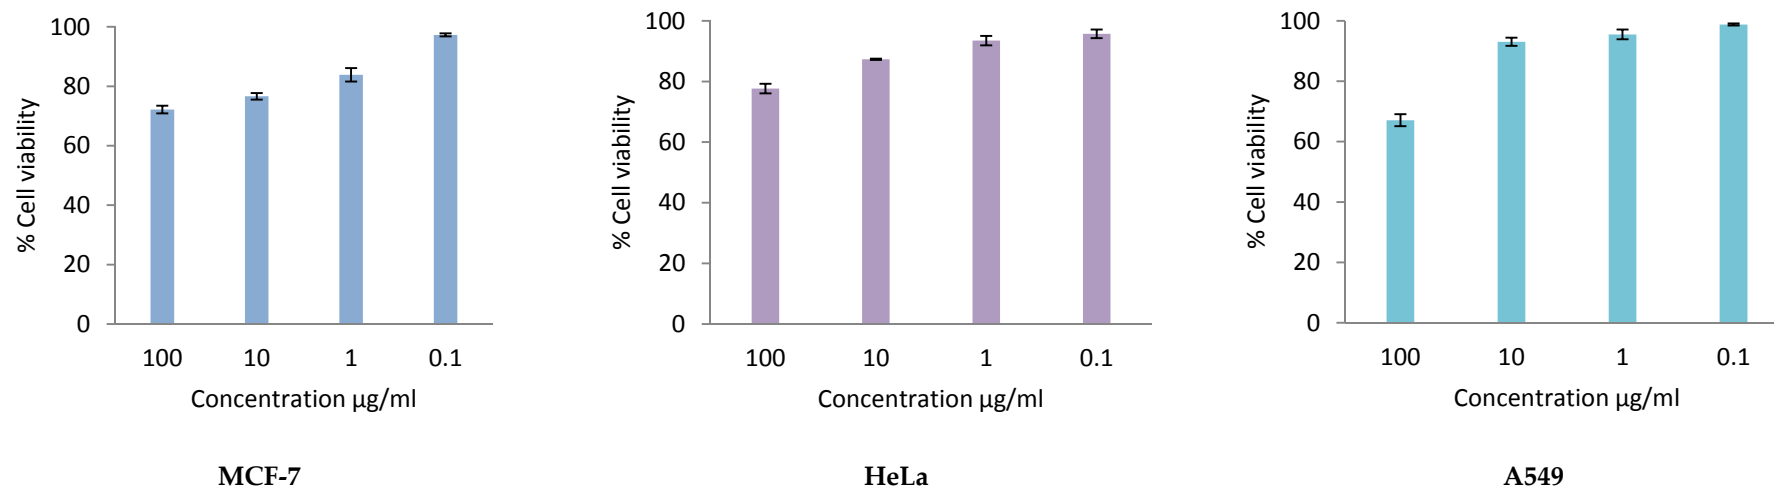

**Figure S80.** Linear regression plots and percentage cell viability graphs of MCF-7, HeLa and A549 cells exposed to different concentrations of 6d.

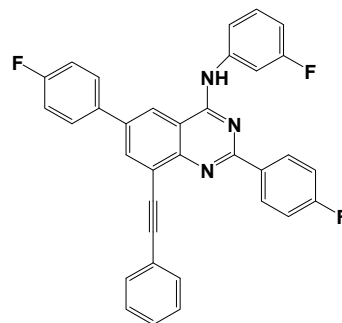

**Figure S81.** Chemical structure of 7a.

**Table S18.** Percentage cell viability of MCF-7, HeLa and A549 cells exposed to different concentrations of **7a**.

| Concentration ( $\mu\text{g/mL}$ ) | Log Concentration | %Viability MCF-7 | SD   | %Viability HeLa | SD   | %Viability A549 | SD   |
|------------------------------------|-------------------|------------------|------|-----------------|------|-----------------|------|
| 100                                | 2                 | 41.31            | 0.28 | 38.68           | 1.23 | 57.44           | 0.48 |
| 10                                 | 1                 | 46.27            | 0.36 | 44.52           | 1.78 | 62.37           | 1.23 |
| 1                                  | 0                 | 52.70            | 1.51 | 62.6            | 1.60 | 68.50           | 1.90 |
| 0.1                                | -1                | 72.20            | 0.95 | 64.76           | 1.69 | 80.08           | 1.36 |

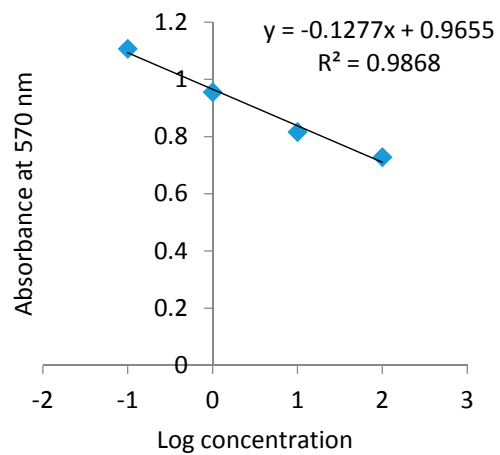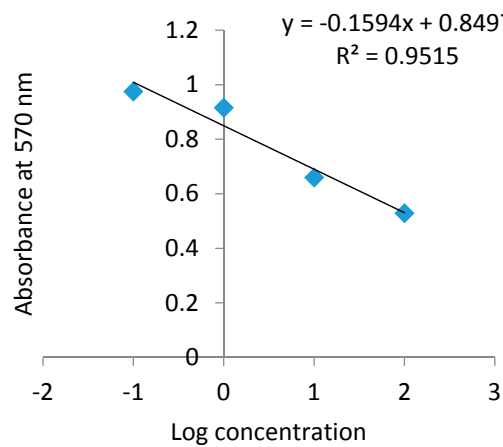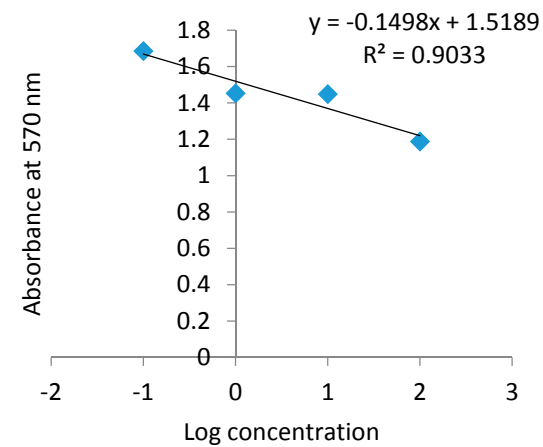

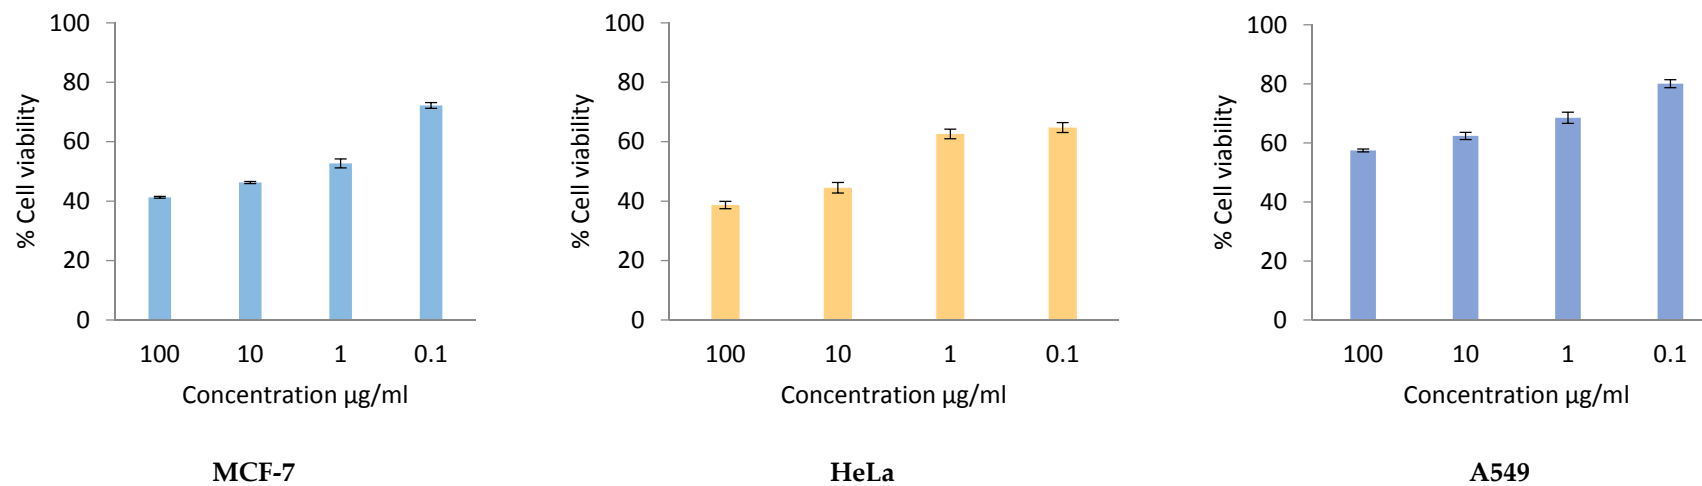

Figure S82. Linear regression plots and percentage cell viability graphs of MCF-7, HeLa and A549 cells exposed to different concentrations of 7a.

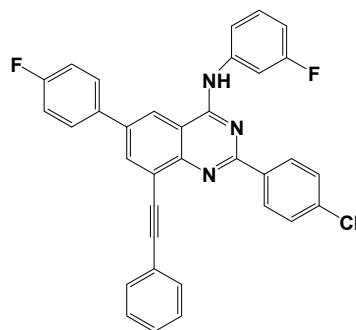

Figure S83. Chemical structure of 7b.

**Table S19.** Percentage cell viability of MCF-7, HeLa and A549 cells exposed to different concentrations of **7b**.

| Concentration ( $\mu\text{g/mL}$ ) | Log Concentration | %Viability MCF-7 | SD   | %Viability HeLa | SD   | %Viability A549 | SD   |
|------------------------------------|-------------------|------------------|------|-----------------|------|-----------------|------|
| 100                                | 2                 | 64.42            | 1.61 | 53.80           | 1.23 | 66.48           | 1.36 |
| 10                                 | 1                 | 65.68            | 0.71 | 55.03           | 2.14 | 70.92           | 1.03 |
| 1                                  | 0                 | 67.45            | 1.29 | 74.47           | 1.01 | 76.21           | 1.57 |
| 0.1                                | -1                | 70.65            | 1.87 | 75.69           | 1.46 | 87.67           | 1.62 |

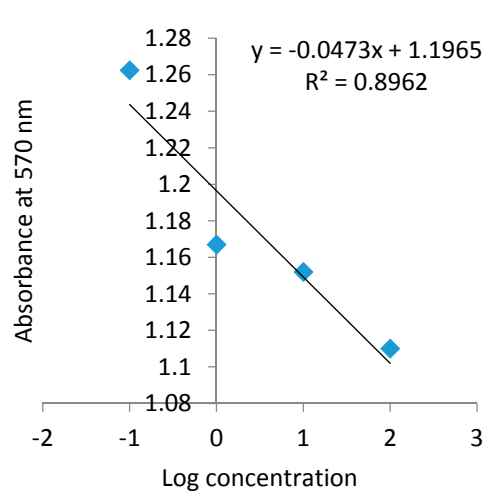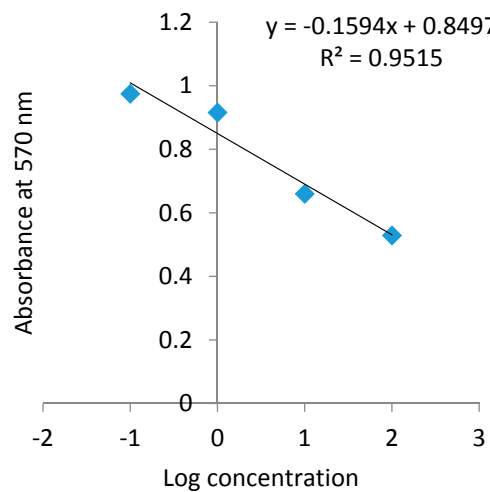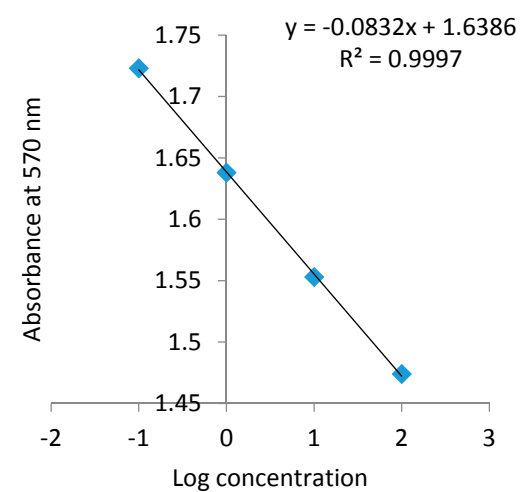

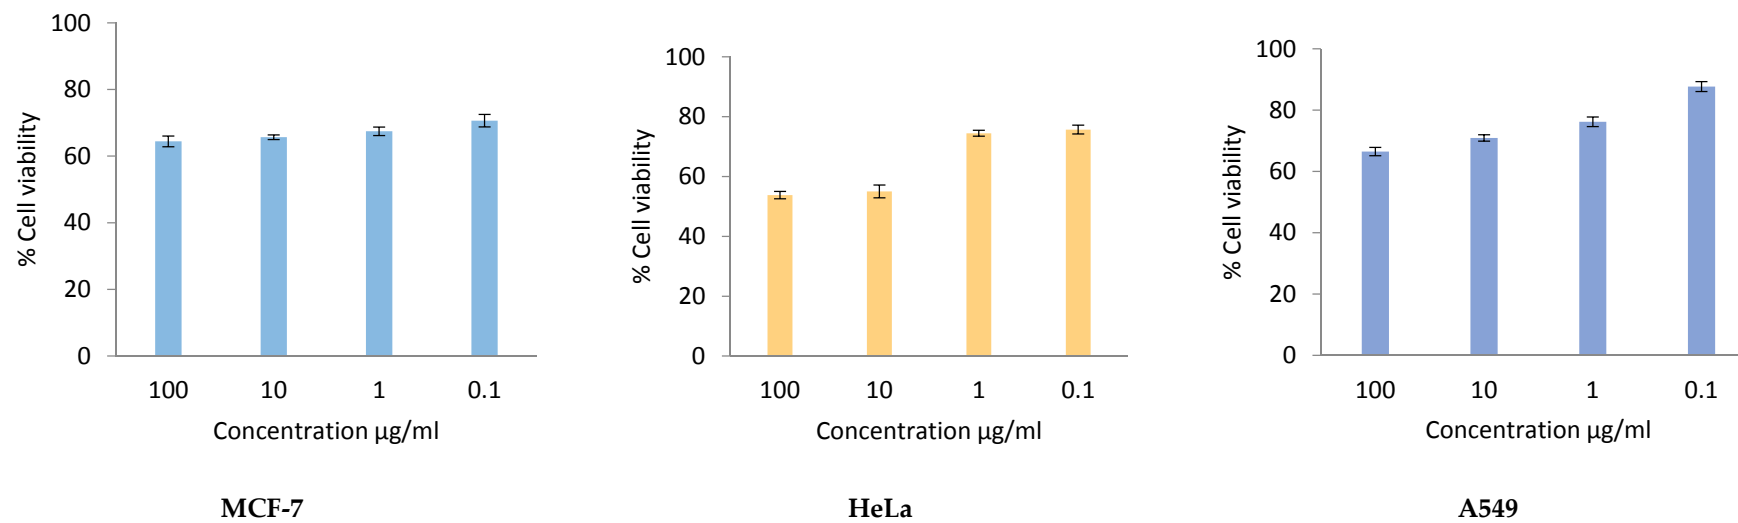

Figure S84. Linear regression plots and percentage cell viability graphs of MCF-7, HeLa and A549 cells exposed to different concentrations of 7b.

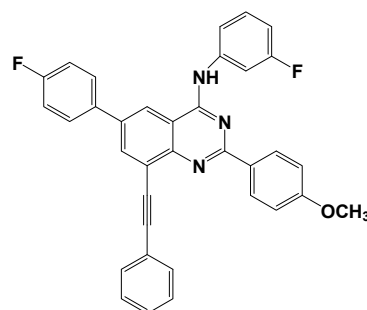

Figure S85. Chemical structure of 7c.

**Table S20.** Percentage cell viability of MCF-7, HeLa and A549 cells exposed to different concentrations of 7c

| Concentration ( $\mu\text{g/mL}$ ) | Log Concentration | %Viability MCF-7 | SD   | %Viability HeLa | SD   | %Viability A549 | SD   |
|------------------------------------|-------------------|------------------|------|-----------------|------|-----------------|------|
| 100                                | 2                 | 41.86            | 1.67 | 59.77           | 1.56 | 82.39           | 0.20 |
| 10                                 | 1                 | 55.18            | 1.39 | 74.89           | 1.78 | 84.46           | 0.41 |
| 1                                  | 0                 | 64.3             | 2.15 | 75.79           | 1.32 | 93.83           | 1.21 |
| 0.1                                | -1                | 87.88            | 2.01 | 81.01           | 1.78 | 97.82           | 0.34 |

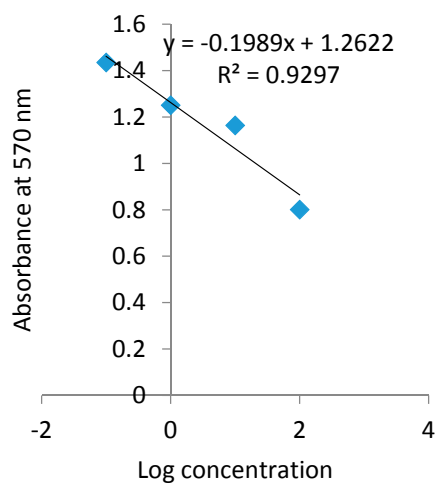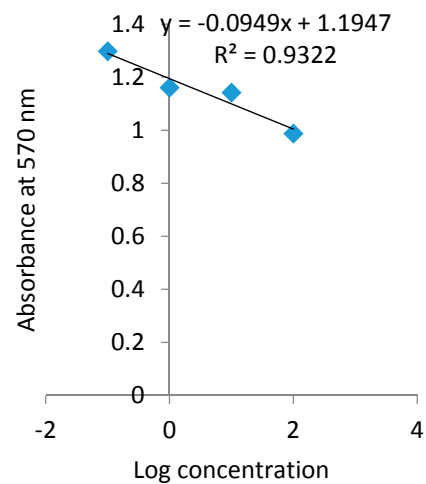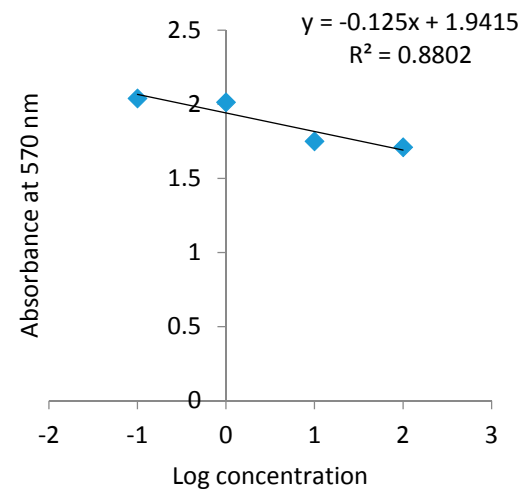

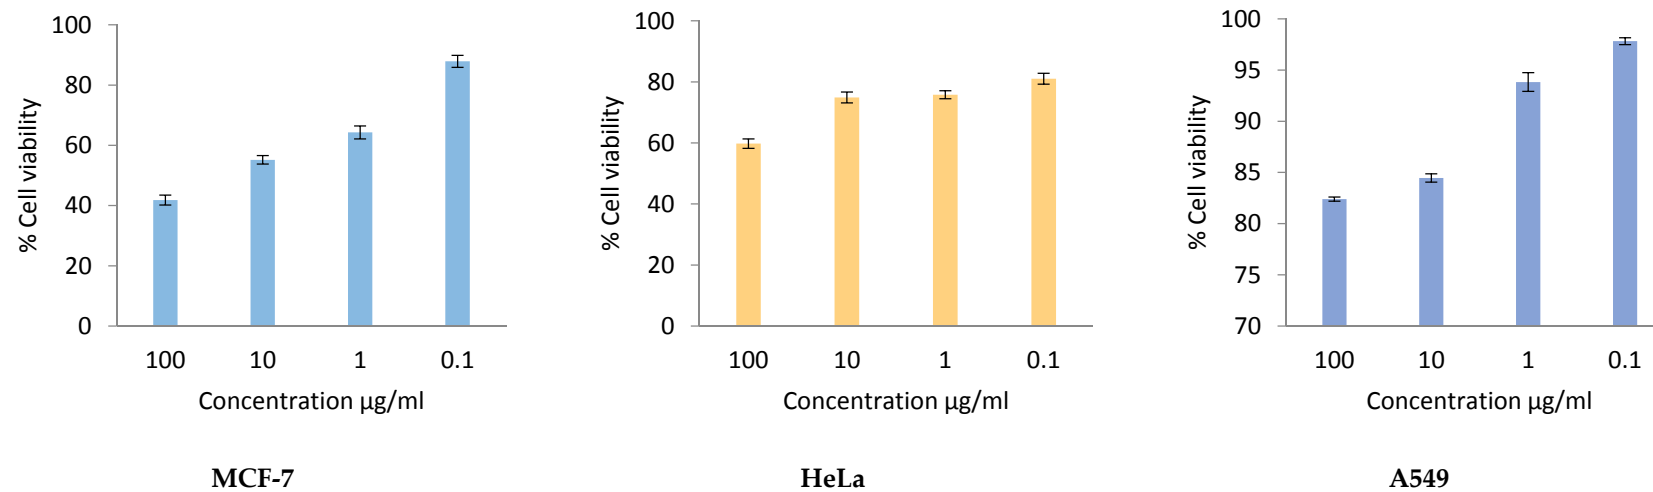

**Figure S86.** Linear regression plots and percentage cell viability graphs of MCF-7, HeLa and A549 cells exposed to different concentrations of 7c.
